# Supplementary material for: Diyne-steered switchable regioselectivity in cobalt(ii)-catalysed C(sp2)–H activation of amides with unsymmetrical 1,3-diynes
Source: Royal Society of Chemistry journal article supplement (doi:10.1039/d2ob02193e), 2023-01-01
Supplement: d2ob02193e1.pdf [file d2ob02193e1.pdf]

Electronic Supplementary Material (ESI) for Organic & Biomolecular Chemistry.  
This journal is © The Royal Society of Chemistry 2019

## Supporting Information

### **Diyne-steered switchable regioselectivity in cobalt(II)-catalysed C(*sp*<sup>2</sup>)-H activation of amides with unsymmetrical 1,3-diynes**

Prakriti Dhillon, Prasad Anaspure, Jesper G. Wiklander, Subban Kathiravan and  
Ian A. Nicholls\*

Bioorganic & Biophysical Chemistry Laboratory, Centre for Biomaterials Chemistry,  
Department of Chemistry & Biomedical Sciences, Linnaeus University, Kalmar, 39130,  
Sweden.

E-mail: [ian.nicholls@lnu.se](mailto:ian.nicholls@lnu.se)

## Table of Contents

|                                                          |            |
|----------------------------------------------------------|------------|
| <b>General information</b> .....                         | <b>2</b>   |
| <b>Analytical information</b> .....                      | <b>2</b>   |
| <b>General procedures</b> .....                          | <b>2</b>   |
| <b>Synthesis of benzamides<sup>1</sup></b> .....         | <b>2</b>   |
| <b>Synthesis of unsymmetrical 1,3-diynes (2-5)</b> ..... | <b>2</b>   |
| <i>Bromination of terminal alkynes<sup>2</sup></i> ..... | <i>2</i>   |
| <i>Cross-coupling reaction<sup>3</sup></i> .....         | <i>2</i>   |
| <b>HPLC trace analysis</b> .....                         | <b>4</b>   |
| <b>NMR &amp; HRMS spectral Data</b> .....                | <b>7</b>   |
| <b>XRD</b> .....                                         | <b>93</b>  |
| <b>References</b> .....                                  | <b>100</b> |

## General information

All solvents were used as received. Co(acac)<sub>2</sub>, Mn(OAc)<sub>2</sub>, and NaOPiv·H<sub>2</sub>O were purchased from Aldrich and Chemtronica. Terminal alkynes, 8-aminoquinoline and benzoyl chlorides were purchased from commercial sources (Aldrich/Chemtronica). Silica gel (60 Å) from Chemtronica was used for column chromatography. Preparative TLC plates were purchased from Merck (PLC Silica gel 60 F<sub>254</sub> 0.5 mm with concentrating zone 20 x 20 cm). Thin layer chromatography was performed on aluminum sheets precoated with silica gel with fluorescence indicator (254 nm).

## Analytical information

Melting points (uncorrected) were recorded using a Stuart Scientific Melting Point SMP1. IR spectra were recorded using an Agilent Cary 630 FTIR spectrometer. NMR spectra were recorded using a Bruker Avance Neo 400 MHz NMR spectrometer. Chemical shifts (δ) are reported parts in per million (ppm), relative to the signals for residual undeuterated solvent, unless otherwise stated. Mass spectra (HRMS) were obtained at the Lund University Kemicentrum Mass Spectrometry facility using a Waters XEVO-G2 QTOF ESI+ mass spectrometer. The capillary voltage, cone voltage, source temperature, and desolvation temperature was 3.0 kV, 35 V, 120°C and 300°C, respectively. Cone gas flow and desolvation gas flow was 50 and 400 l h<sup>-1</sup>, respectively. Analyses were performed in continuum resolution mode with a mass range of m/z 100-1200, using manual lock mass correction with leucine-enkephalin (m/z 556.2771) as reference. HPLC chromatograms were recorded using Merck-Hitachi (Model D-7000IF) using a silica column (Material: Ultrasphere 5 SI, Batch: S806073, Dimensions: 250 x 4.6mm).

## General procedures

### Synthesis of benzamides<sup>1</sup>

To a solution of 8-aminoquinoline (1.0 equiv., 17 mmol) and *N,N*-dimethyl-4-aminopyridine (1.7 mmol, 10 mol%) in anhydrous CH<sub>2</sub>Cl<sub>2</sub> (20 mL) under nitrogen was added Et<sub>3</sub>N (1.1 equiv., 19 mmol) and the resulting solution was cooled to 0 °C. Benzoyl chlorides (1.2 equiv., 20.4 mmol) was added dropwise, and the reaction mixture was stirred at room temperature for 48 h. The mixture was quenched with water (20 mL) and extracted with CH<sub>2</sub>Cl<sub>2</sub> (4x10 mL). The combined organic phase was dried over MgSO<sub>4</sub> and filtered. Concentration under reduced pressure followed by flash column chromatography on silica gel using petroleum

ether: acetone (8:2) as eluent afforded the *N*-(quinolin-8-yl)benzamides in 85-95% yield. Data is consistent with literature.

### **Synthesis of unsymmetrical 1,3-diynes (2-5)**

#### *Bromination of terminal alkynes<sup>2</sup>*

Br<sub>2</sub> (0.73 equiv.) was added dropwise using a syringe to a stirring solution of KOH (5.23 eq) and water (25 mL) cooled to 0 °C. After 15 mins., the terminal alkyne (1.0 equiv.) was added dropwise, and the mixture was left to stir for 1.5 h at 0 °C after which it was warmed to room temperature and extracted using Et<sub>2</sub>O, dried over MgSO<sub>4</sub> and filtered. The filtrate was concentrated under reduced pressure which gave the bromoalkynes as a colorless oily liquid with pungent smell in more than 95 % yield.

#### *Cross-coupling reaction<sup>3</sup>*

A 30% solution of BuNH<sub>2</sub>/H<sub>2</sub>O (20 mL) was prepared in a round-bottom flask equipped with a magnetic stirrer to which was added CuCl (20 mol %, 0.2 equiv.). The resulting blue color was quenched by adding enough NH<sub>2</sub>OH·HCl, then phenylacetylene (1.0 equiv.) was added resulting in a cloudy yellow solution which was left to stir at 0 °C for 15 min. Then, the bromo-alkyne (1.0 equiv.) in Et<sub>2</sub>O (2 mL) was added to the above solution along with a spatula of NH<sub>2</sub>OH·HCl. The reaction mixture was stirred at 0 °C for 1-1.5 h after which it was warmed to room temperature and extracted with Et<sub>2</sub>O (10 mL x 3) and dried over MgSO<sub>4</sub>, filtered, concentrated *in vacuo*, and purified through flash chromatography using petroleum ether:acetone (4:1) which afforded the unsymmetrical 1,3-diynes in 50 - 80 % yield.



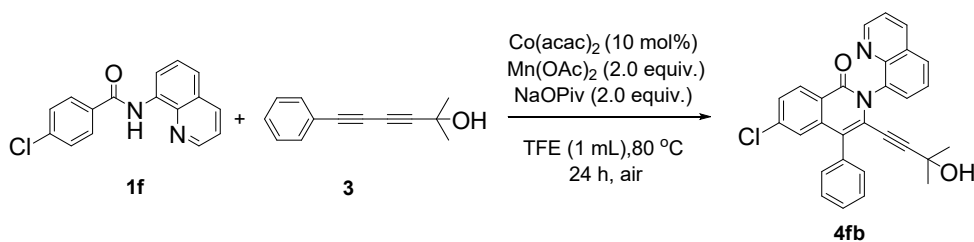

D-7000 HSM: kleomenis Series: 1115 Report: original System: Sys 1

### D-7000 HPLC System Manager Report

Analyzed: 21-05-26 15:09 Reported: 21-05-27 08:09  
 Processed: 21-05-26 15:34  
 Data Path: C:\PROGRAM FILES\HSM\kleomenis\DATA\1115\  
 Processing Method: Prasad gradient update 280-330  
 System(acquisition): Sys 1 Series:1115  
 Application: kleomenis Vial Number: 2  
 Sample Name: DB+4-Cl (15 µL) Vial Type: UNK  
 Injection from this vial: 1 of 6 Volume: 10,0 ul  
 Sample Description:

Absorbance Mode: NORMAL(2.0 AU) Absorbance Scale: Auto  
 Spectral Bandwidth: AUTO Spectral Interval: 1600 ms

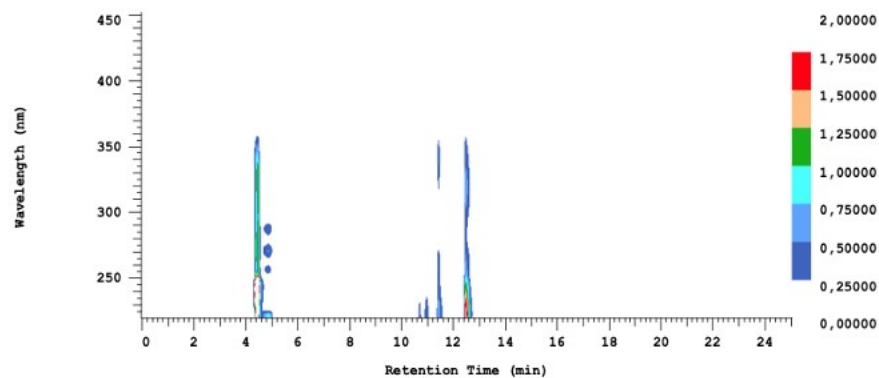

Chrom Type: Best Chromatogram

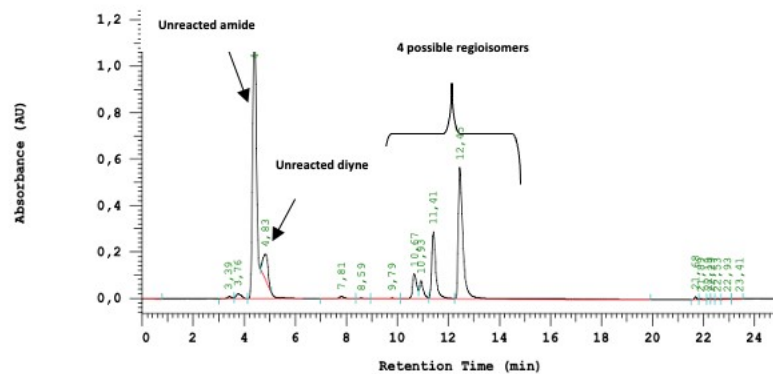

Acquisition Method: Prasad gradient update 280-330  
 Column Type: Developed by: JW  
 Pump A Type: L-7100  
 Solvent A: Solvent B: IPA  
 Solvent C: Pet Ether  
 Method Description:

Chrom Type: Best Chromatogram

## HPLC trace of reaction between 4-chlorobenzamide (1f) and diyne 3

# HPLC of the major regioisomer 4fb from the reaction between 4-chlorobenzamide (1f) and diyne 3 after purification

D-7000 HSM: kleomenis      Series: 1124      Report: original      System: Sys 1

## D-7000 HPLC System Manager Report

Analyzed: 21-05-27 16:30      Reported: 21-05-28 08:45  
 Data Path: C:\PROGRAM FILES\HSM\kleomenis\DATA\1124\  
 Processing Method: Prasad gradient update      Processed: 21-05-27 16:55  
 System(acquisition): Sys 1      Series:1124  
 Application: kleomenis      Vial Number: 2  
 Sample Name: DB + 4-Cl (200 µL)      Vial Type: UNK  
 Injection from this vial: 1 of 5      Volume: 10,0 ul  
 Sample Description:

Absorbance Mode: NORMAL(2.0 AU)      Absorbance Scale: Auto  
 Spectral Bandwidth: AUTO      Spectral Interval: 1600 ms

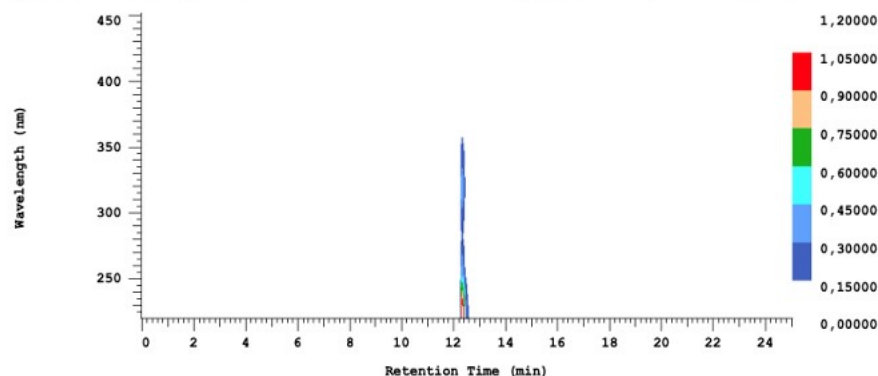

Chrom Type: Fixed WL Chromatogram, 330 nm

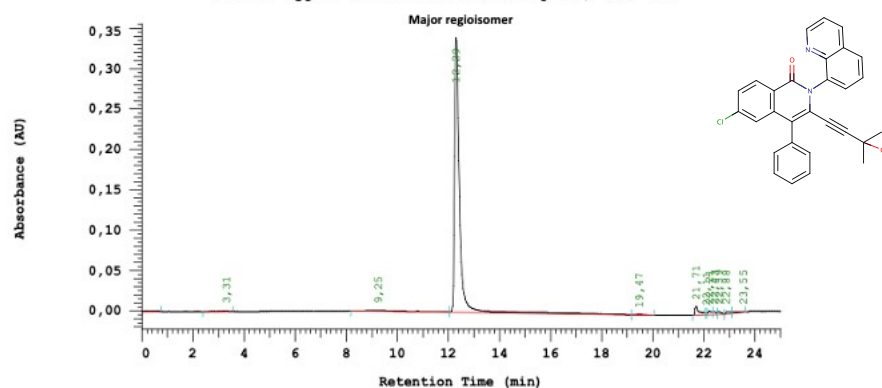

Acquisition Method: Prasad gradient update  
 Column Type:      Developed by: Prasad  
 Pump A Type: L-7100  
 Solvent A:      Solvent B: IPA  
 Solvent C: Pet Ether  
 Method Description:

Chrom Type: Fixed WL Chromatogram, 330 nm

Peak Quantitation: AREA

## Preparative TLC chromatography example

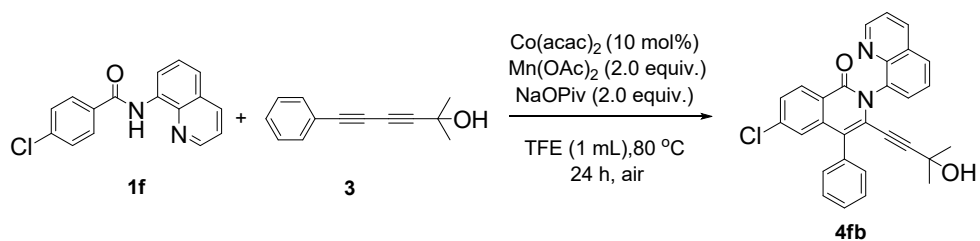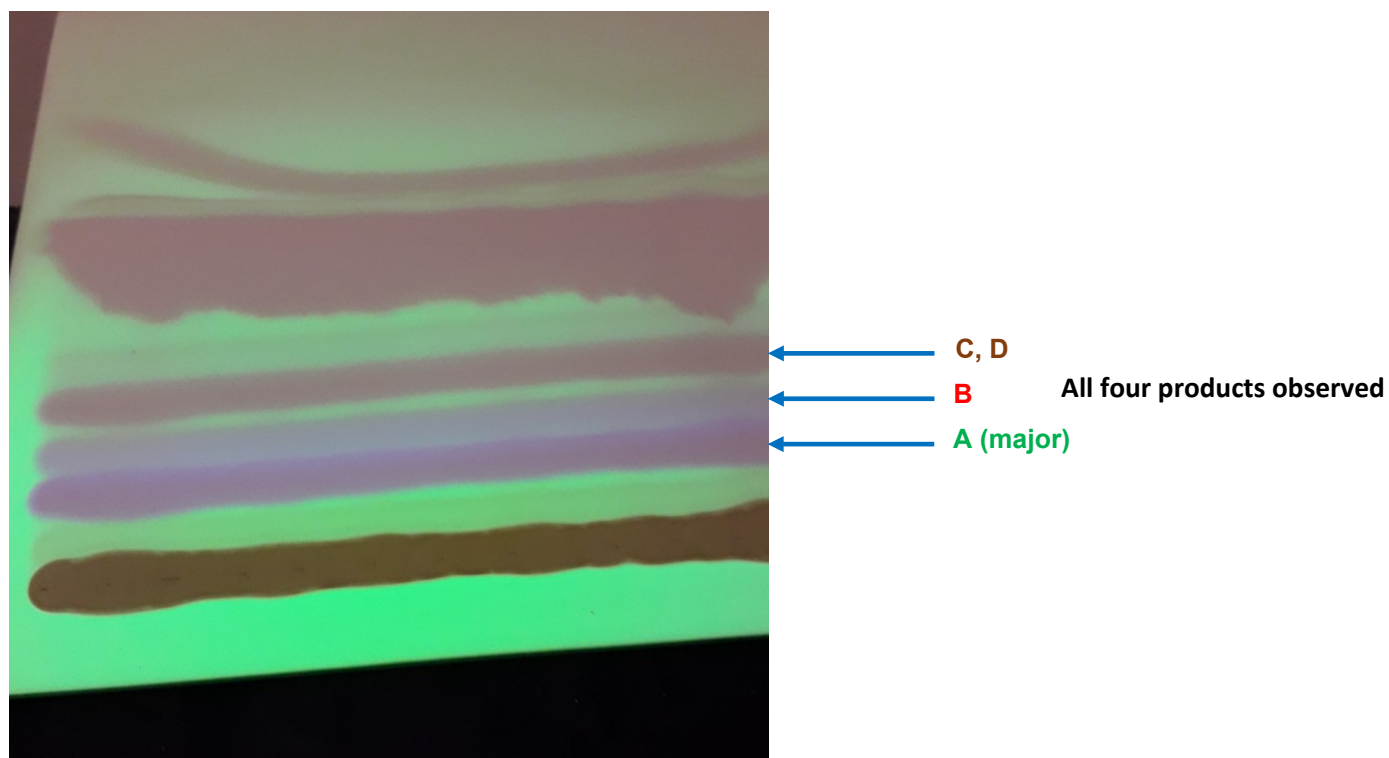

TLC condition: Petroleum ether/2-propanol (90:10)

# NMR & HRMS spectra

## 3aa

### <sup>1</sup>H spectra of 3aa in MeOD

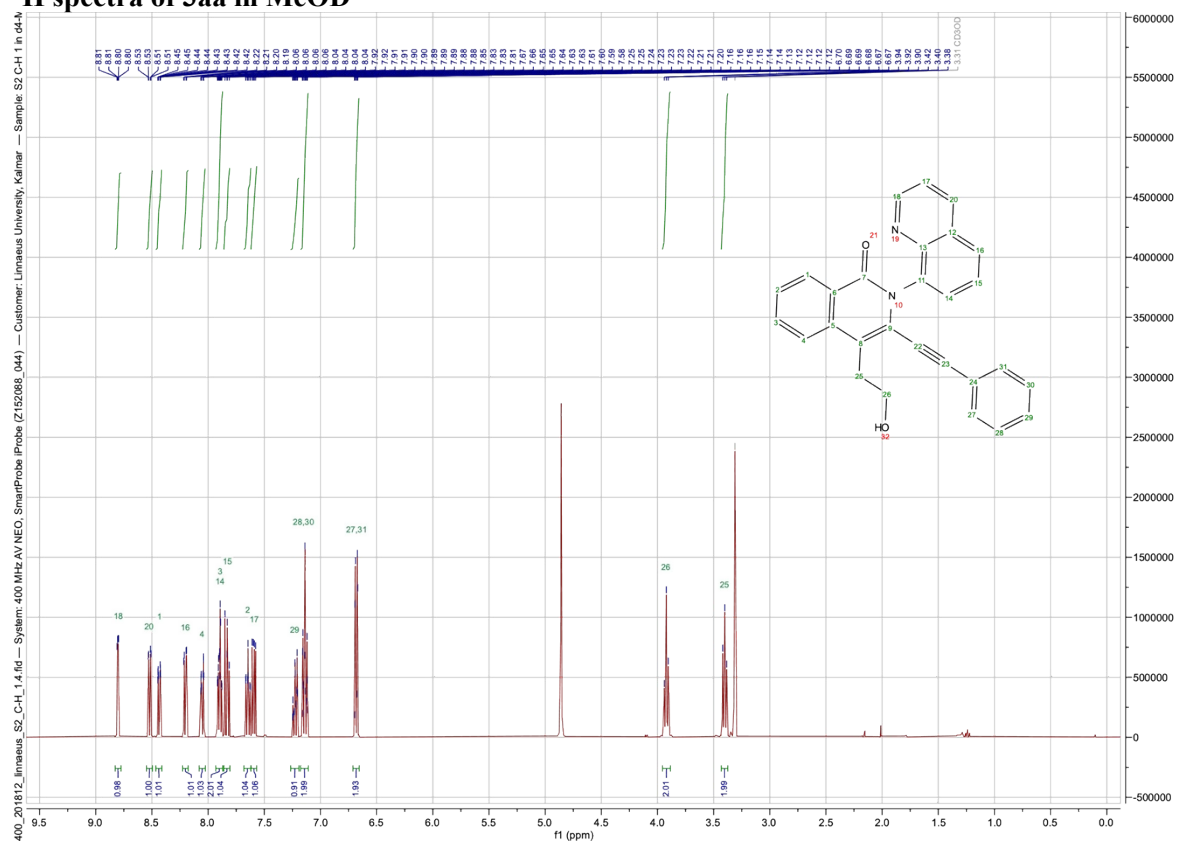

### <sup>13</sup>C spectra of 3aa in MeOD



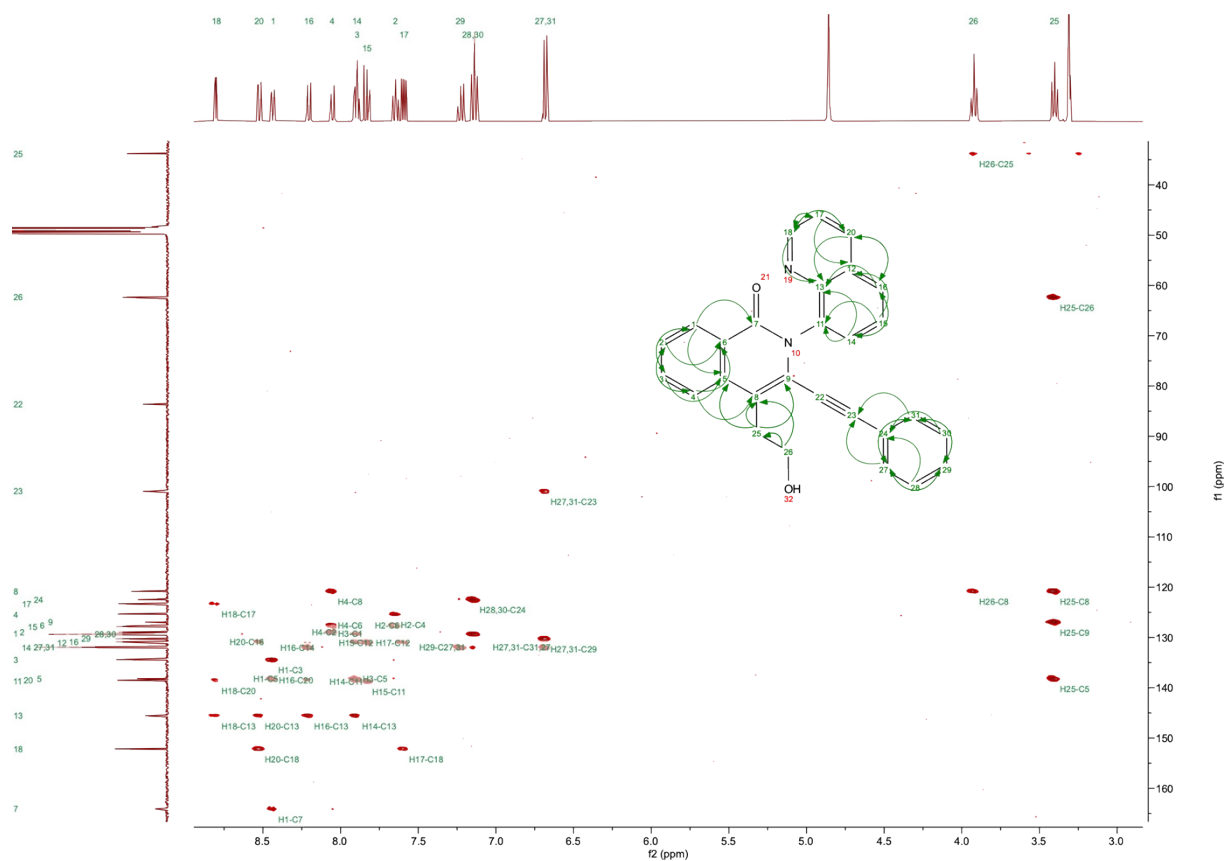

### COSY spectra of 3aa in MeOD

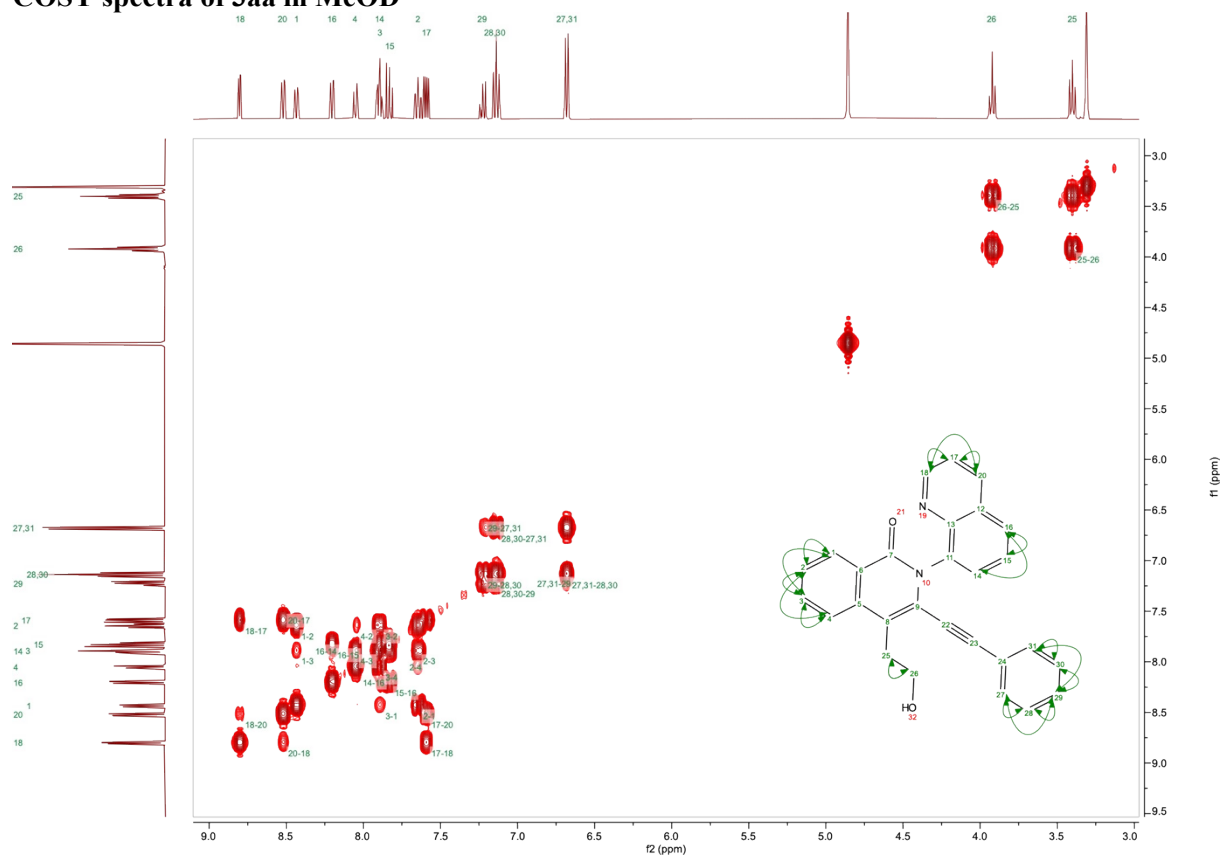

# NOESY spectra of 3aa in MeOD

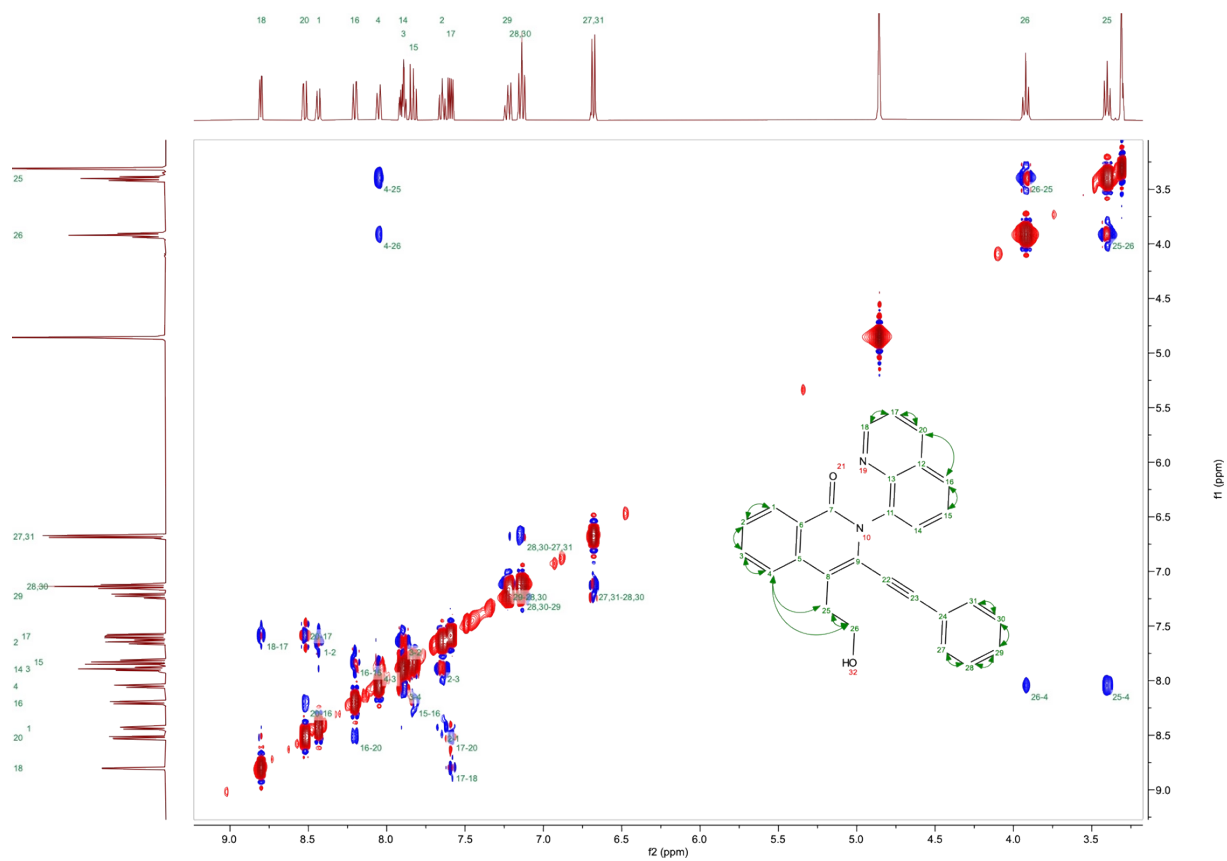

### HRMS spectra of 3aa

DCM-> MEOH (2% H2O, 0.1% FA), CV40

210316\_HRMS\_IN\_KS\_S2 CH-1 81 (1.386) AM2 (Ar,22500.0,556.28,0.00); Cm (30:116)

TOF MS ES+  
5.97e6

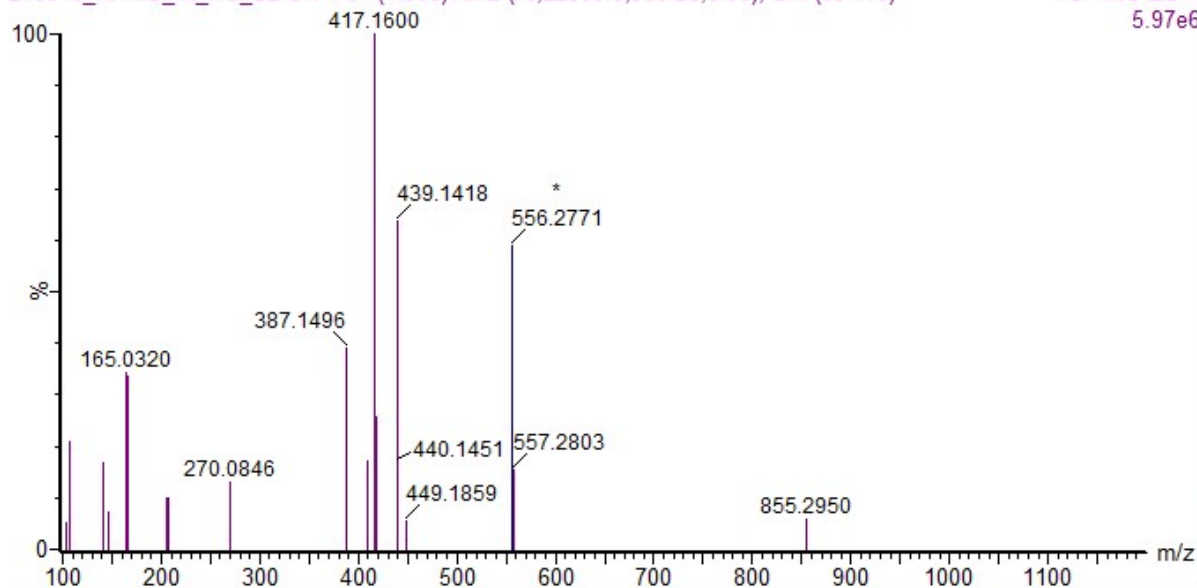

#### Single Mass Analysis

Tolerance = 2.0 mDa / DBE: min = -0.5, max = 100.0

Element prediction: Off

Number of isotope peaks used for i-FIT = 3

Monoisotopic Mass, Even Electron Ions

163 formula(e) evaluated with 2 results within limits (all results (up to 1000) for each mass)

Elements Used:

| Mass     | Calc. Mass | mDa  | PPM  | DBE  | Formula       | i-FIT Norm | Fit Conf % | C  | H  | N | O | Na |
|----------|------------|------|------|------|---------------|------------|------------|----|----|---|---|----|
| 417.1600 | 417.1603   | -0.3 | -0.7 | 19.5 | C28 H21 N2 O2 | 0.501      | 60.57      | 28 | 21 | 2 | 2 |    |
|          | 417.1619   | -1.9 | -4.6 | 20.5 | C31 H22 Na    | 0.931      | 39.43      | 31 | 22 |   |   | 1  |

DCM-> MEOH (2% H2O, 0.1% FA), CV40

210316\_HRMS\_IN\_KS\_S2 CH-1 81 (1.386) AM2 (Ar,22500.0,556.28,0.00); Cm (30:116)

TOF MS ES+  
5.97e+006

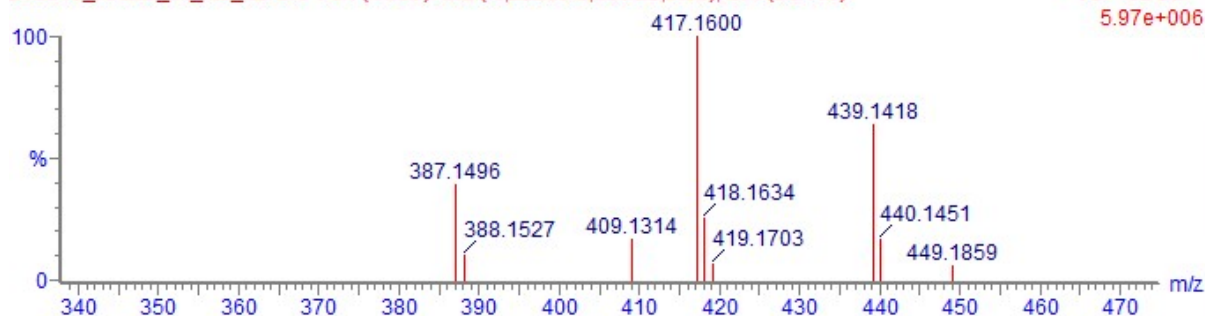



### 3ba

### <sup>1</sup>H spectra of 3ba in DMSO

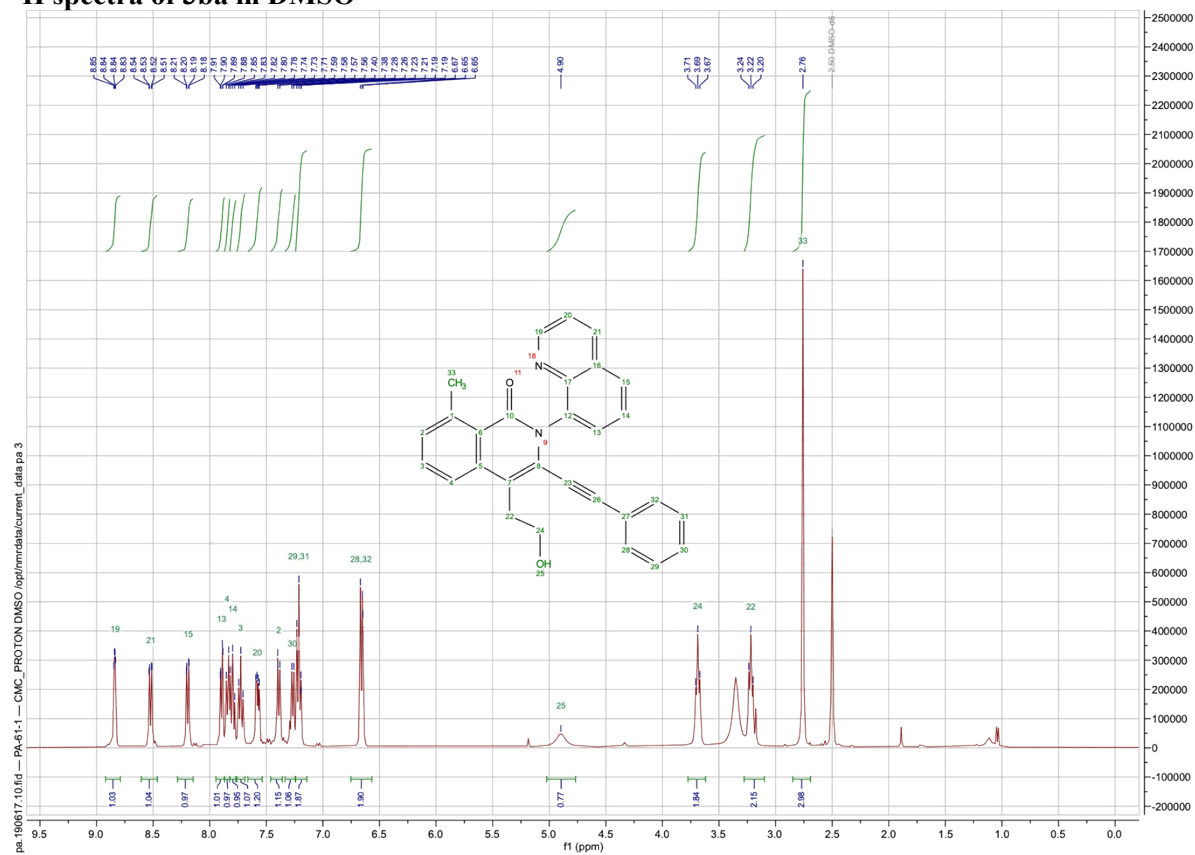

### <sup>13</sup>C spectra of 3ba in DMSO

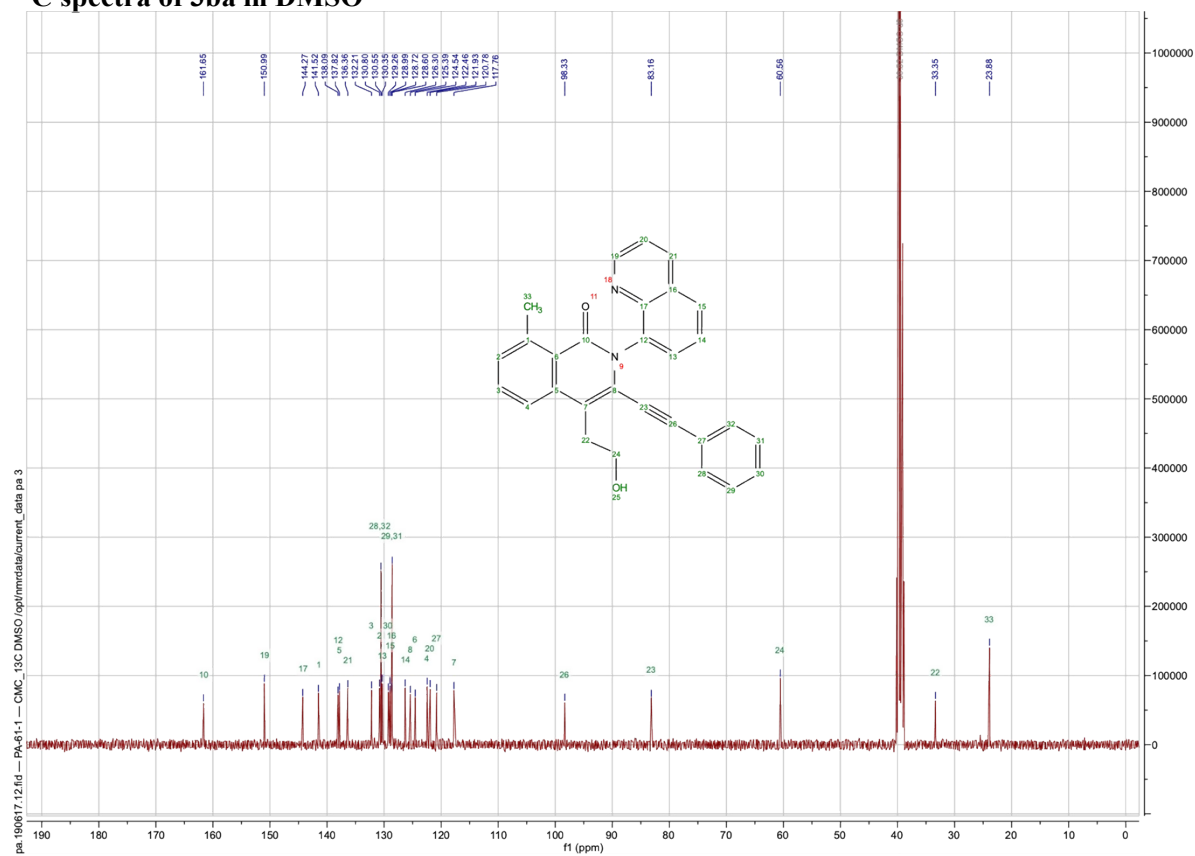

### HSQC spectra of 3ba in DMSO

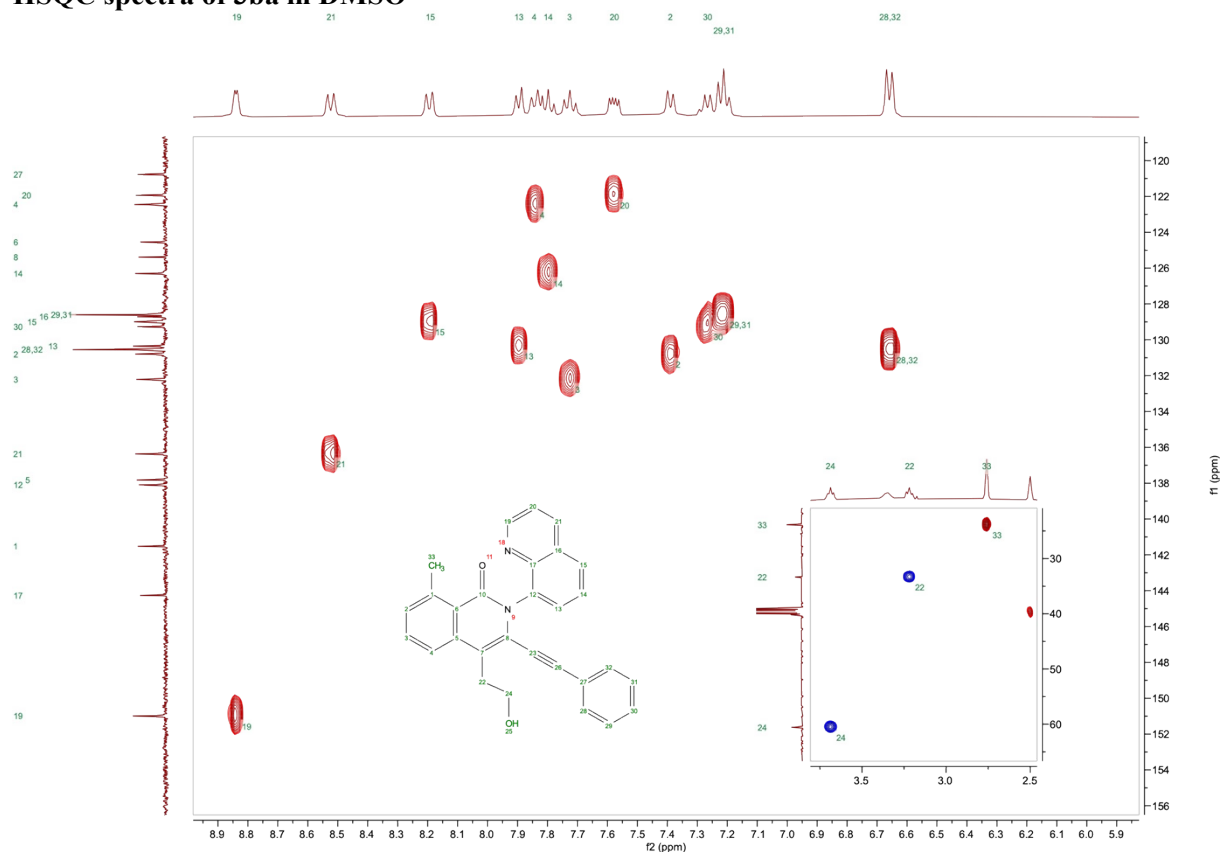

### HMBC spectra of 3ba in DMSO

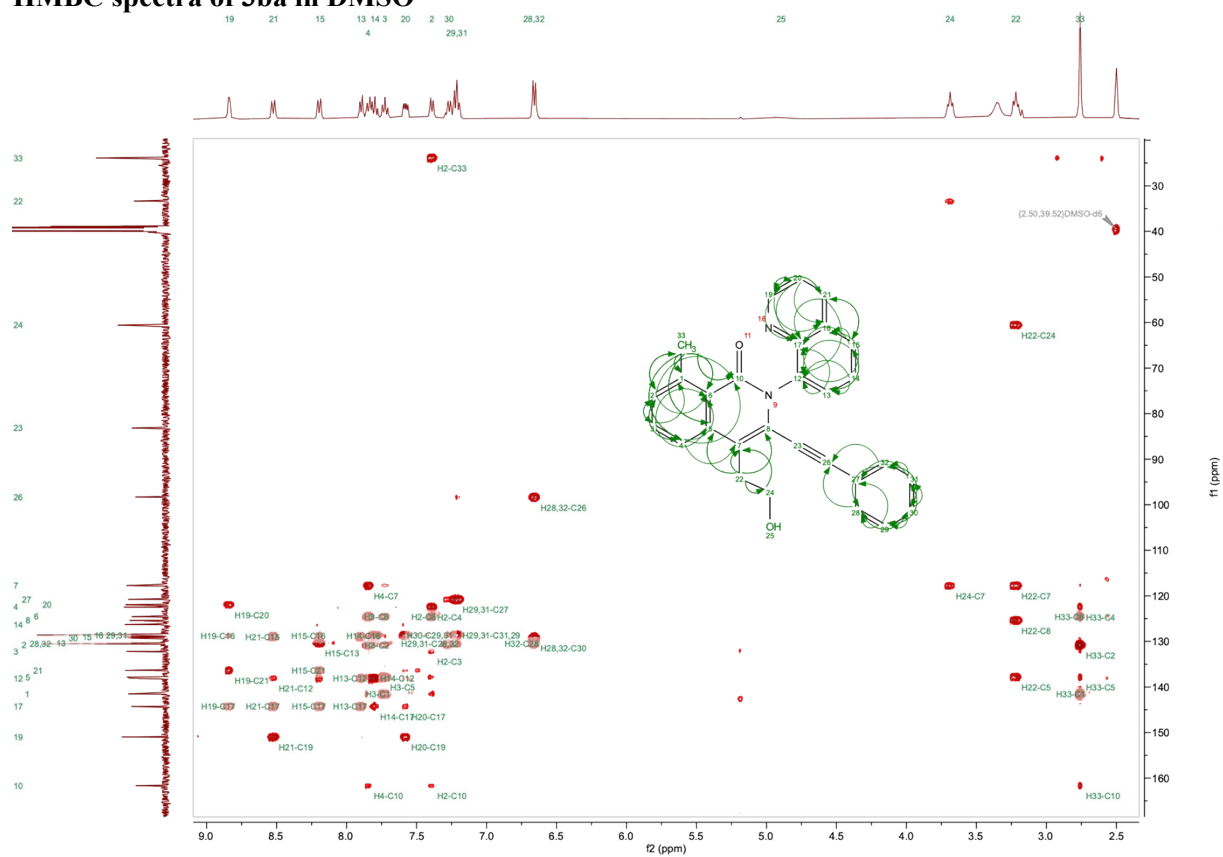

## COSY spectra of 3ba in DMSO

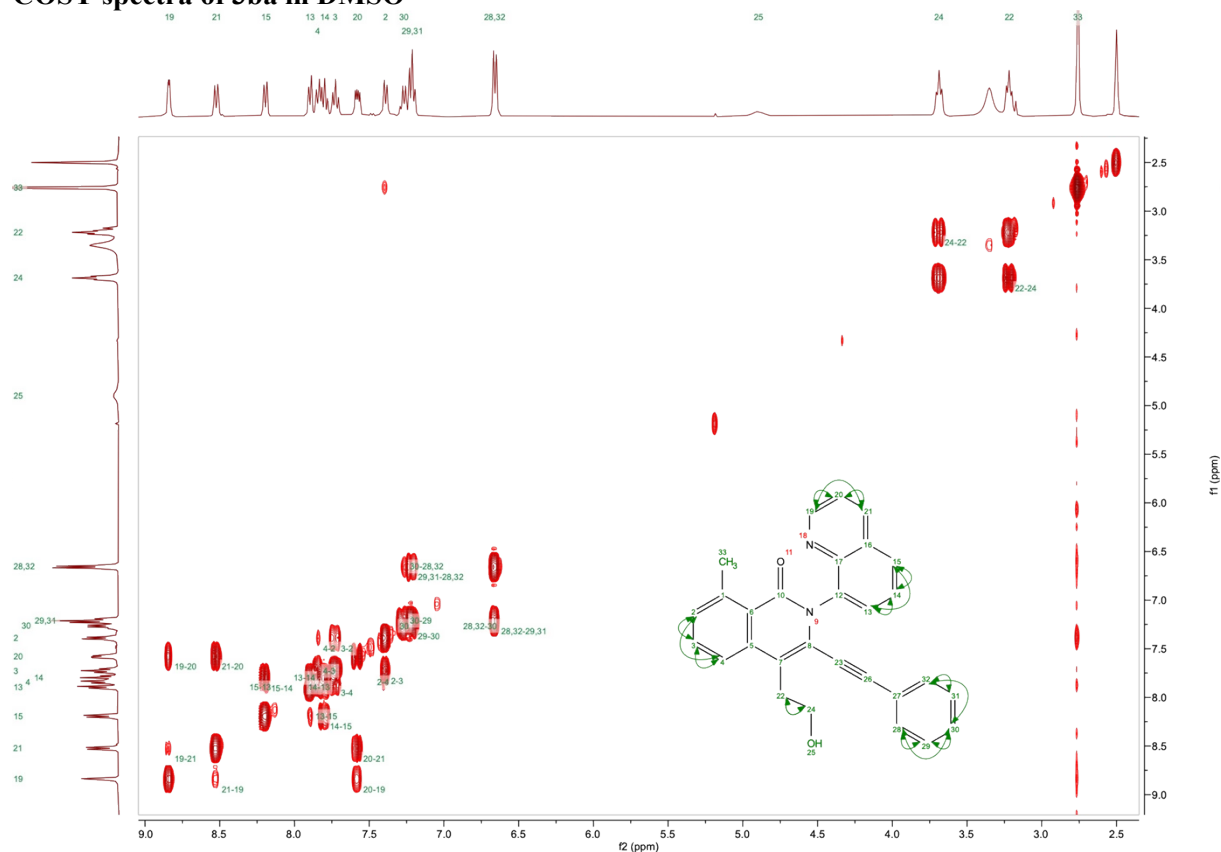

## HRMS spectra of 3ba

### Spectrum Plot Report

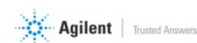

| Name           | 17122019-6-KRR | Rack Pos.    |                            | Instrument | Instrument 1    | Operator          |                     |
|----------------|----------------|--------------|----------------------------|------------|-----------------|-------------------|---------------------|
| Inj. Vol. (ul) | 2              | Plate Pos.   |                            | IRM Status | All ions missed | Acq. Time (Local) | 17-12-2019 09:35:50 |
| Data File      | PA-61-1.d      | Method (Acq) | Direct Infusion_HPLC-NEW.m | Comment    |                 | (UTC+05:30)       |                     |

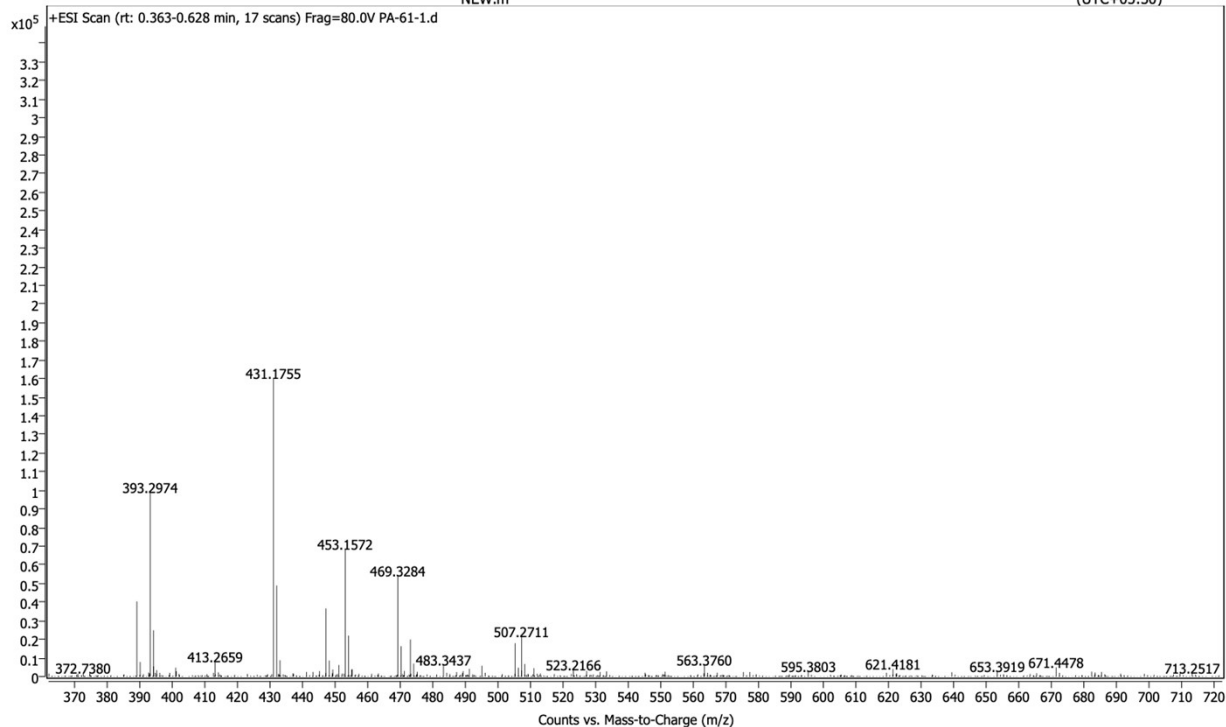

# 3ca

## <sup>1</sup>H spectra of 3ca in DMSO

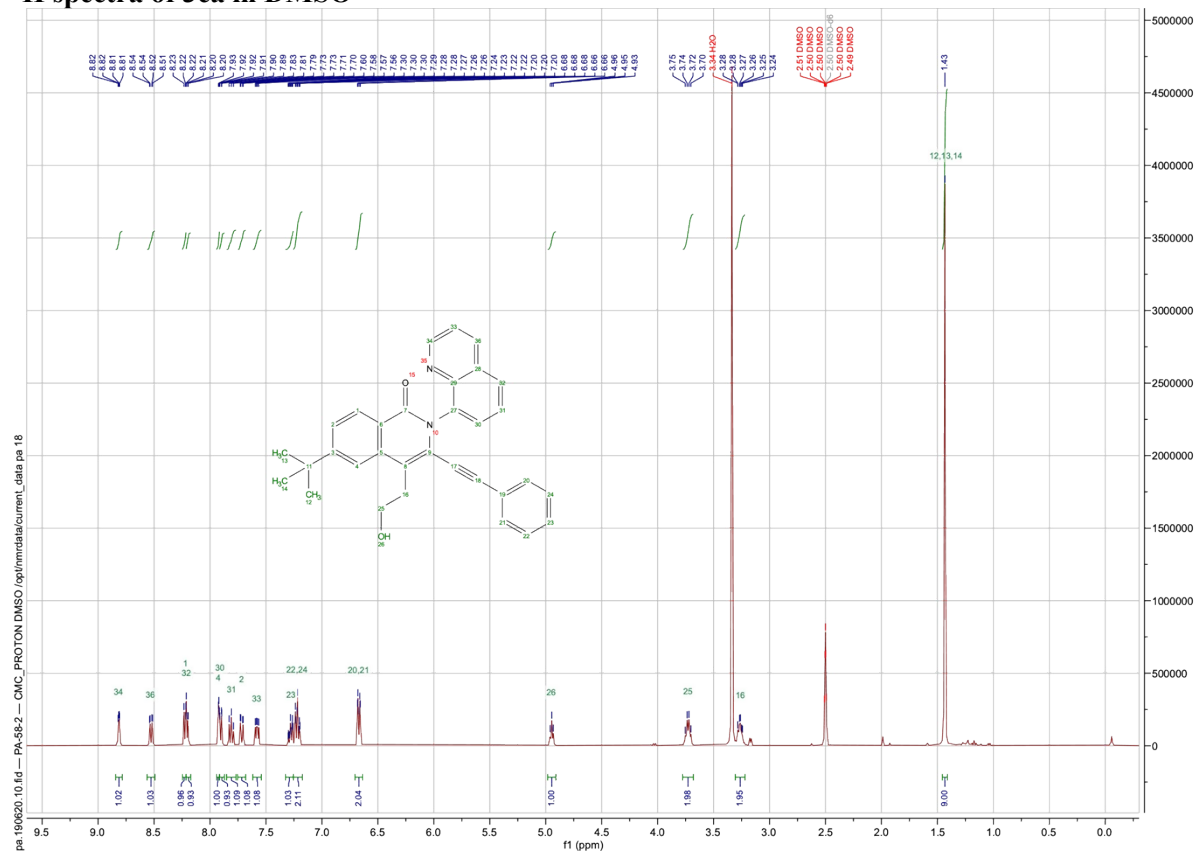

## <sup>13</sup>C spectra of 3ca in DMSO

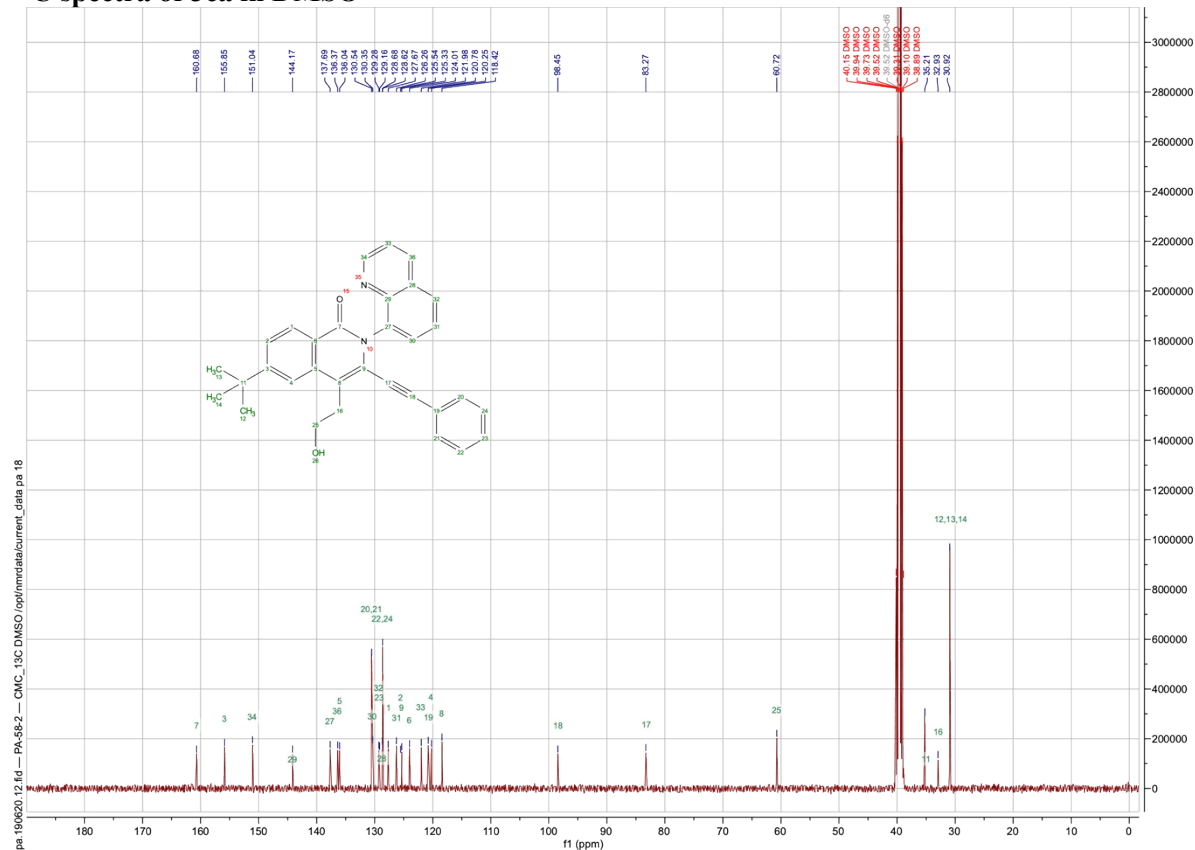

### HSQC spectra of 3ca in DMSO

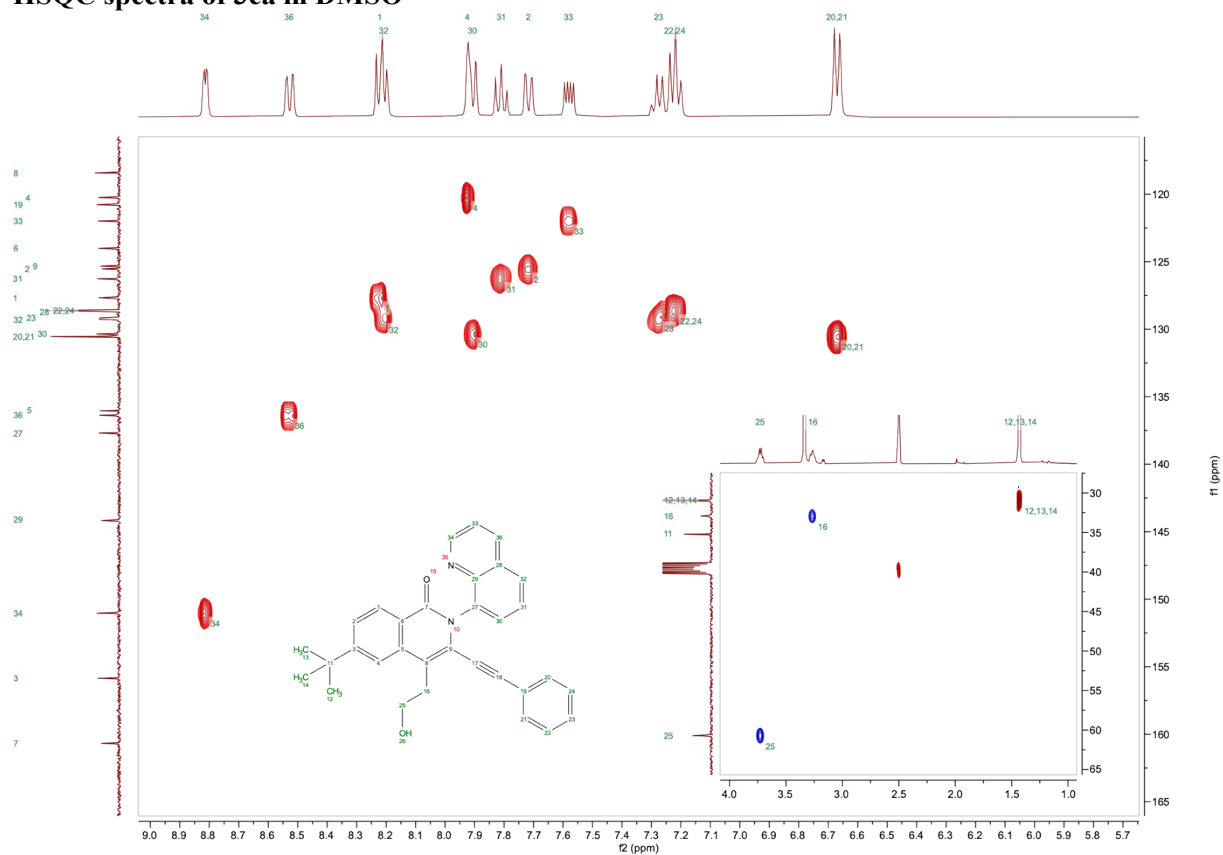

### HMBC spectra of 3ca in DMSO

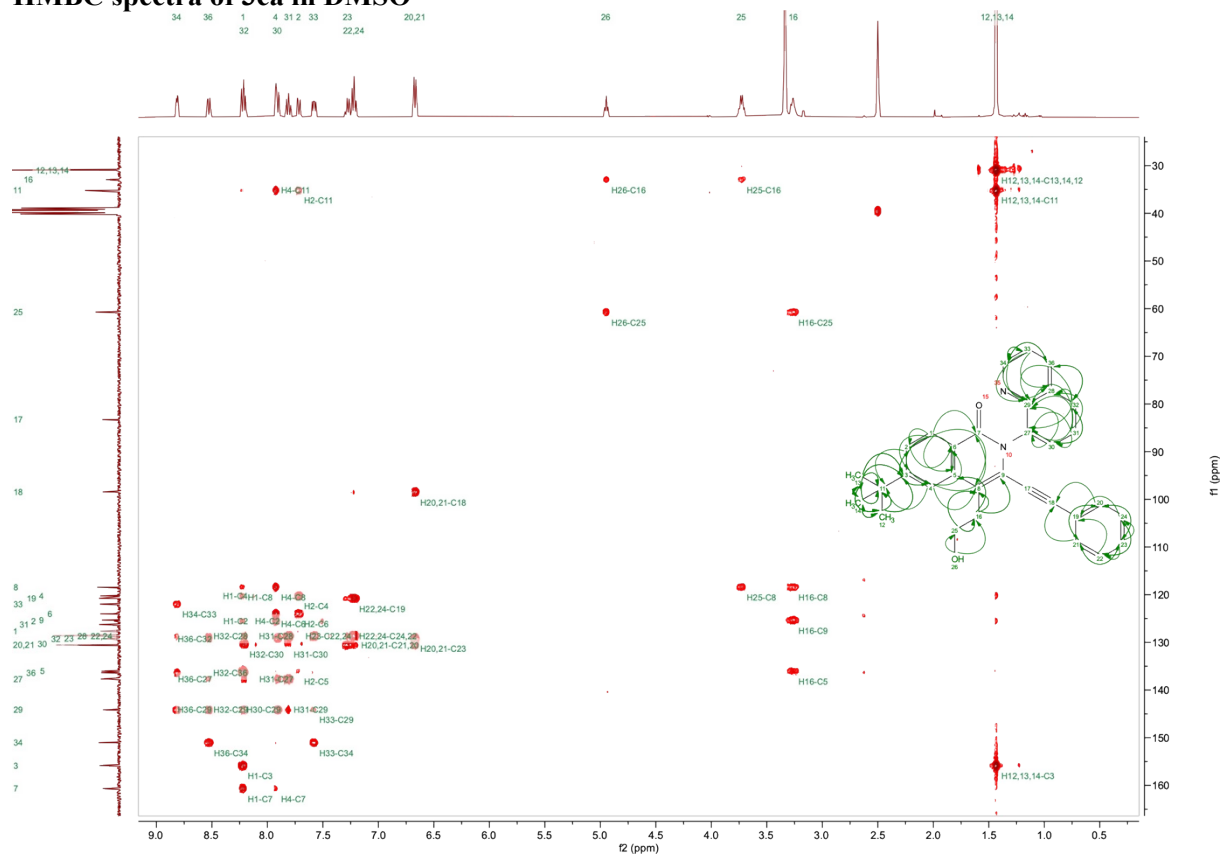

# COSY spectra of 3ca in DMSO

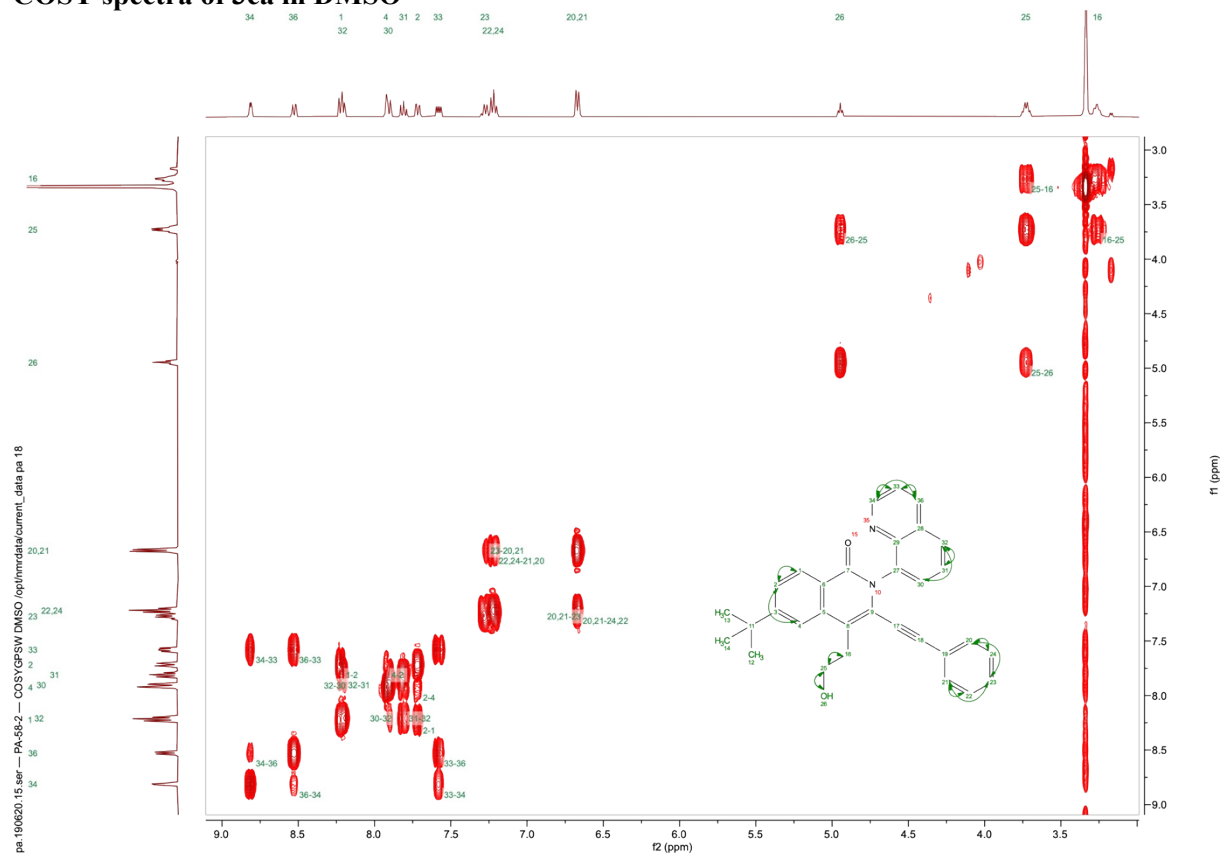

## HRMS spectra of 3ca

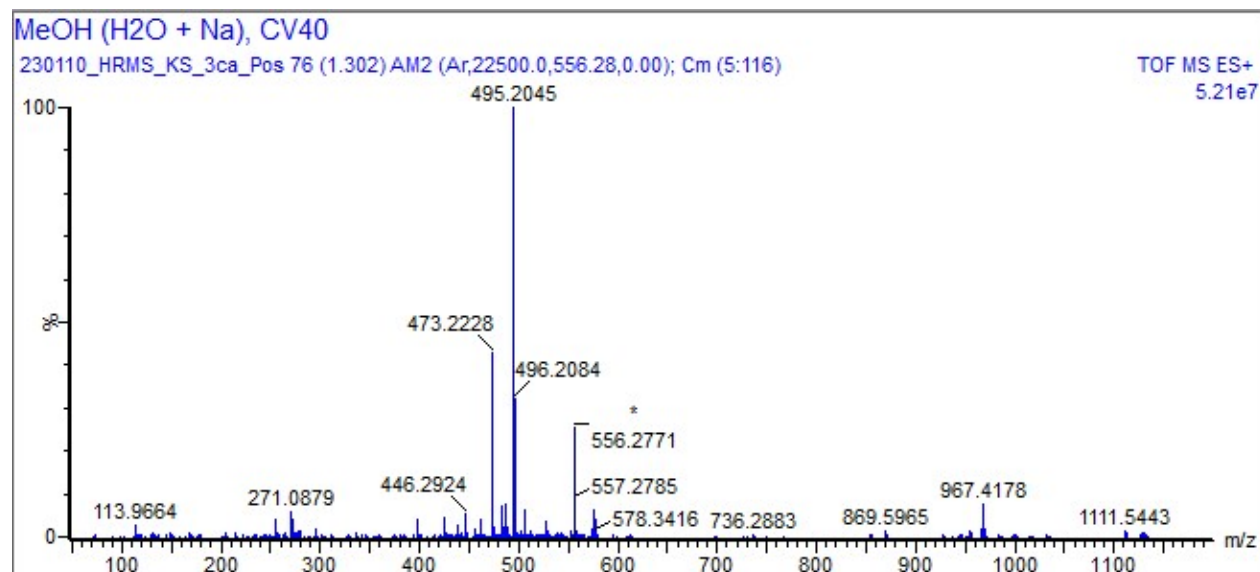

### Single Mass Analysis

Tolerance = 2.0 mDa / DBE: min = -1.5, max = 100.0

Element prediction: Off

Number of isotope peaks used for i-FIT = 2

Monoisotopic Mass, Even Electron Ions

104 formula(e) evaluated with 1 results within limits (all results (up to 1000) for each mass)

Elements Used:

C: 1-40      H: 1-40      N: 1-4      O: 1-4      Na: 0-1

| Mass     | Calc. Mass | mDa  | PPM  | DBE  | Formula                                                       | i..  | Fit Conf % | C  | H  | N | O | Na |
|----------|------------|------|------|------|---------------------------------------------------------------|------|------------|----|----|---|---|----|
| 473.2228 | 473.2229   | -0.1 | -0.2 | 19.5 | C <sub>32</sub> H <sub>29</sub> N <sub>2</sub> O <sub>2</sub> | 2... | n.a/a      | 32 | 29 | 2 | 2 |    |

MeOH (H<sub>2</sub>O + Na), CV40

230110\_HRMS\_KS\_3ca\_Pos 76 (1.302)AM2 (Ar,22500.0,556.28,0.00); Cm (5:116)

TOF MS ES+  
2.23e+007

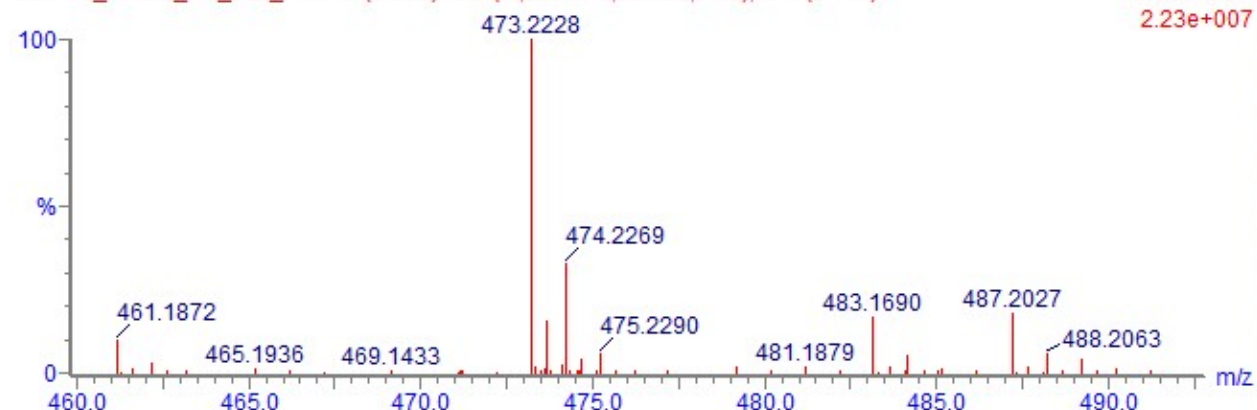

### 3da

### <sup>1</sup>H spectra of 3da in DMSO

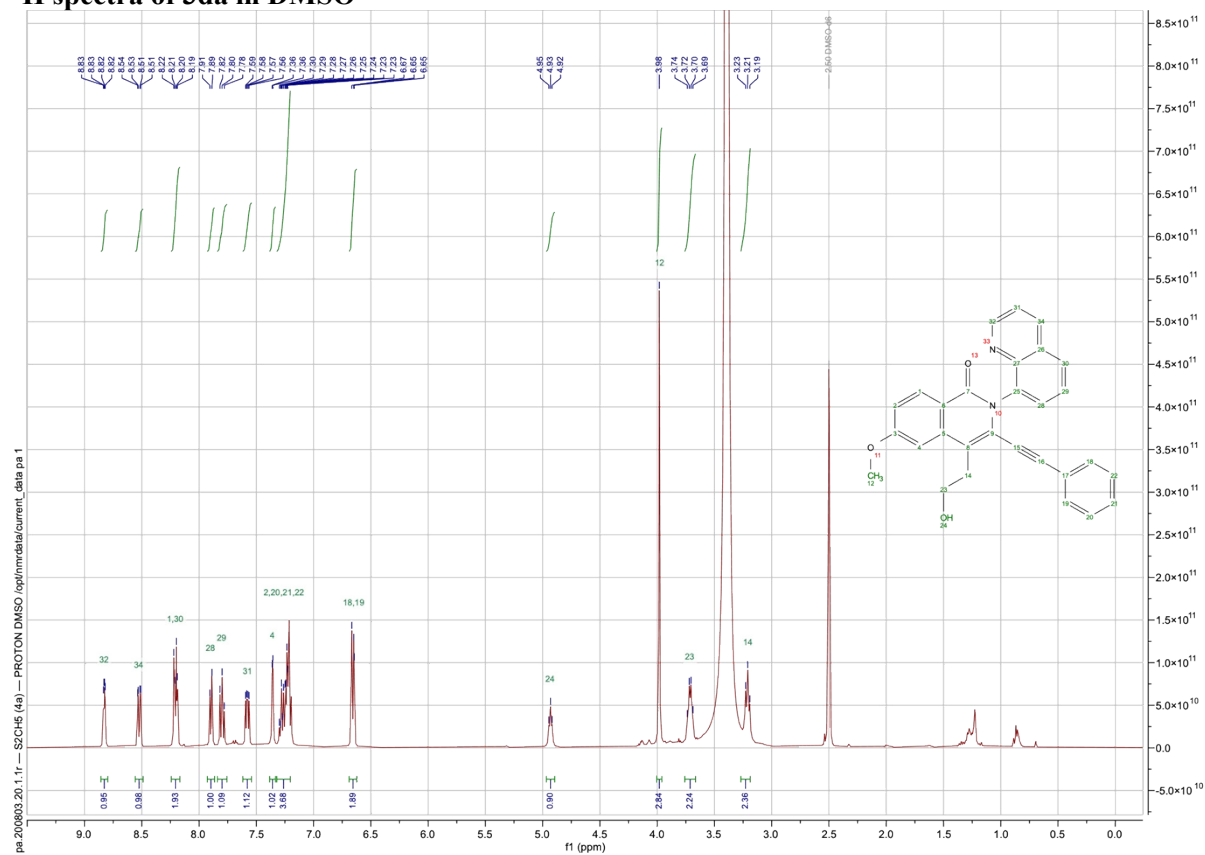

### <sup>13</sup>C spectra of 3da in DMSO

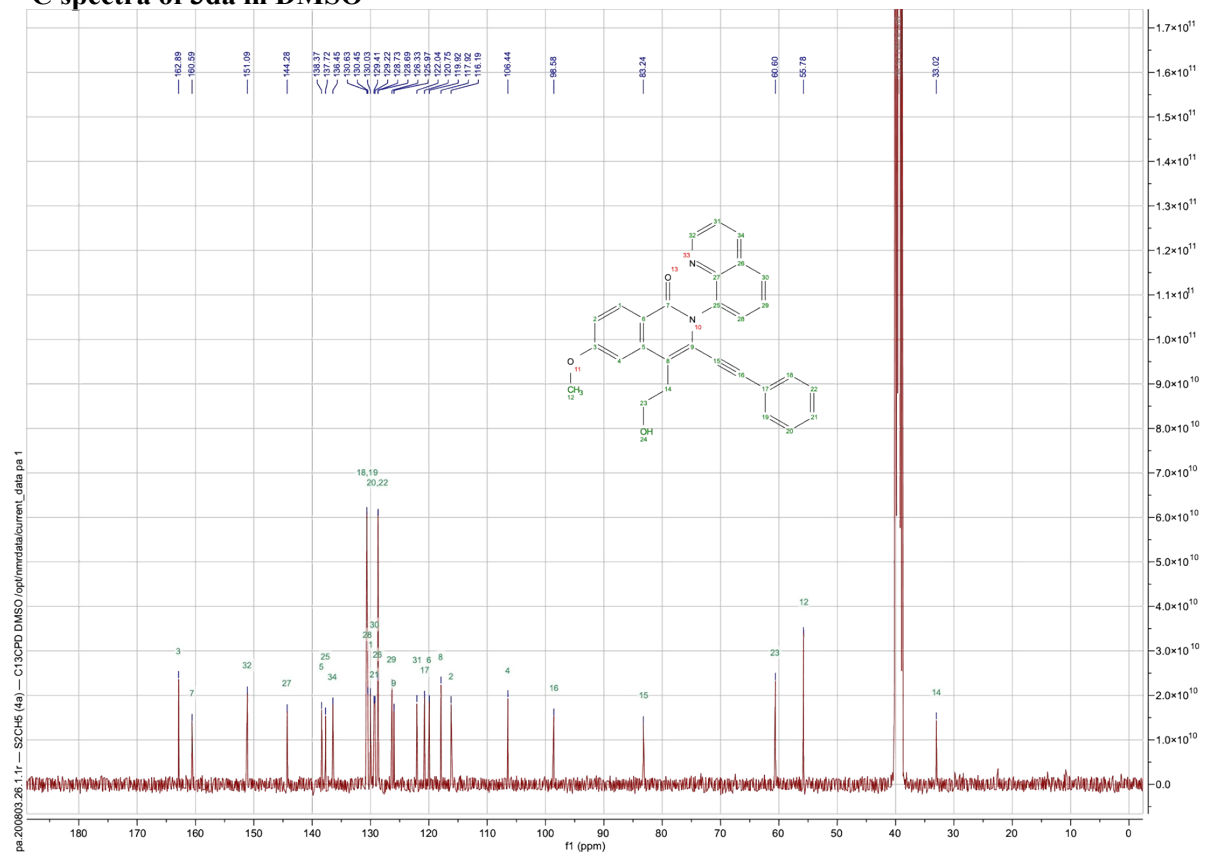



### HSQC spectra of 3da in DMSO

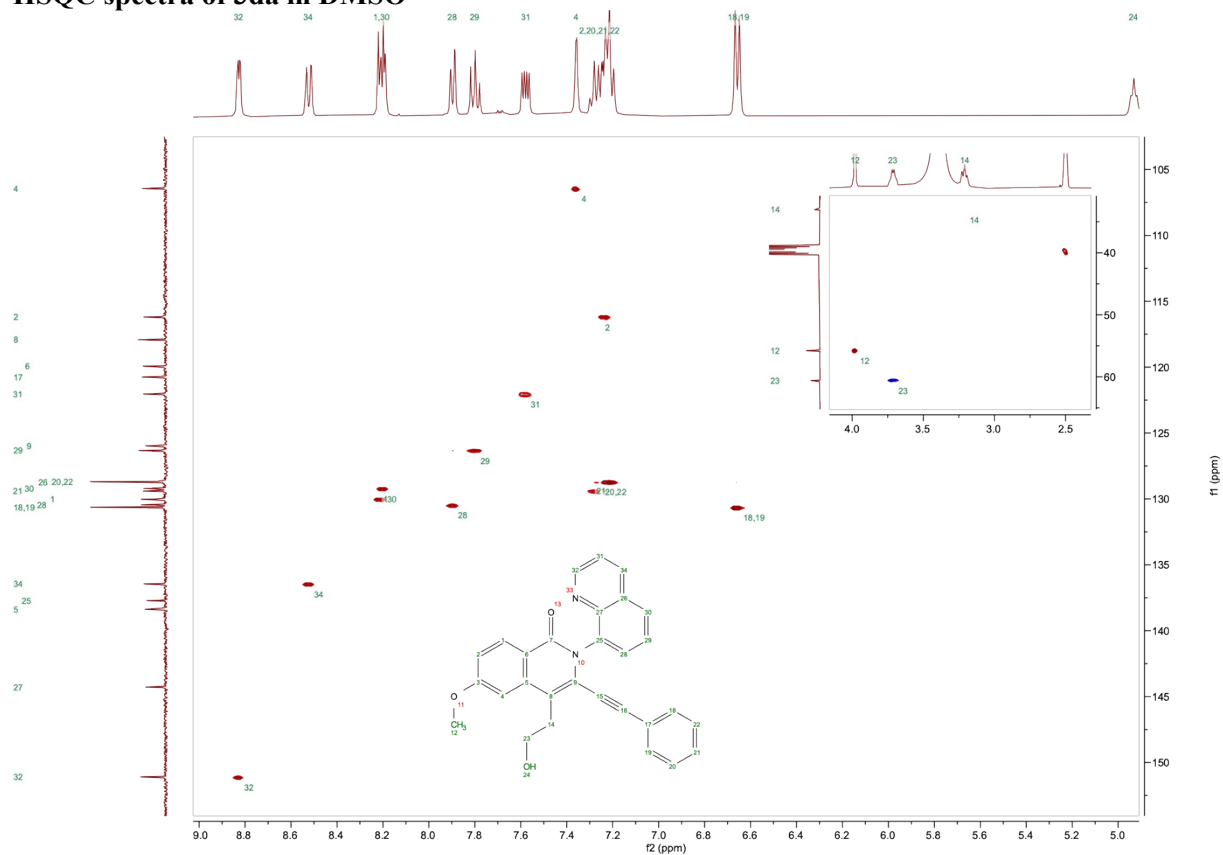

### HMBC spectra of 3da in DMSO

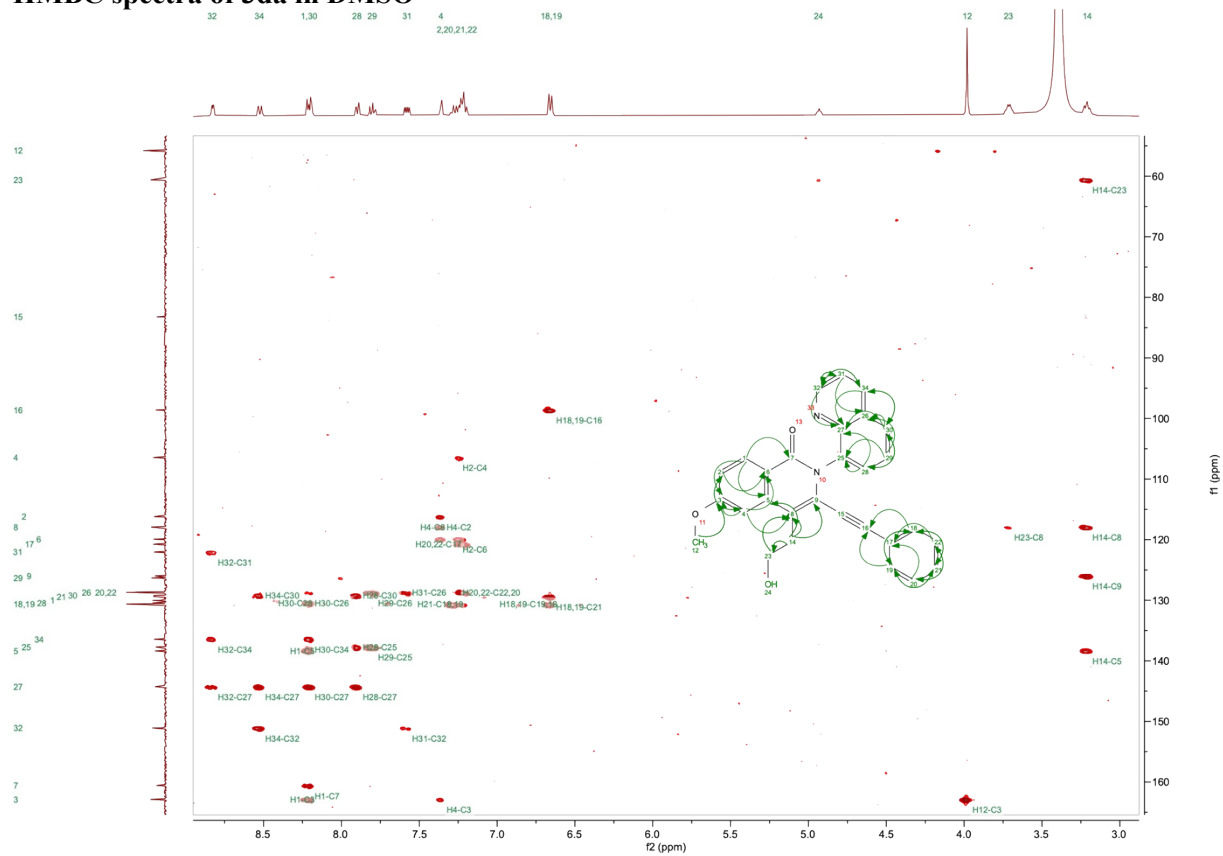

# COSY spectra of 3da in DMSO

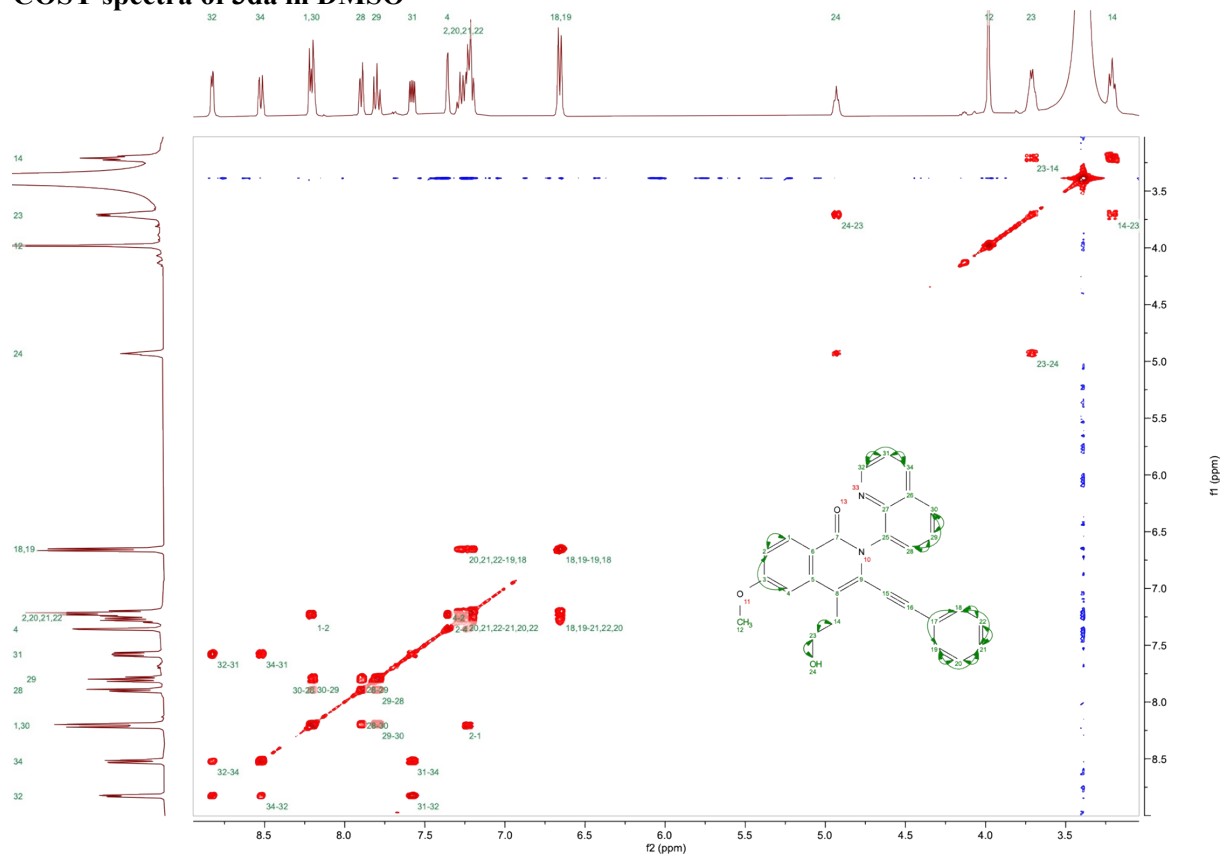

## HRMS spectra of 3da

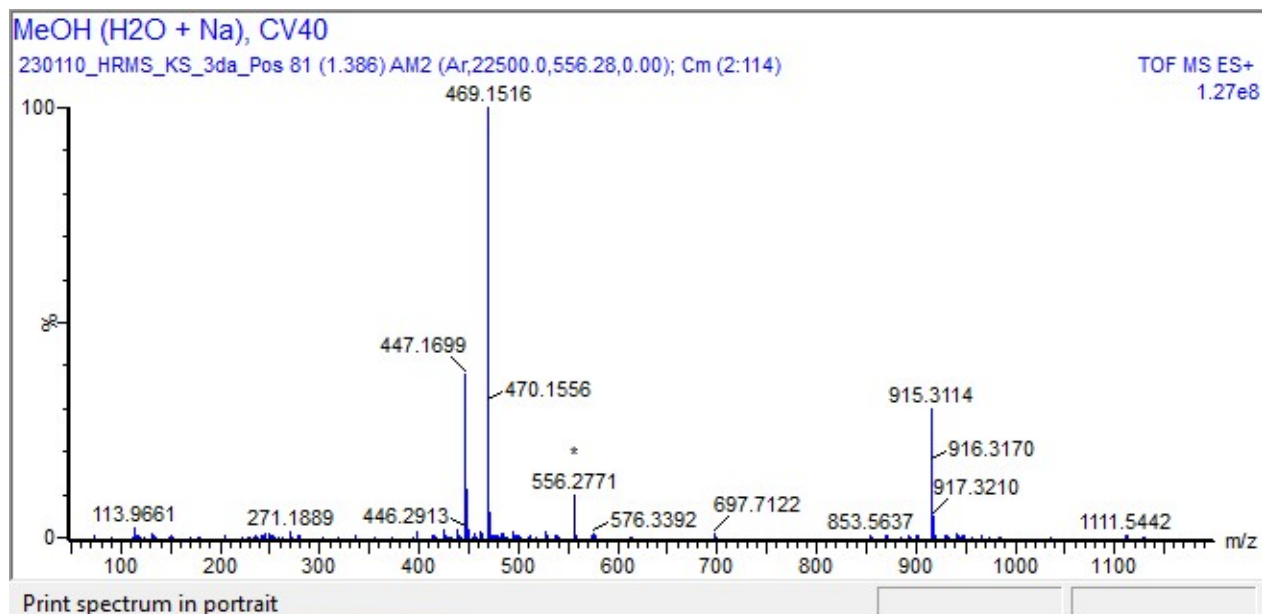

### Single Mass Analysis

Tolerance = 2.0 mDa / DBE: min = -1.5, max = 100.0

Element prediction: Off

Number of isotope peaks used for i-FIT = 2

Monoisotopic Mass, Even Electron Ions

106 formula(e) evaluated with 2 results within limits (all results (up to 1000) for each mass)

Elements Used:

C: 1-40      H: 1-40      N: 1-4      O: 1-4      Na: 0-1

| Mass     | Calc. Mass | mDa  | PPM  | DBE  | Formula                                                          | Fit Conf % | C  | H  | N | O | N |
|----------|------------|------|------|------|------------------------------------------------------------------|------------|----|----|---|---|---|
| 447.1699 | 447.1709   | -1.0 | -2.2 | 19.5 | C <sub>29</sub> H <sub>23</sub> N <sub>2</sub> O <sub>3</sub>    | 2.50.31    | 29 | 23 | 2 | 3 |   |
|          | 447.1685   | 1.4  | 3.1  | 16.5 | C <sub>27</sub> H <sub>24</sub> N <sub>2</sub> O <sub>3</sub> Na | 2.099.69   | 27 | 24 | 2 | 3 | 1 |

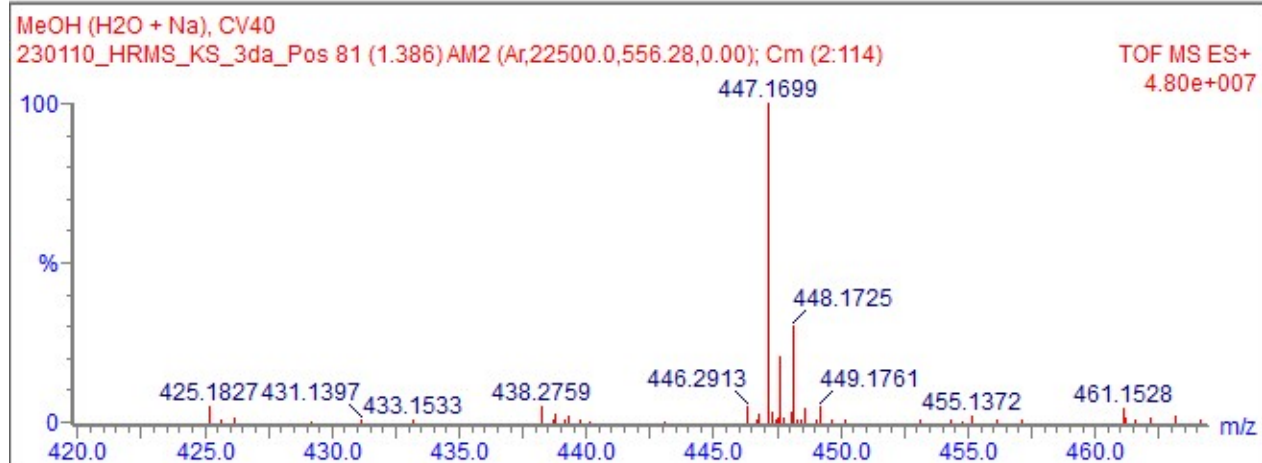



### HSQC spectra of 3ea in CDCl<sub>3</sub>

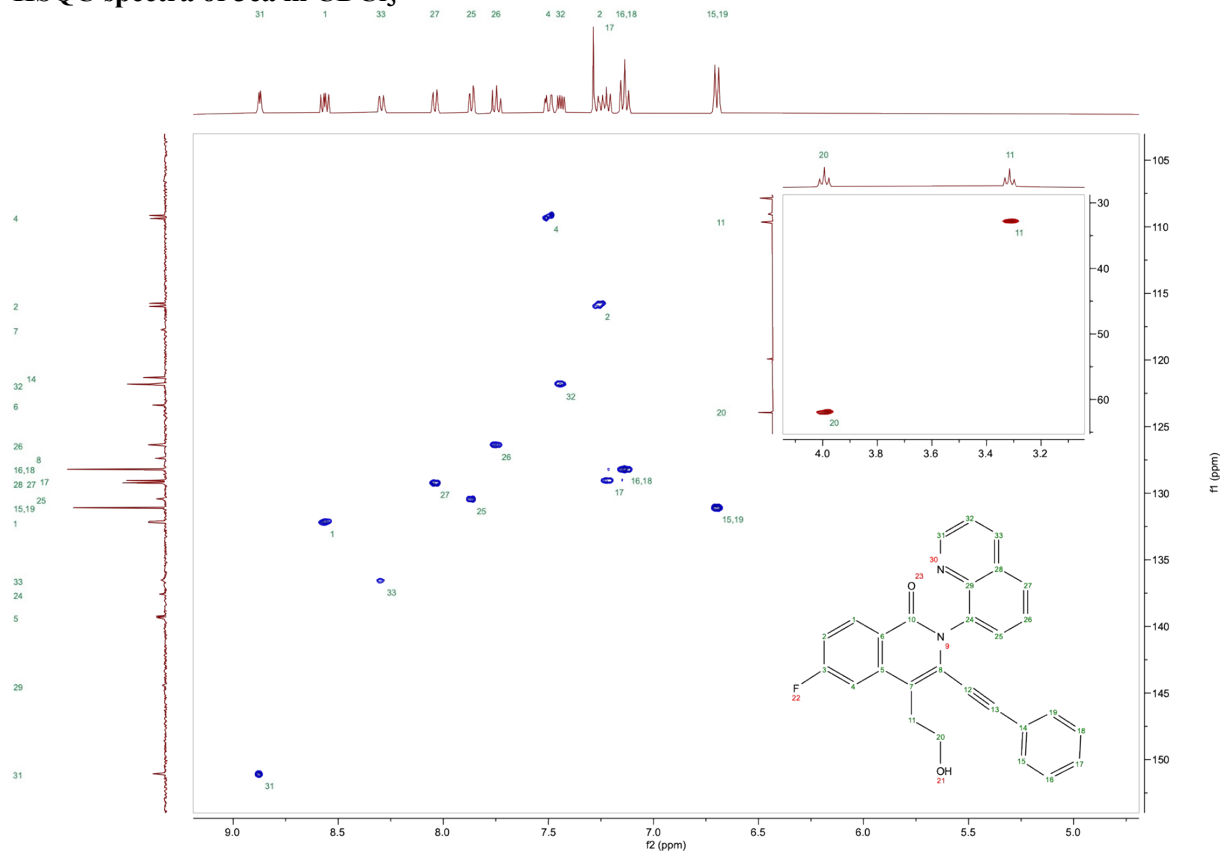

### HMBC spectra of 3ea in CDCl<sub>3</sub>

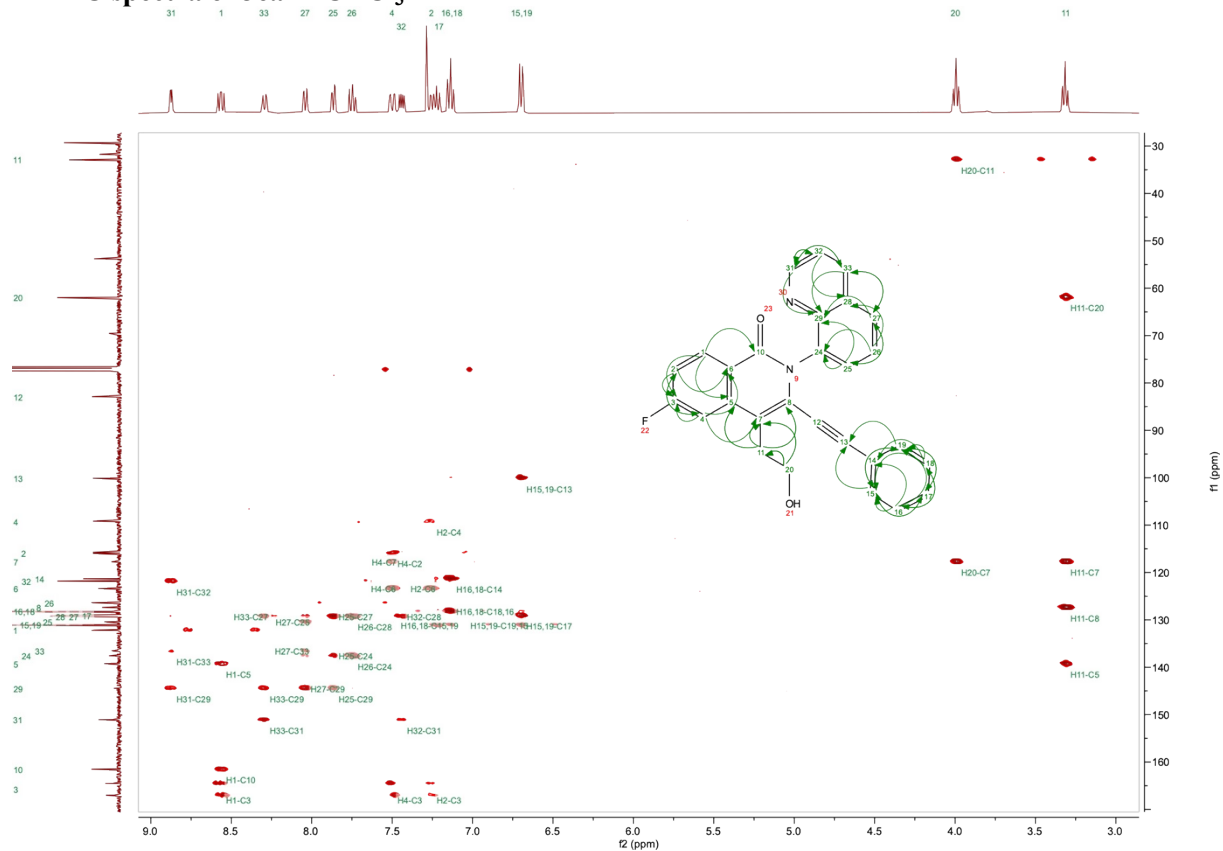

### COSY spectra of 3ea in CDCl<sub>3</sub>

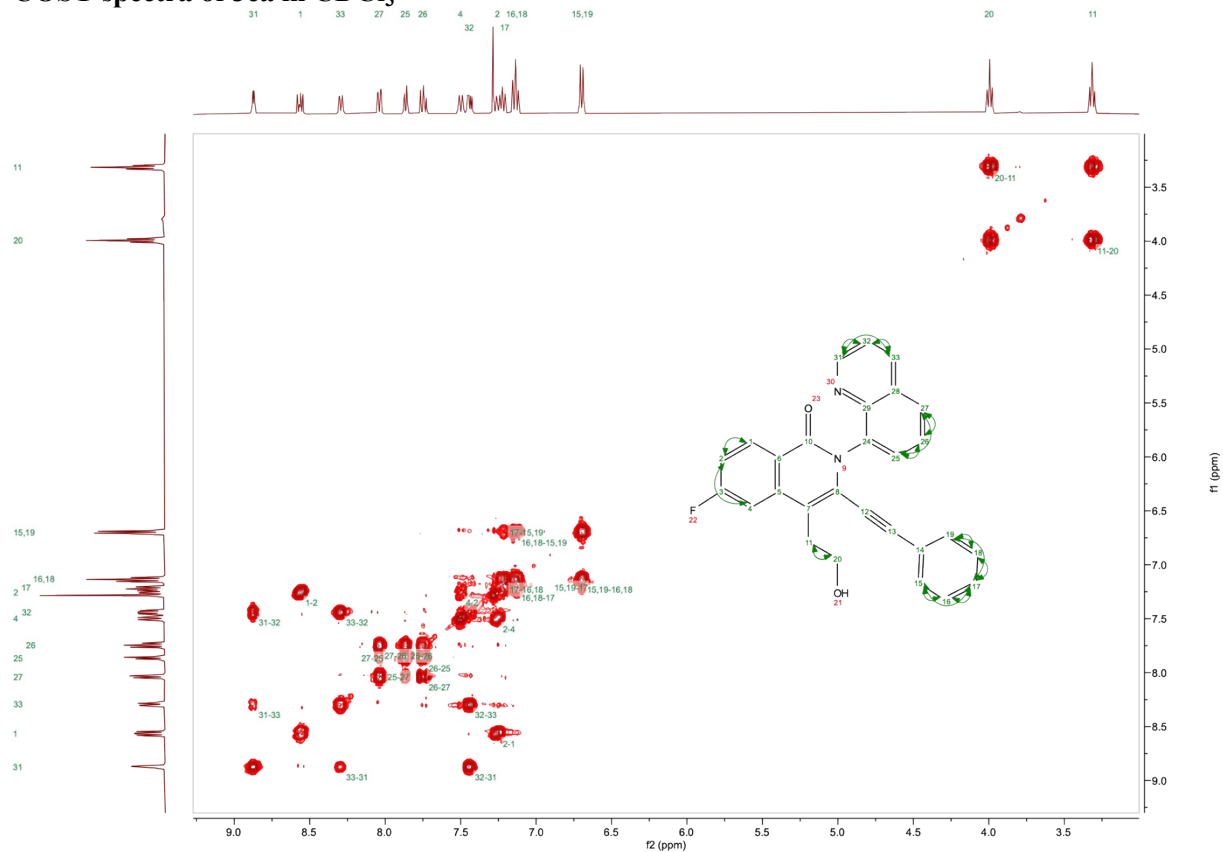

### NOESY spectra of 3ea in CDCl<sub>3</sub>

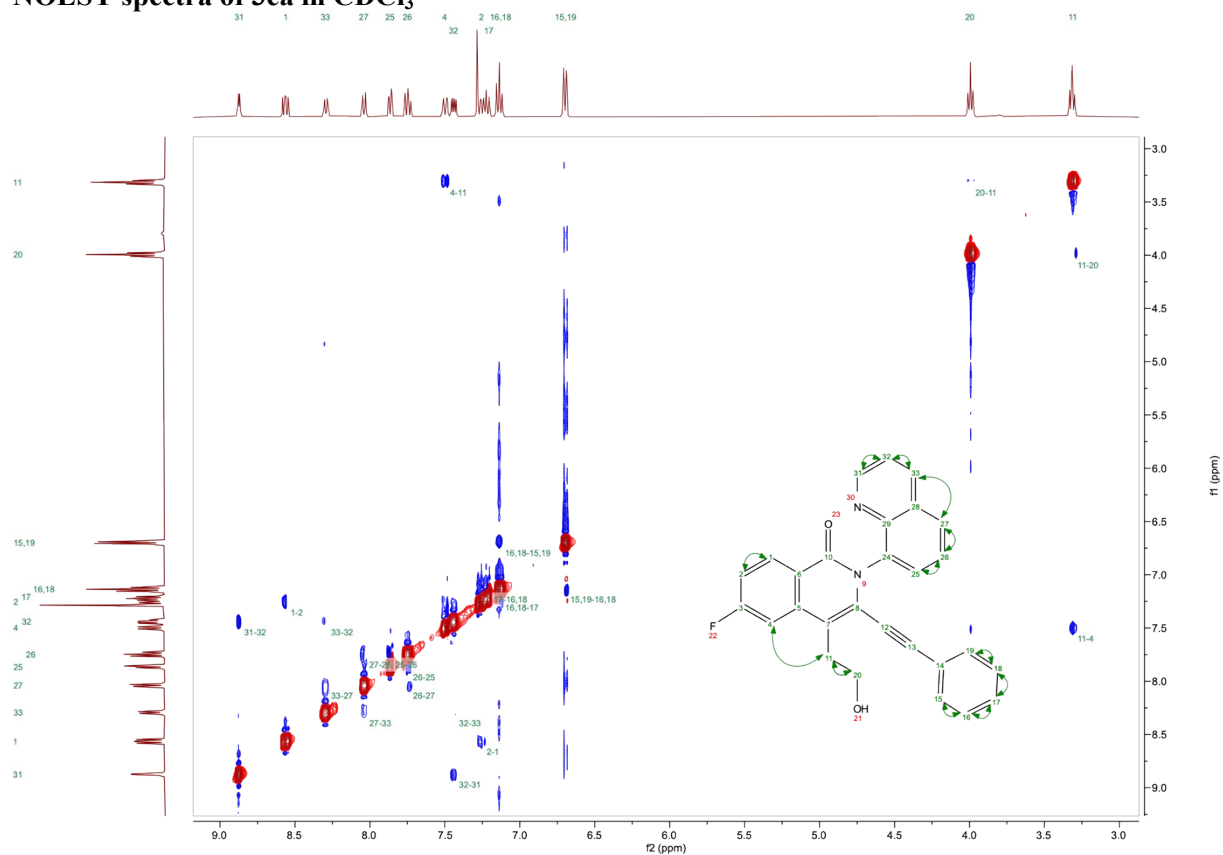

### HRMS spectra of 3ea

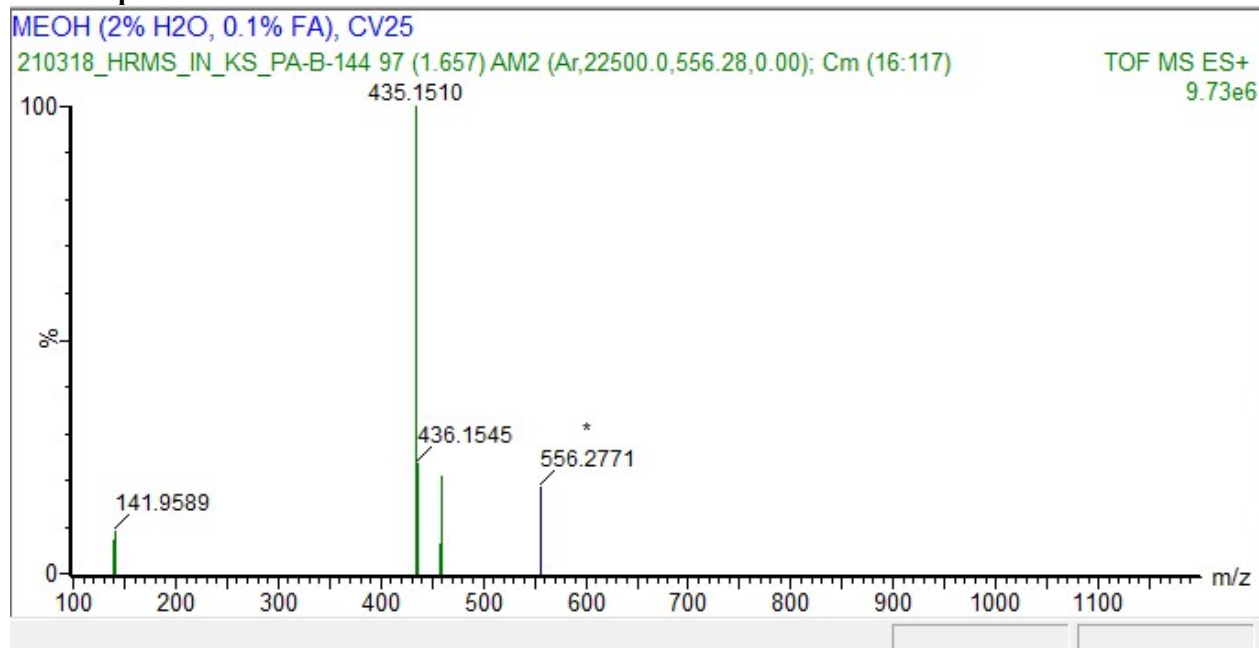

#### Single Mass Analysis

Tolerance = 2.0 mDa / DBE: min = -0.5, max = 100.0

Element prediction: Off

Number of isotope peaks used for i-FIT = 3

Monoisotopic Mass, Even Electron Ions

329 formula(e) evaluated with 3 results within limits (all results (up to 1000) for each mass)

Elements Used:

C: 0-50      H: 1-100      N: 0-3      O: 0-3      Na: 0-1      F: 0-1

| Mass     | Calc. Mass | mDa  | PPM  | DBE  | Formula                                                         | i..   | Fit Conf % | C  | H  | N | O | Na | F |
|----------|------------|------|------|------|-----------------------------------------------------------------|-------|------------|----|----|---|---|----|---|
| 435.1510 | 435.1509   | 0.1  | 0.2  | 19.5 | C <sub>28</sub> H <sub>20</sub> N <sub>2</sub> O <sub>2</sub> F | 40... | 70.65      | 28 | 20 | 2 | 2 |    | 1 |
|          | 435.1497   | 1.3  | 3.0  | 23.5 | C <sub>31</sub> H <sub>19</sub> N <sub>2</sub> O                | 4L... | 14.26      | 31 | 19 | 2 | 1 |    |   |
|          | 435.1525   | -1.5 | -3.4 | 20.5 | C <sub>31</sub> H <sub>21</sub> Na F                            | 4L... | 15.09      | 31 | 21 |   |   | 1  | 1 |

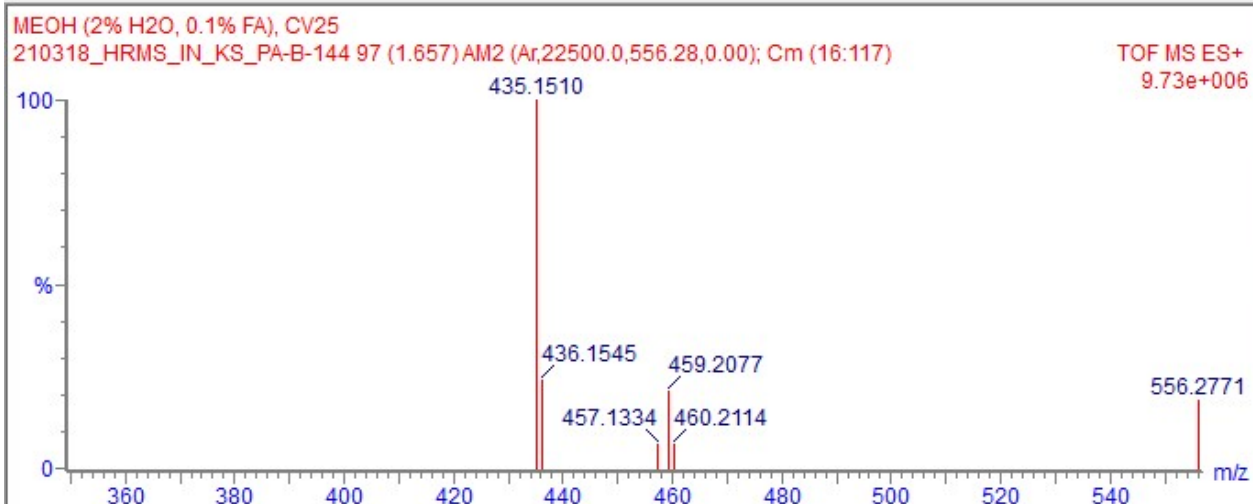

### 3fa

#### <sup>1</sup>H spectra of 3fa in CDCl<sub>3</sub>

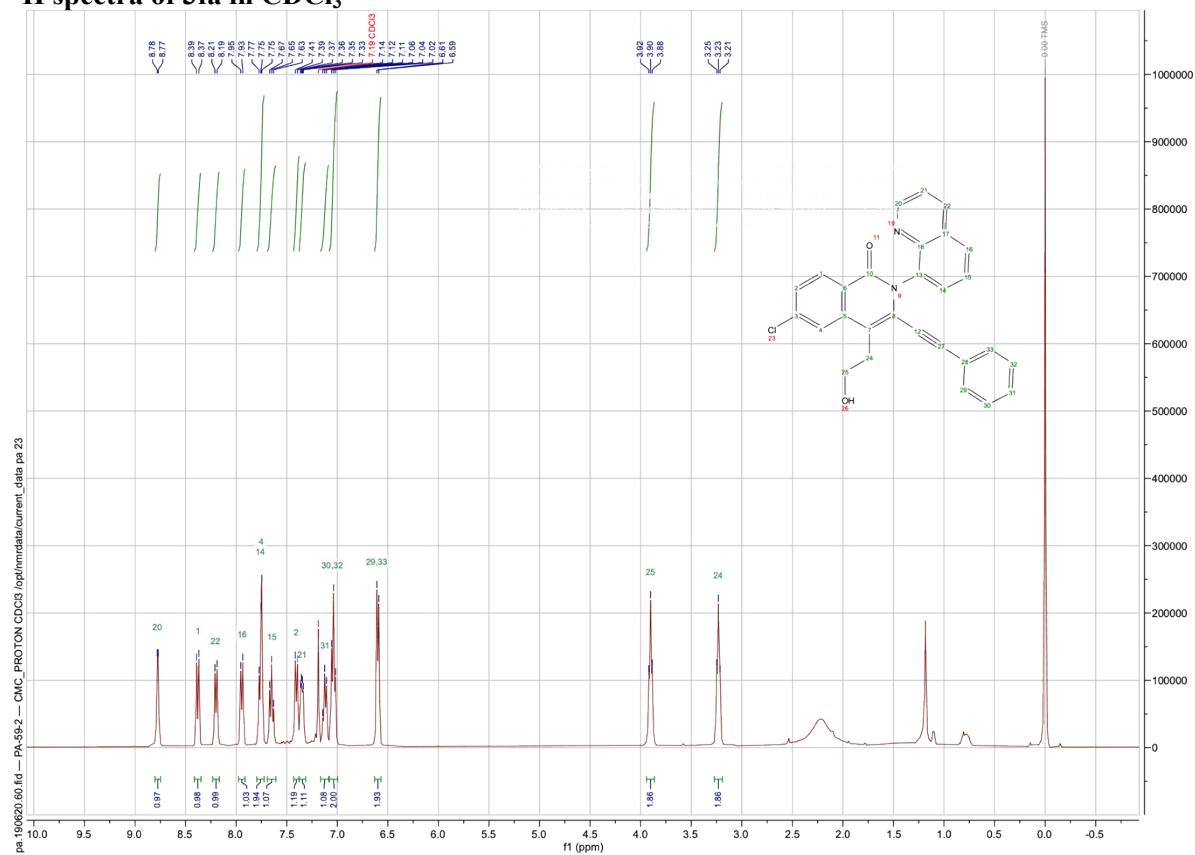

#### <sup>13</sup>C spectra of 3fa in CDCl<sub>3</sub>

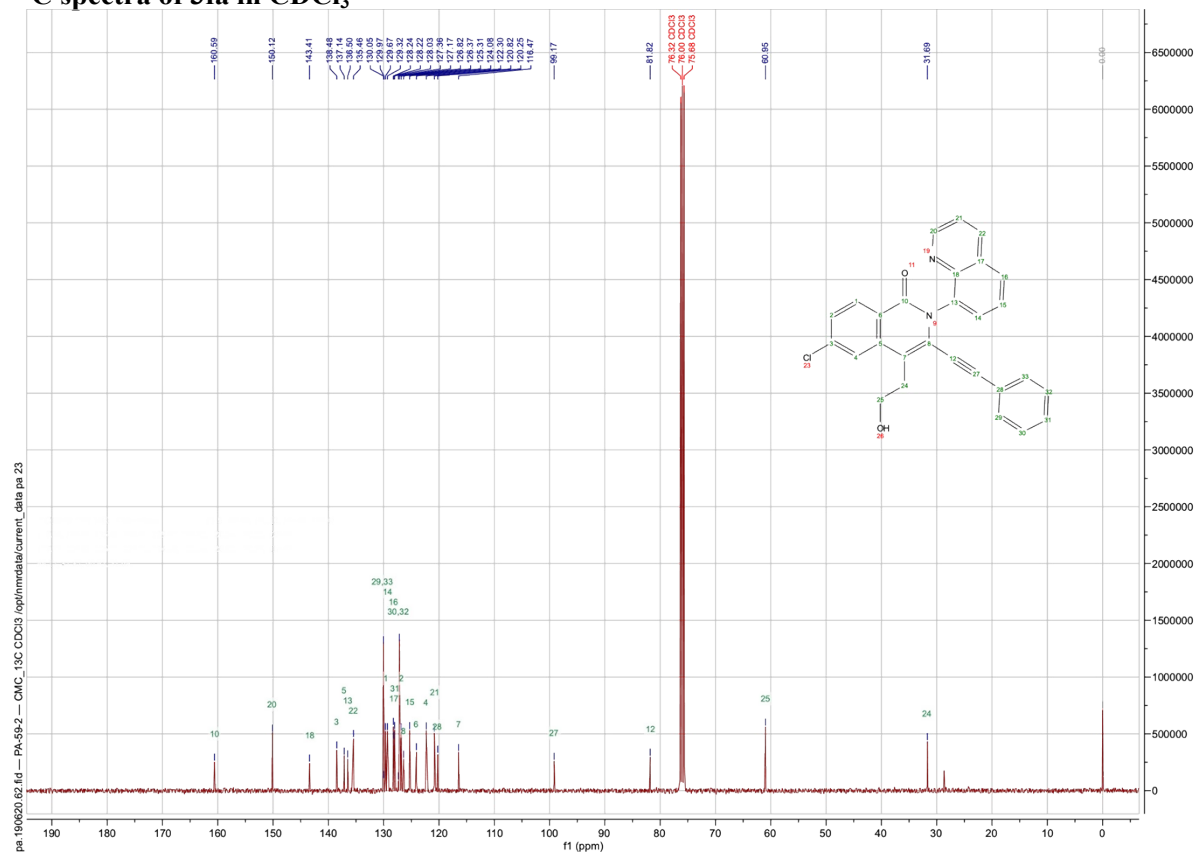



### HSQC spectra of 3fa in CDCl<sub>3</sub>

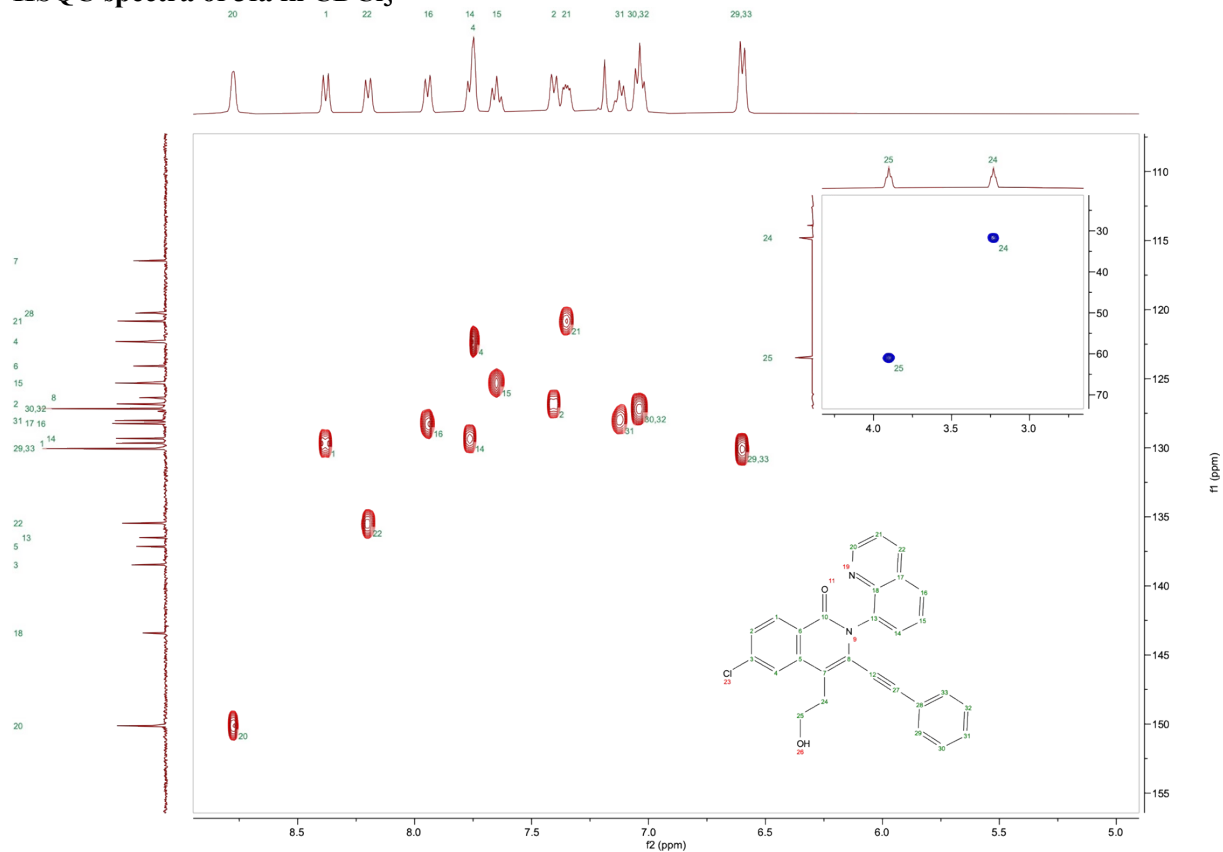

### HMBC spectra of 3fa in CDCl<sub>3</sub>

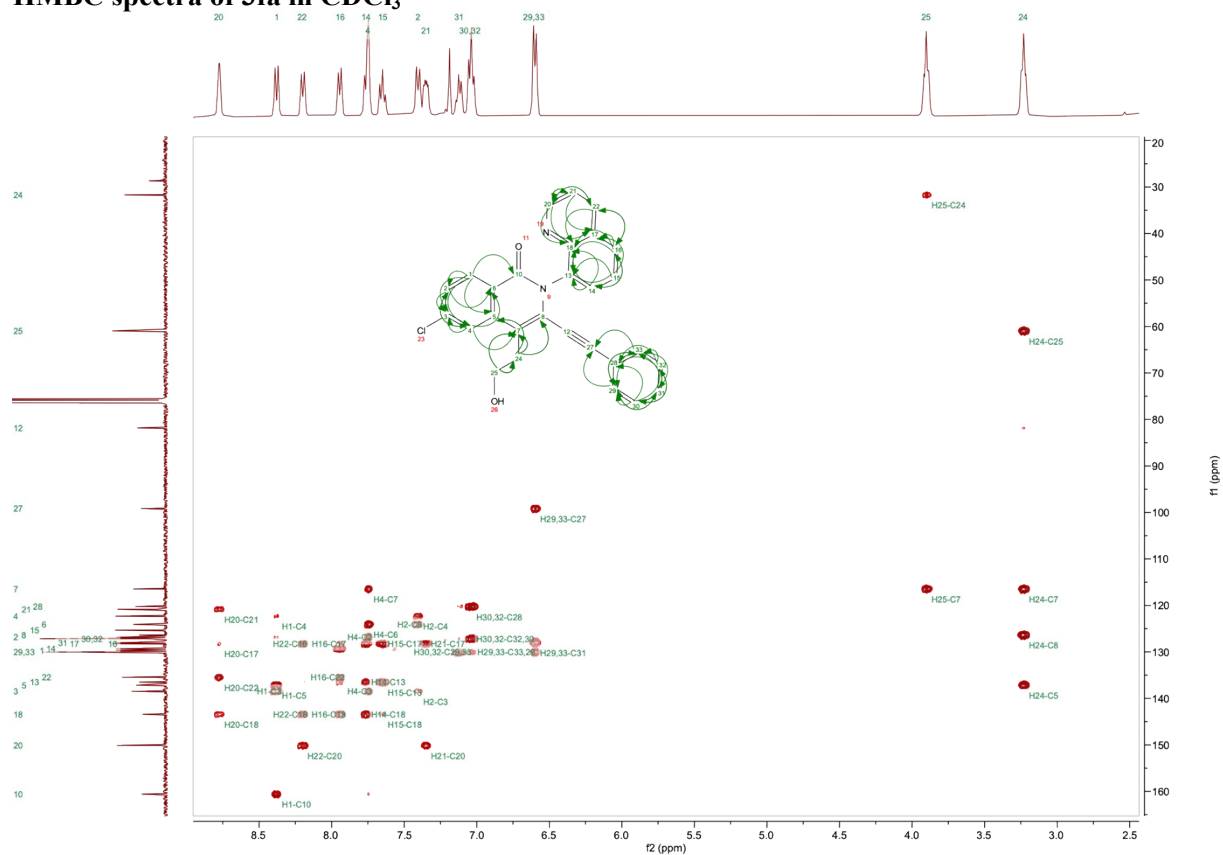

COSY spectra of 3fa in CDCl<sub>3</sub>

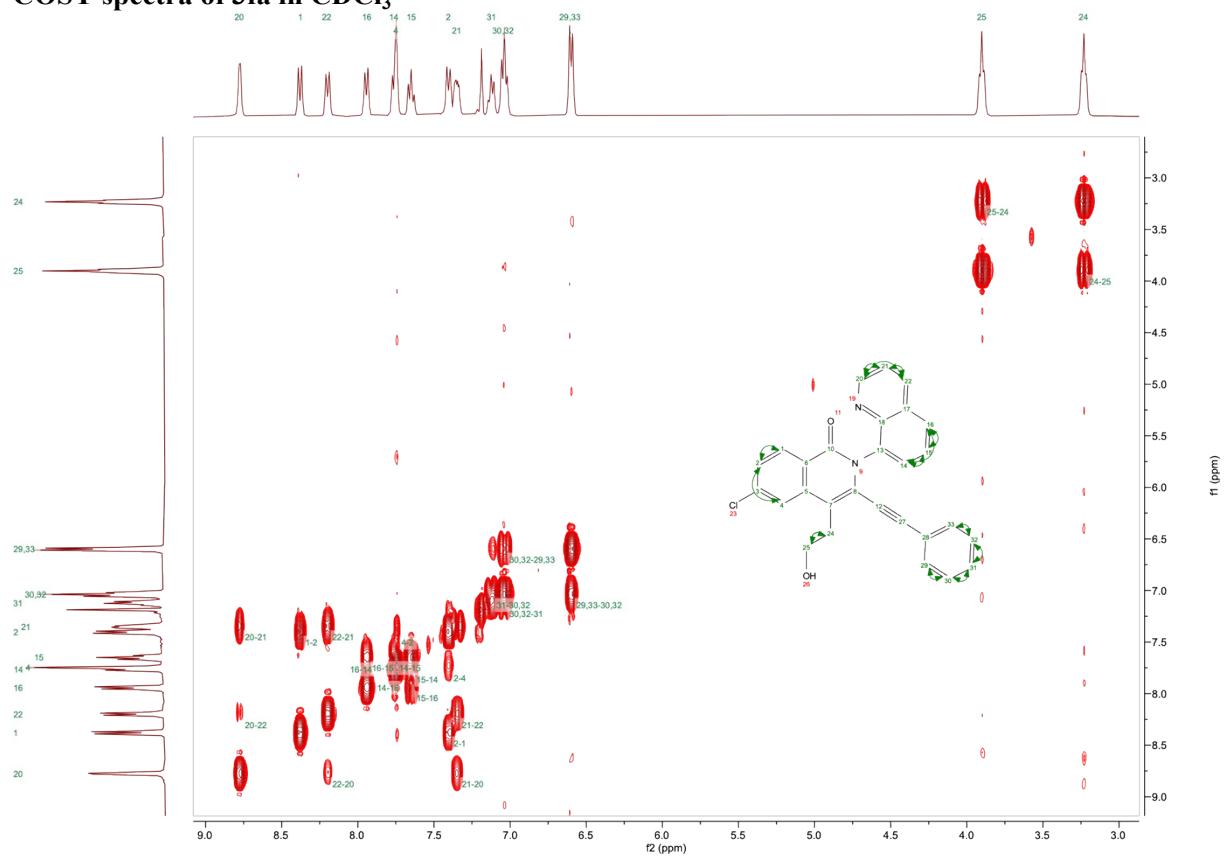

## HRMS spectra of 3fa

### HRMS DST-FIST Funded, Department of Chemistry, IIT Madras

#### ESI Mass Report

|                       |                      |                           |                                                     |
|-----------------------|----------------------|---------------------------|-----------------------------------------------------|
| <b>Name</b>           | 011119-2-KRR-PA-59-2 | <b>Data File Path</b>     | D:\MassHunter\Data\2019\NOV-2019\KRR\KRR-PA-59-2.d  |
| <b>Sample ID</b>      |                      | <b>Acq. Time (Local)</b>  | 01-11-2019 09:28:03 (UTC+05:30)                     |
| <b>Instrument</b>     | Instrument 1         | <b>Method Path (Acq)</b>  | D:\MassHunter\Methods\Direct Infusion_HPLC.m        |
| <b>MS Type</b>        | QTOF                 | <b>Version (Acq SW)</b>   | 6200 series TOF/6500 series Q-TOF B.08.00 (B8058.0) |
| <b>Inj. Vol. (ul)</b> | 5                    | <b>IRM Status</b>         | Success                                             |
| <b>Position</b>       | P2-D2                | <b>Method Path (DA)</b>   | D:\MassHunter\Methods\10.0\IIT-Target Screening_1.m |
| <b>Plate Pos.</b>     |                      | <b>Target Source Path</b> |                                                     |
| <b>Operator</b>       |                      | <b>Result Summary</b>     | 1 qualified (1 targets)                             |

#### Compound Details

**Cpd. 1: C<sub>28</sub>H<sub>19</sub>ClN<sub>2</sub>O<sub>2</sub>**

*Compound Spectra (overlaid)*

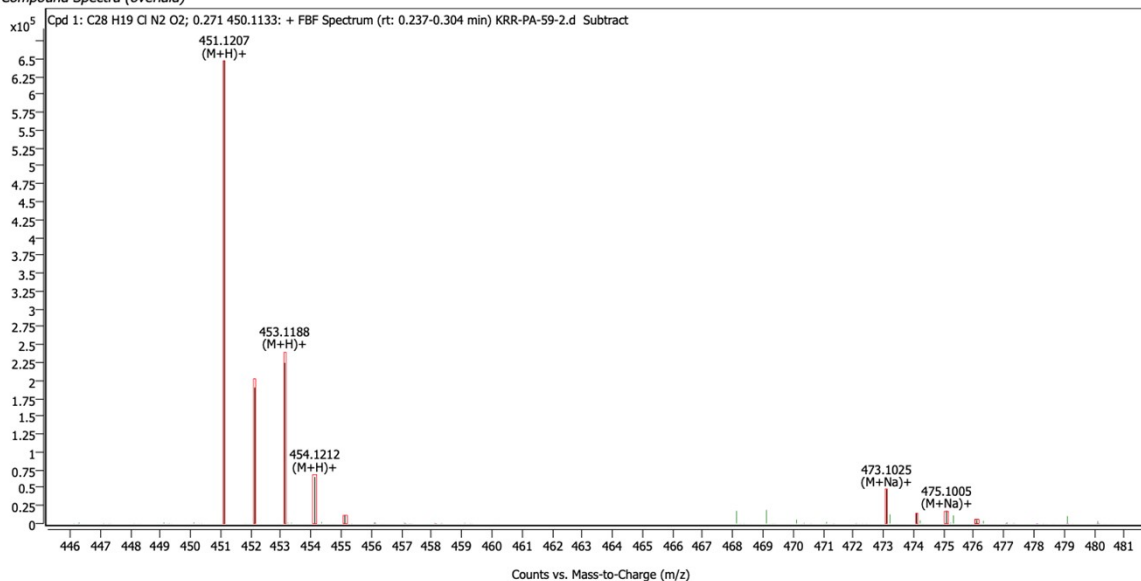

*Compound ID Table*

| Cpd | Formula                                                         | Mass (Tgt) | Calc. Mass | Mass     | Species             | Diff(Tgt.ppm) | mDa   |
|-----|-----------------------------------------------------------------|------------|------------|----------|---------------------|---------------|-------|
| 1   | C <sub>28</sub> H <sub>19</sub> ClN <sub>2</sub> O <sub>2</sub> | 450.1135   | 450.1133   | 451.1207 | (M+H) <sup>+</sup>  | -0.45         | -0.20 |
|     |                                                                 |            |            | 473.1025 | (M+Na) <sup>+</sup> |               |       |



### HSQC spectra of 3ga in MeOD

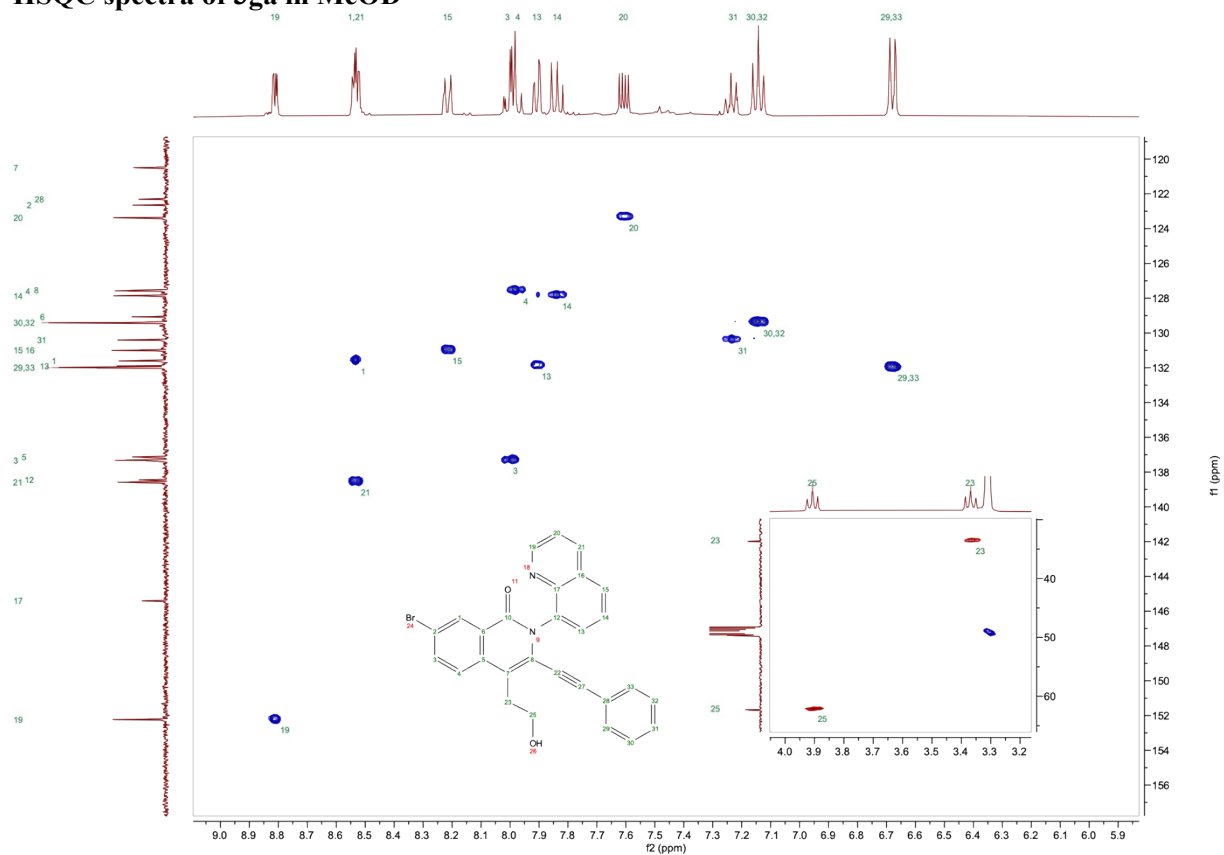

### HMBC spectra of 3ga in MeOD

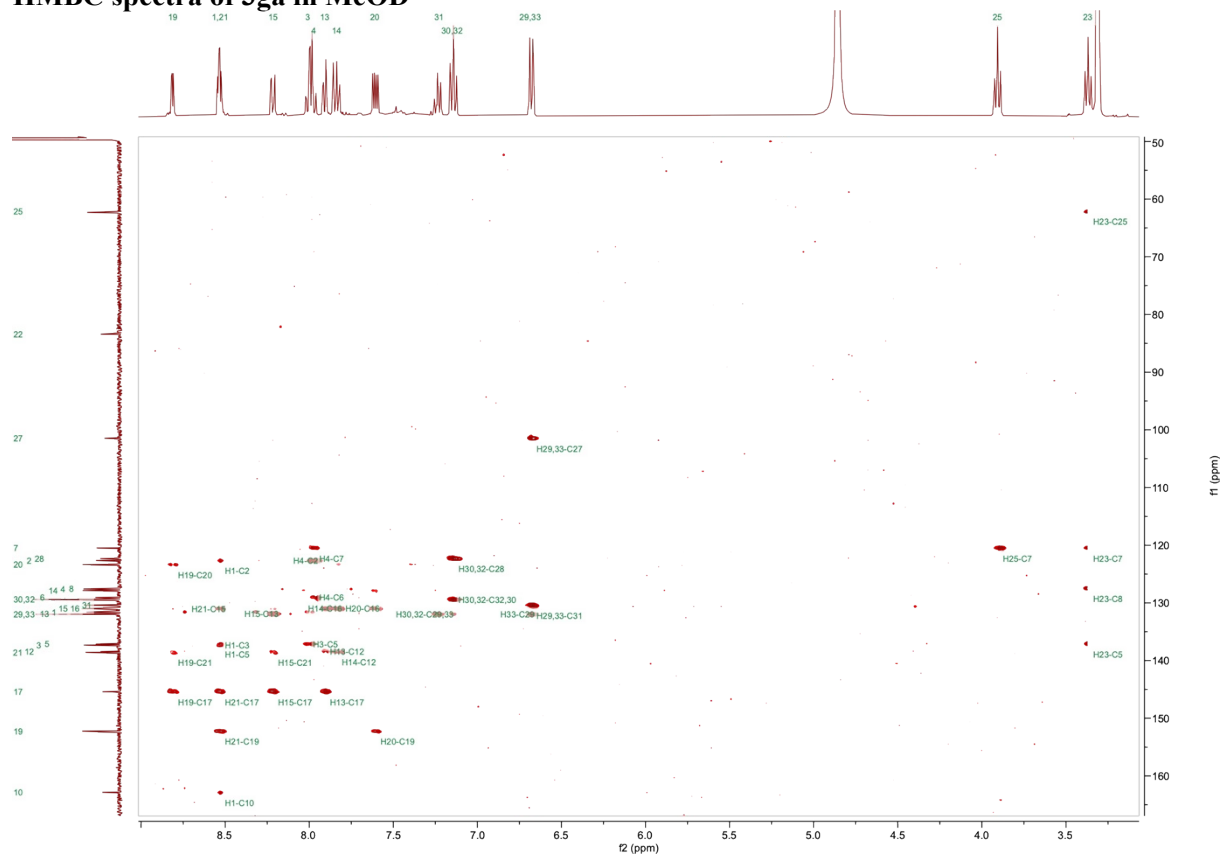



### HRMS spectra of 3ga

MEOH (2% H<sub>2</sub>O, 0.1% FA), CV35

210318\_HRMS\_IN\_KS\_S2-C-H-3 79 (1.353)AM2 (Ar,22500.0,556.28,0.00); Cm (1:117)

TOF MS ES+  
1.25e7

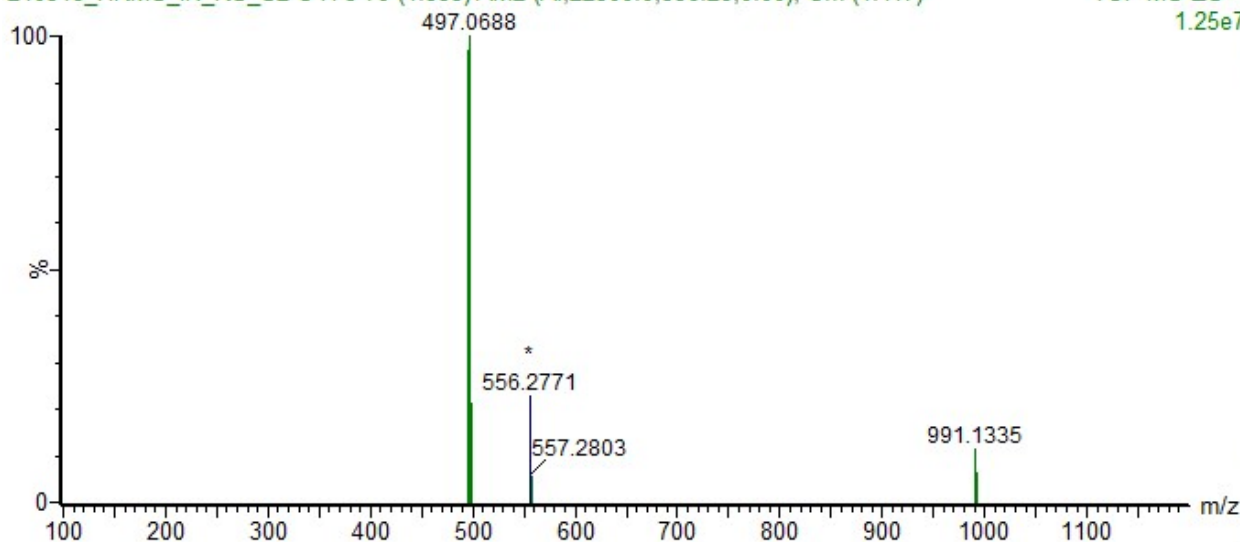

#### Single Mass Analysis

Tolerance = 2.0 mDa / DBE: min = -0.5, max = 100.0

Element prediction: Off

Number of isotope peaks used for i-FIT = 3

Monoisotopic Mass, Even Electron Ions

353 formula(e) evaluated with 2 results within limits (all results (up to 1000) for each mass)

Elements Used:

C: 0-50      H: 1-100      N: 0-3      O: 0-3      Na: 0-1      Br: 0-1

| Mass     | Calc. Mass | mDa  | PPM  | DBE  | Formula                                                             | i. | Fit Conf % | C  | H  | N | O | Na | Br |
|----------|------------|------|------|------|---------------------------------------------------------------------|----|------------|----|----|---|---|----|----|
| 495.0703 | 495.0708   | -0.5 | -1.0 | 19.5 | C <sub>28</sub> H <sub>20</sub> N <sub>2</sub> O <sub>2</sub> Br    | 1  | 89.40      | 28 | 20 | 2 | 2 |    | 1  |
|          | 495.0684   | 1.9  | 3.8  | 16.5 | C <sub>26</sub> H <sub>21</sub> N <sub>2</sub> O <sub>2</sub> Na Br | 2  | 10.60      | 26 | 21 | 2 | 2 | 1  | 1  |

MEOH (2% H<sub>2</sub>O, 0.1% FA), CV35

210318\_HRMS\_IN\_KS\_S2-C-H-3 79 (1.353)AM2 (Ar,22500.0,556.28,0.00); Cm (1:117)

TOF MS ES+  
1.25e+007

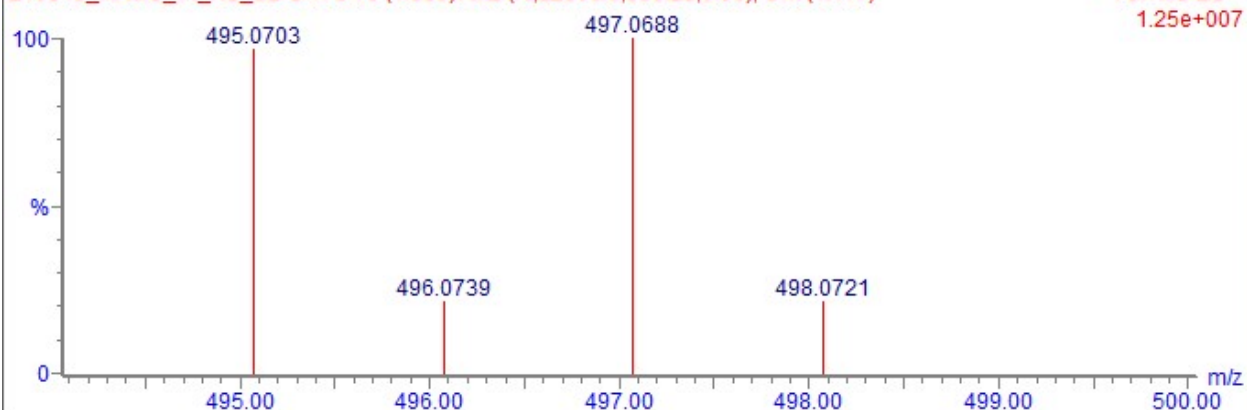





### HSQC spectra of 4ab in DMSO-*d*<sub>6</sub>

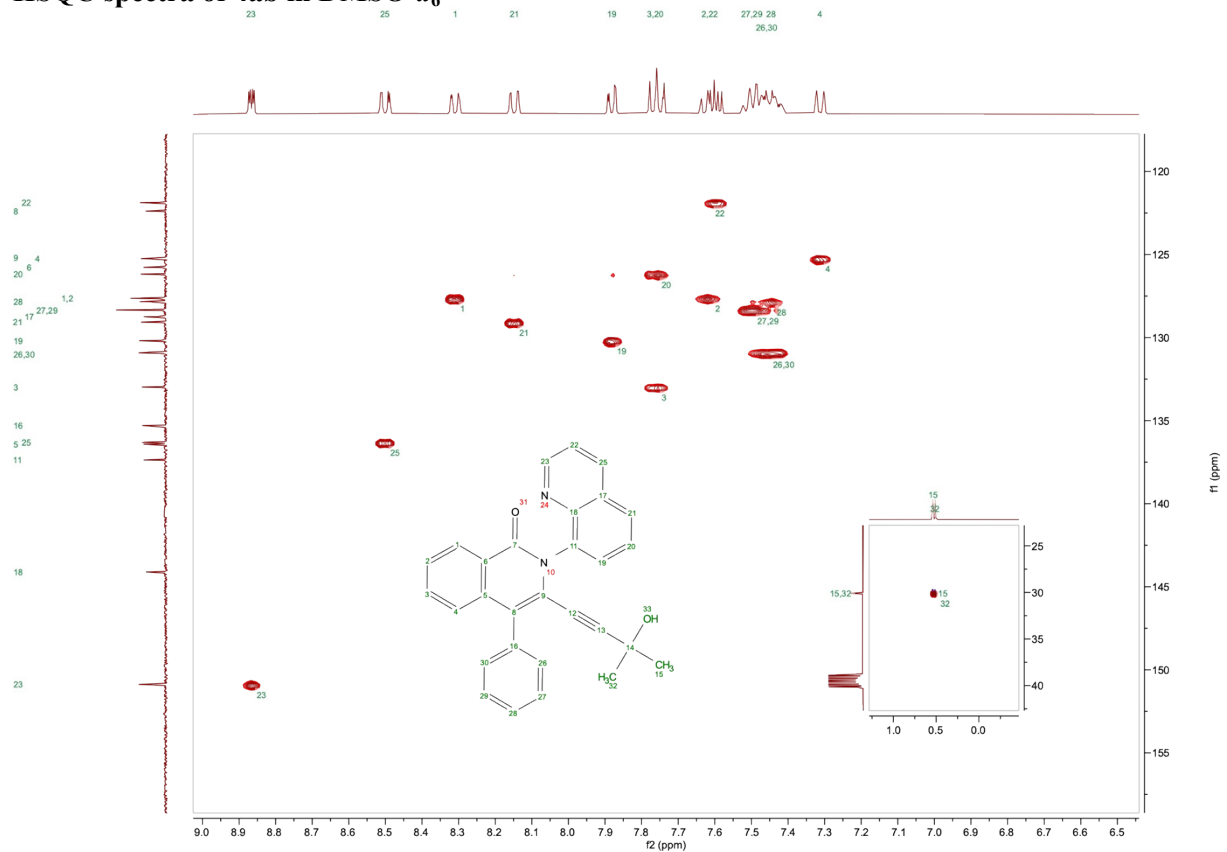

### HMBC spectra of 4ab in DMSO-*d*<sub>6</sub>

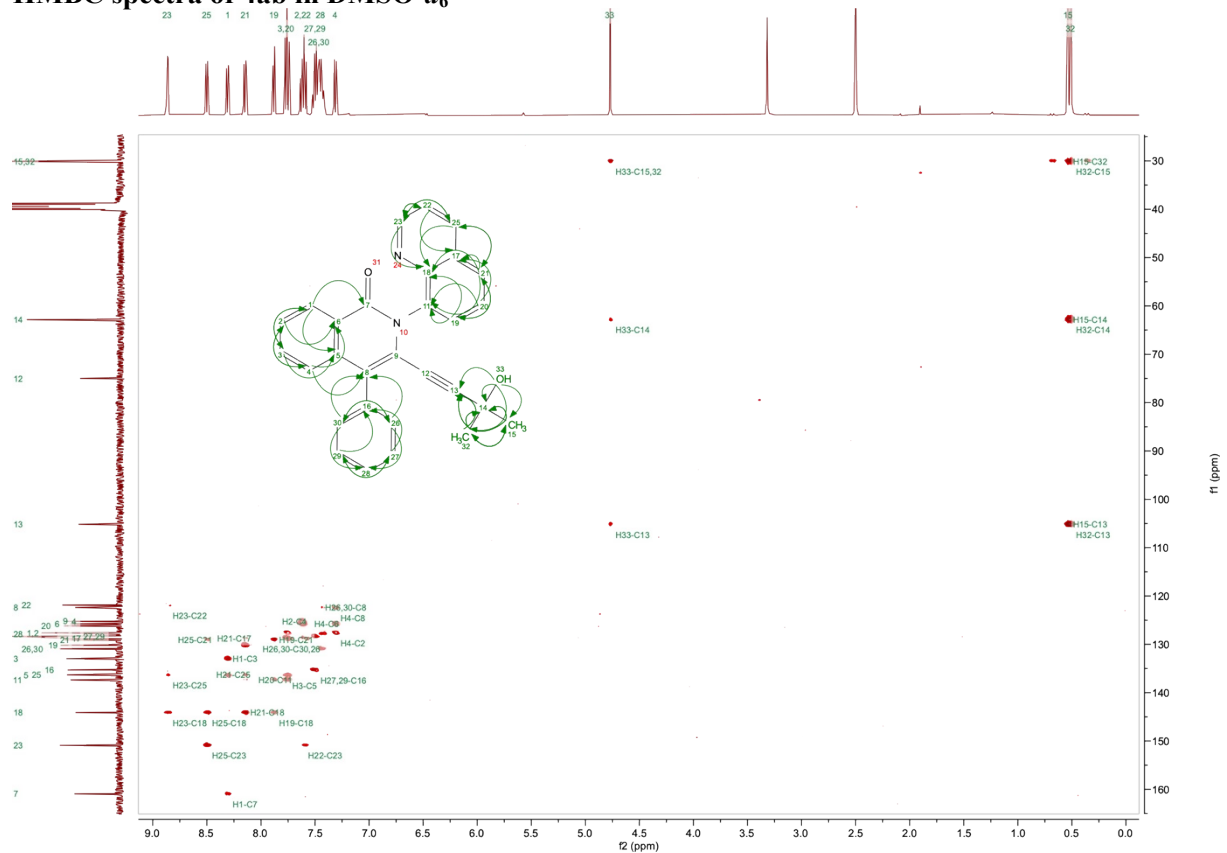

# COSY spectra of 4ab in DMSO-*d*<sub>6</sub>

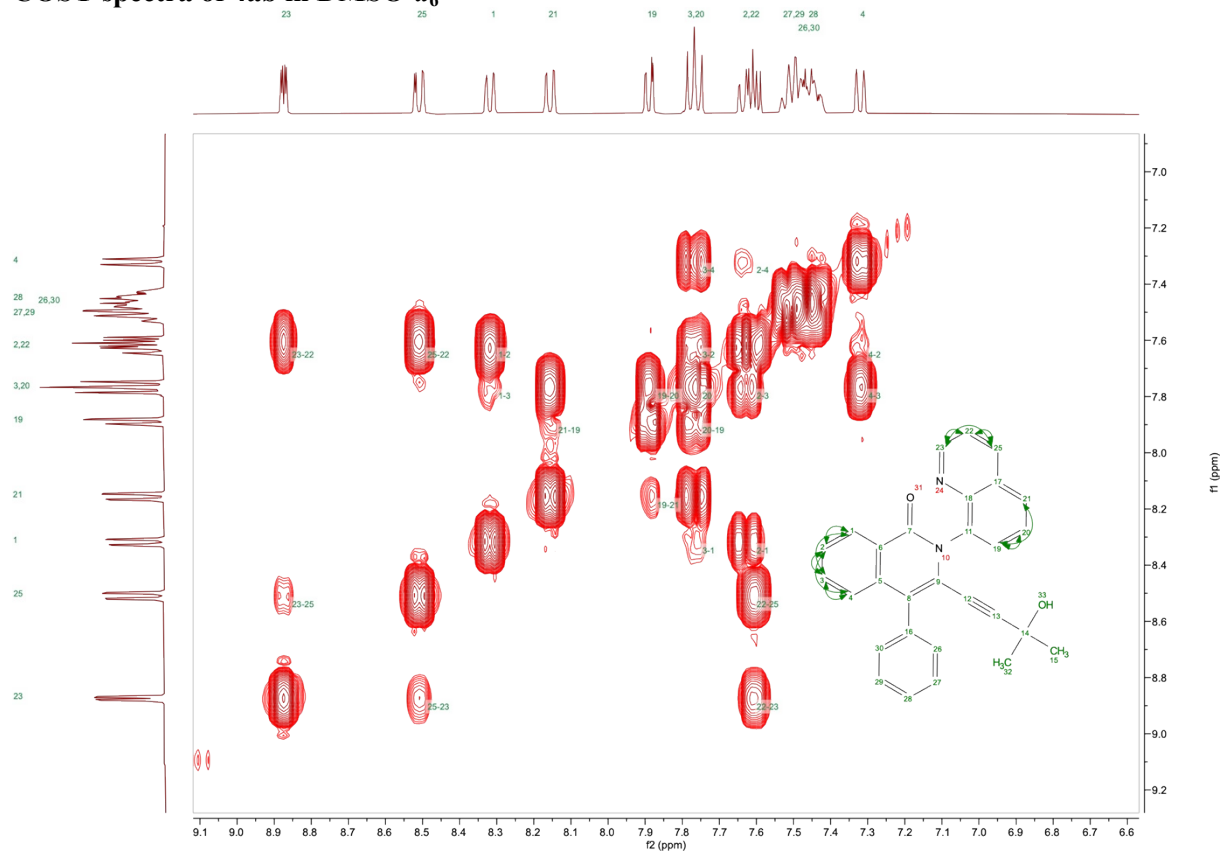

### HRMS spectra of 4ab

MEOH (2% H<sub>2</sub>O, 0.1% FA), CV35

210316\_HRMS\_IN\_KS\_C-H-1 10 (0.186) AM2 (Ar,22500.0,556.28,0.00); Cm (10:117)

TOF MS ES+  
1.64e7

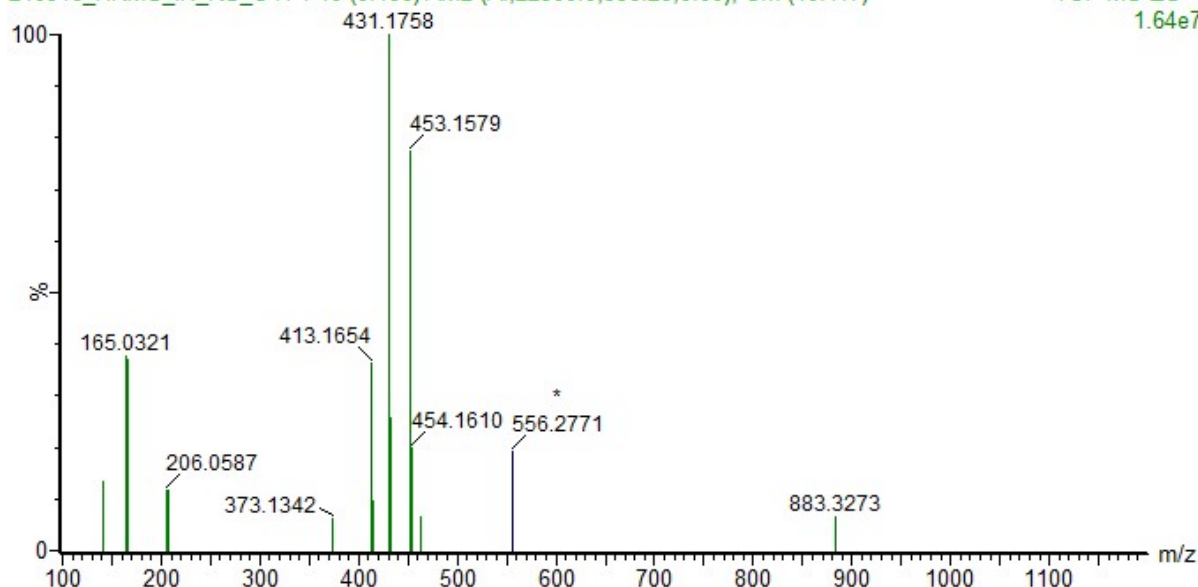

#### Single Mass Analysis

Tolerance = 2.0 mDa / DBE: min = -0.5, max = 100.0

Element prediction: Off

Number of isotope peaks used for i-FIT = 3

Monoisotopic Mass, Even Electron Ions

167 formula(e) evaluated with 2 results within limits (all results (up to 1000) for each mass)

Elements Used:

| Mass     | Calc. Mass | mDa  | PPM  | DBE  | Formula                                                       | Fit Conf % | C  | H  | N | O | Na |
|----------|------------|------|------|------|---------------------------------------------------------------|------------|----|----|---|---|----|
| 431.1758 | 431.1760   | -0.2 | -0.5 | 19.5 | C <sub>29</sub> H <sub>23</sub> N <sub>2</sub> O <sub>2</sub> | 40.90.32   | 29 | 23 | 2 | 2 |    |
|          | 431.1776   | -1.8 | -4.2 | 20.5 | C <sub>32</sub> H <sub>24</sub> Na                            | 529.68     | 32 | 24 |   |   | 1  |

MEOH (2% H<sub>2</sub>O, 0.1% FA), CV35

210316\_HRMS\_IN\_KS\_C-H-1 10 (0.186) AM2 (Ar,22500.0,556.28,0.00); Cm (10:117)

TOF MS ES+  
1.64e+007

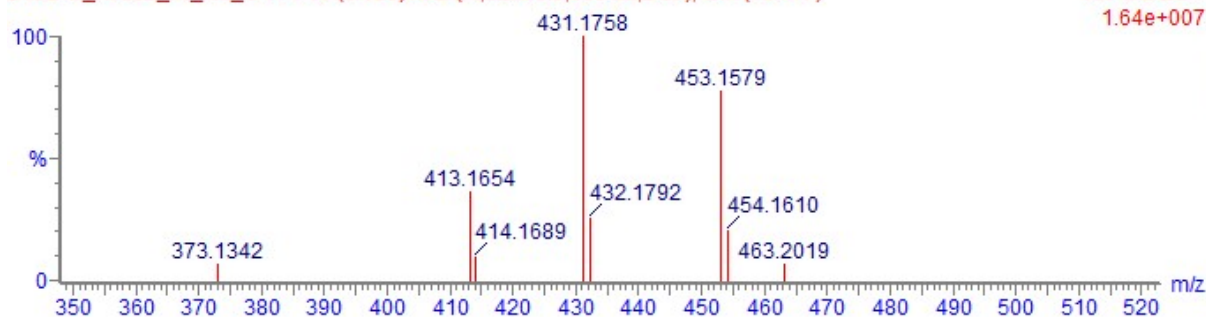

4bb

<sup>1</sup>H spectra of 4bb in MeOD

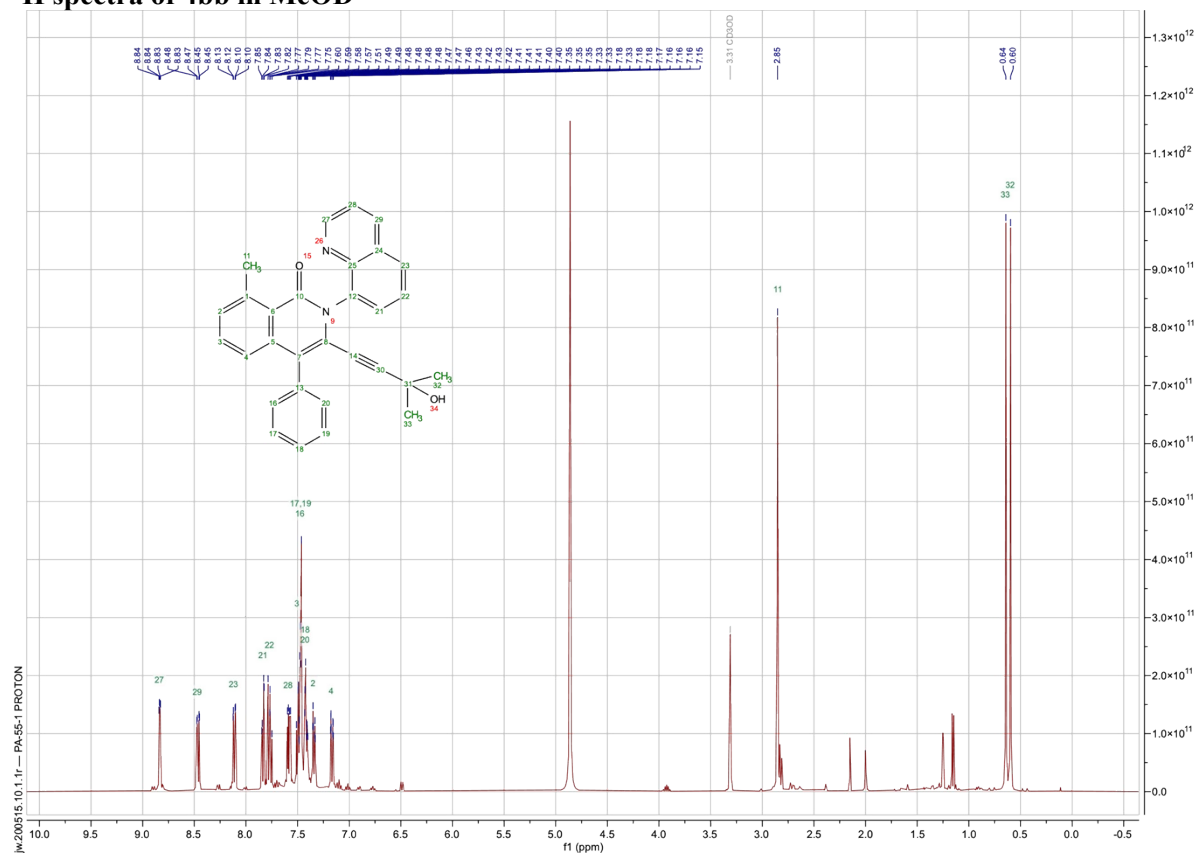

<sup>13</sup>C spectra of 4bb in MeOD

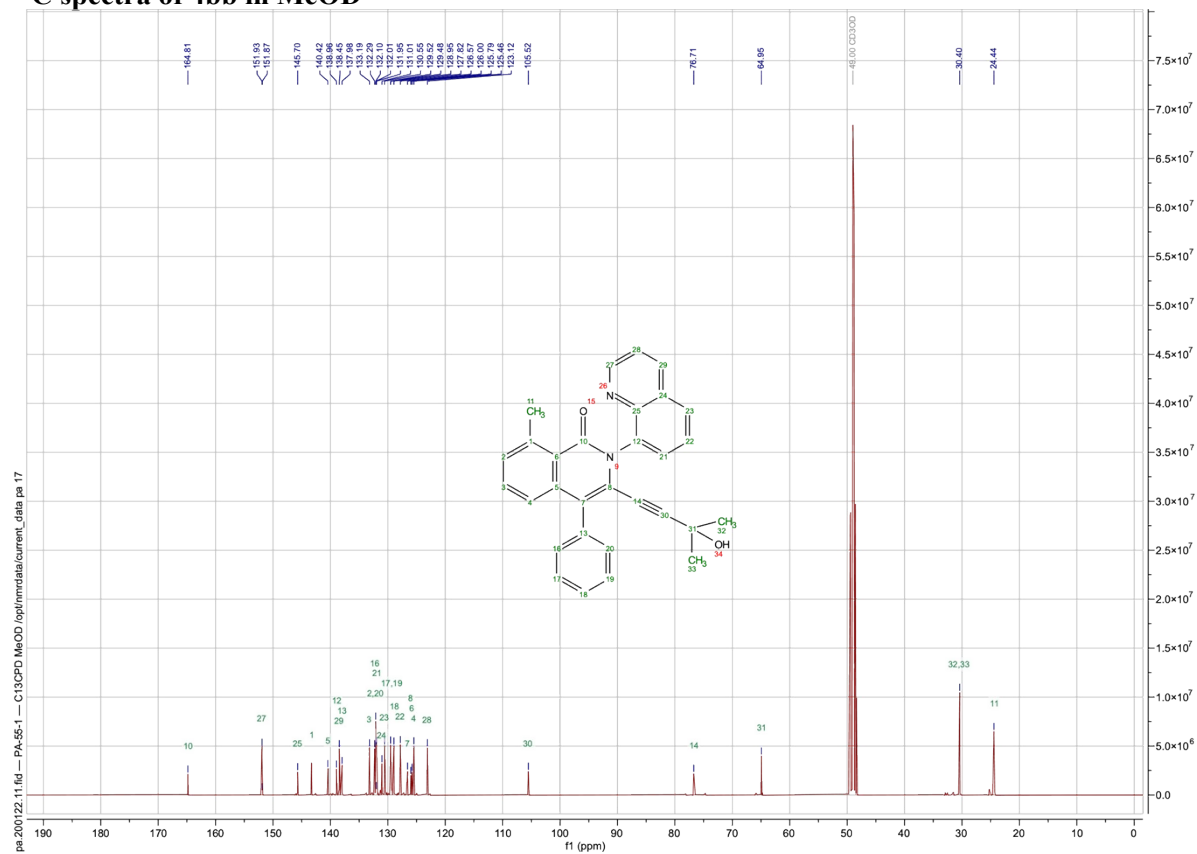

## HSQC spectra of 4bb in MeOD

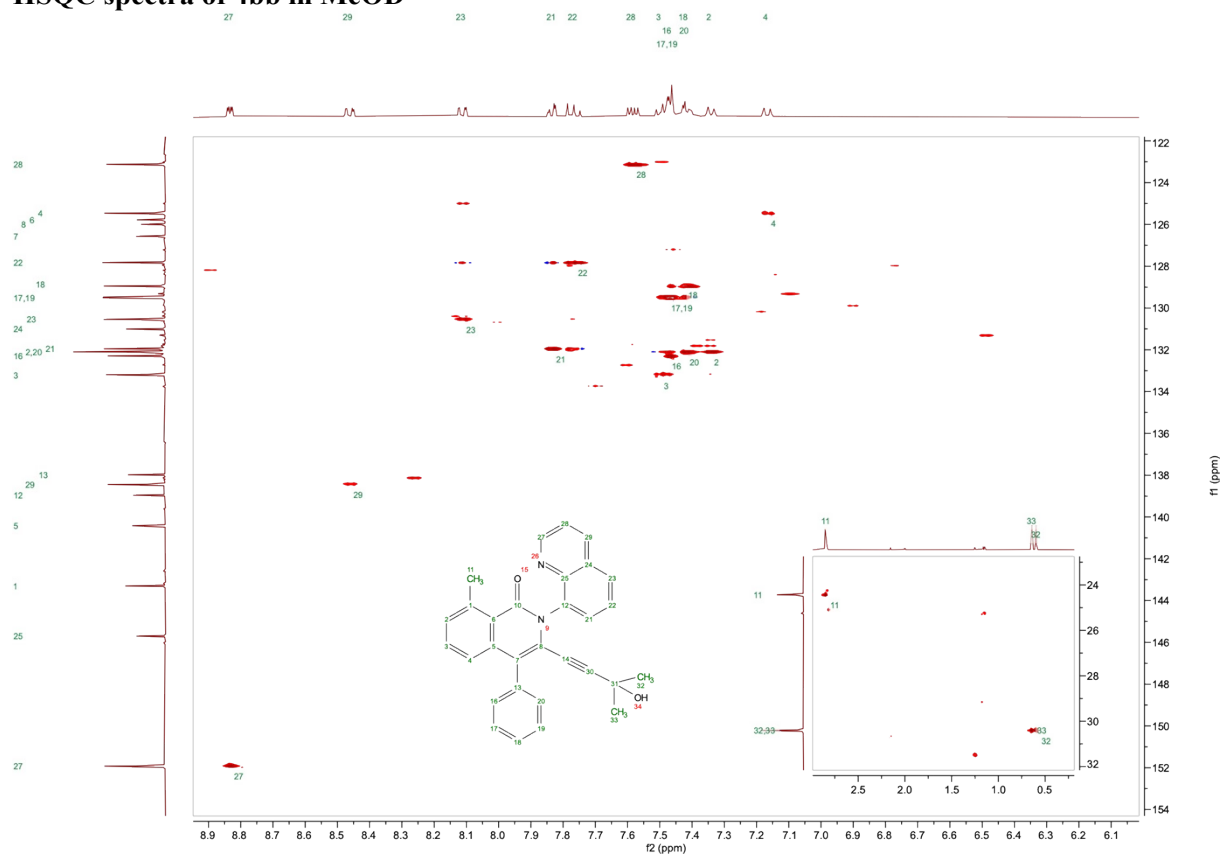

## HMBC spectra of 4bb in MeOD

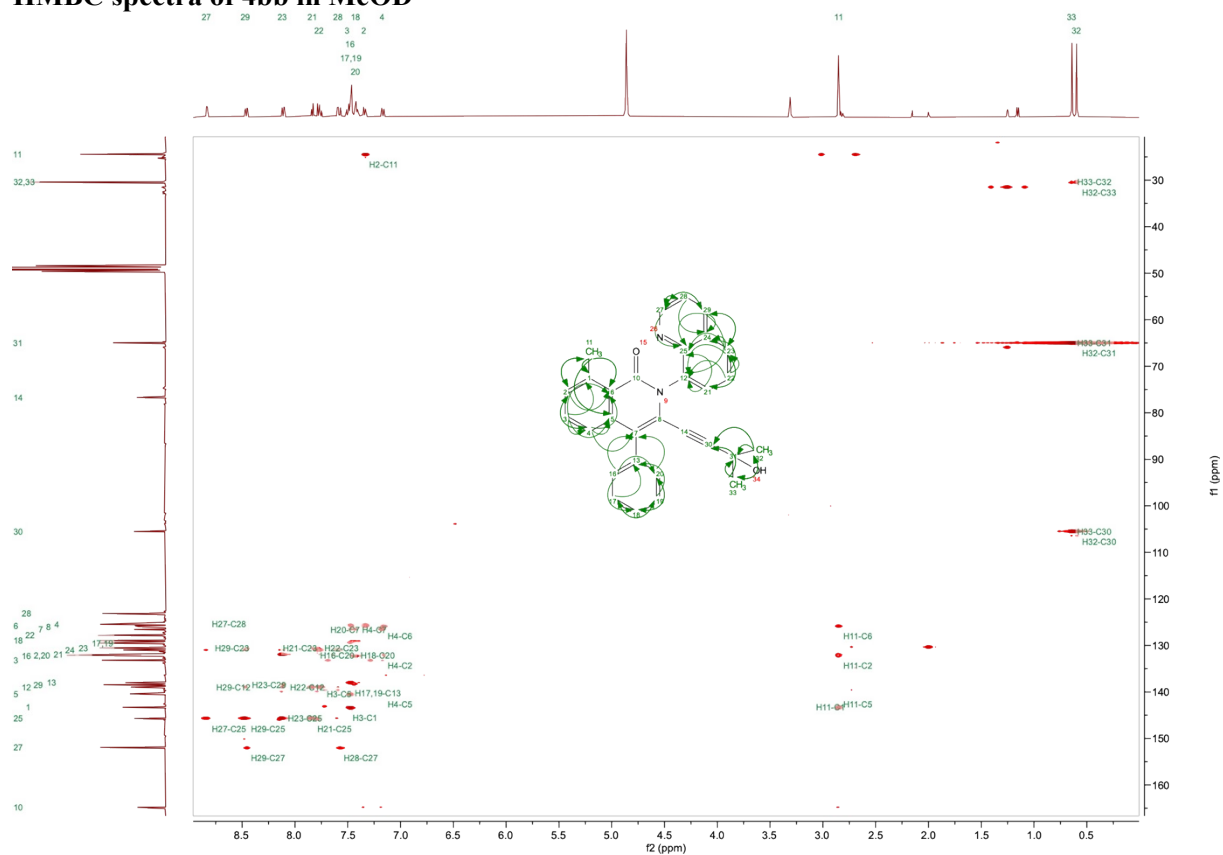

### HRMS spectra of 4bb

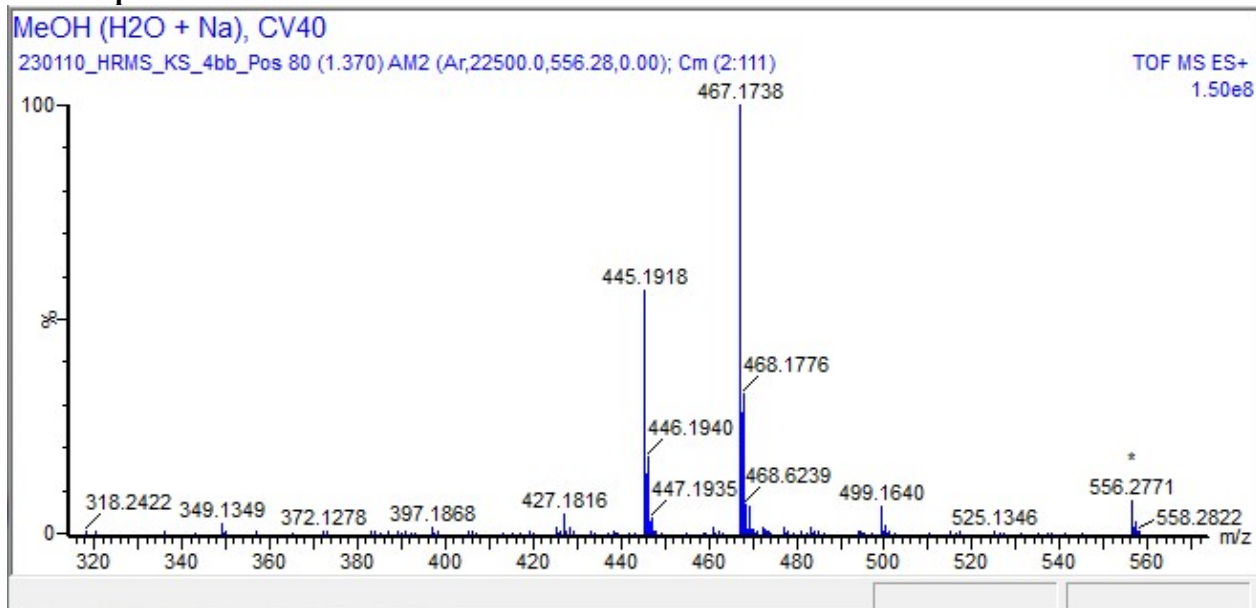

#### Single Mass Analysis

Tolerance = 2.0 mDa / DBE: min = -1.5, max = 100.0

Element prediction: Off

Number of isotope peaks used for i-FIT = 2

Monoisotopic Mass, Even Electron Ions

108 formula(e) evaluated with 1 results within limits (all results (up to 1000) for each mass)

Elements Used:

C: 1-40

H: 1-40

N: 1-4

O: 1-4

Na: 0-1

| Mass     | Calc. Mass | mDa | PPM | DBE  | Formula                                                       | i | Fit Conf % | C  | H  | N | O | Na |
|----------|------------|-----|-----|------|---------------------------------------------------------------|---|------------|----|----|---|---|----|
| 445.1918 | 445.1916   | 0.2 | 0.4 | 19.5 | C <sub>30</sub> H <sub>25</sub> N <sub>2</sub> O <sub>2</sub> | 3 | n..n/a     | 30 | 25 | 2 | 2 |    |

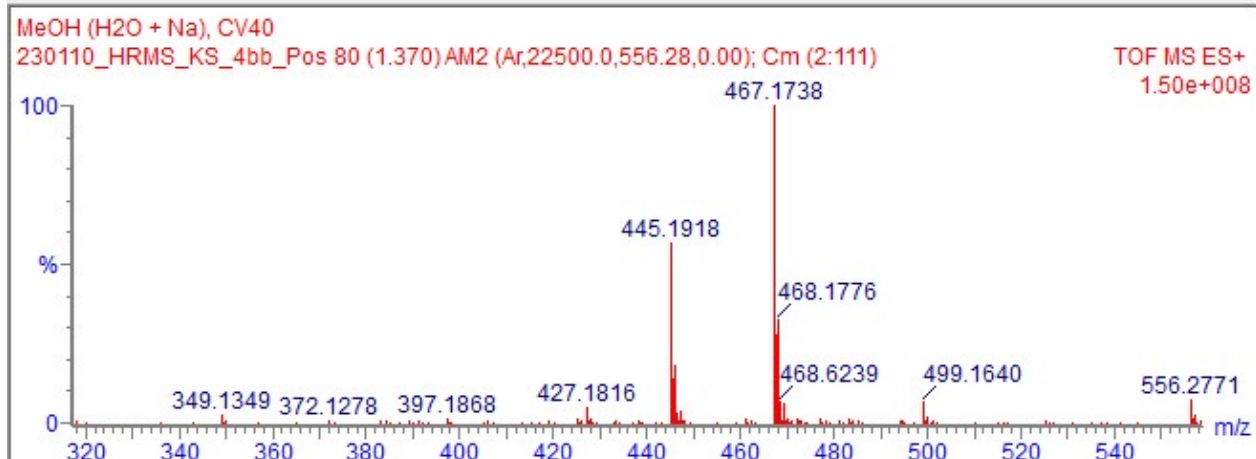



### HSQC <sup>1</sup>H spectra of 4cb in MeOD

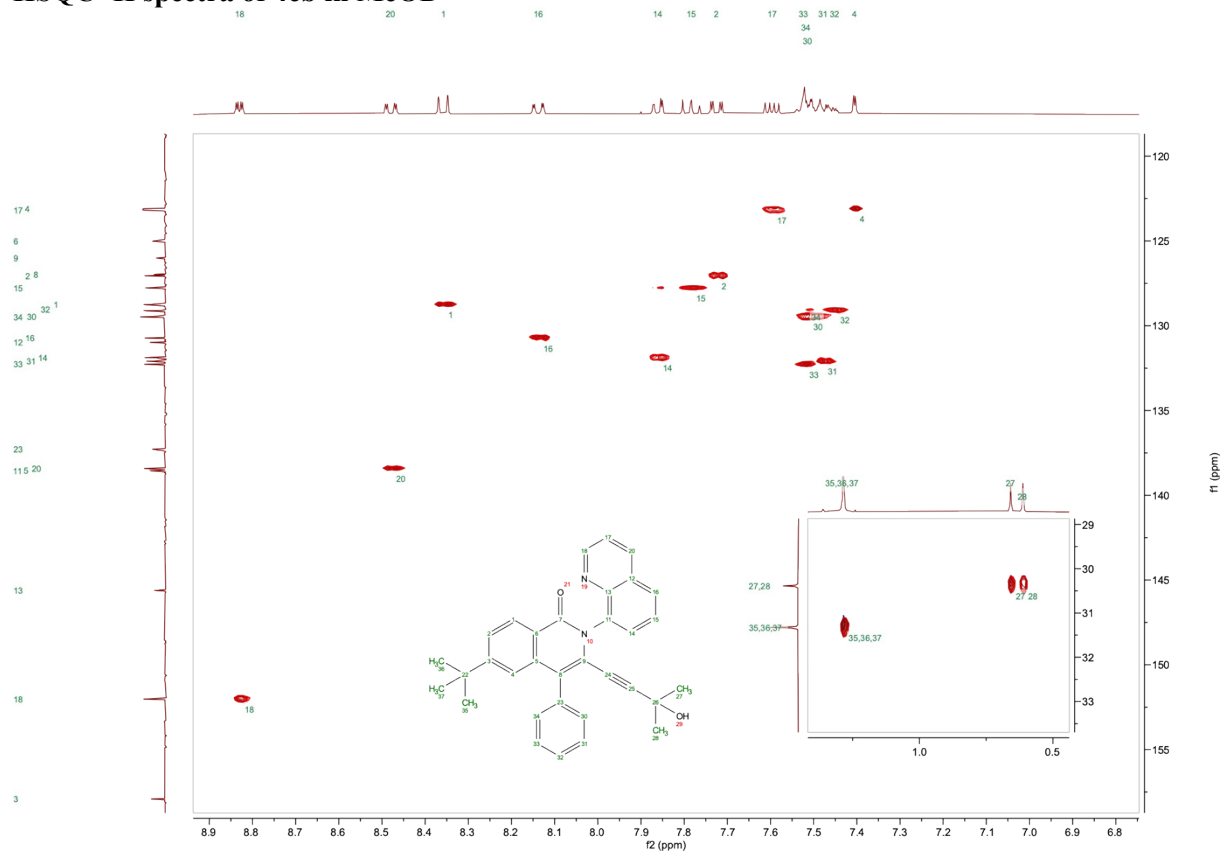

### HMBC <sup>1</sup>H spectra of 4cb in MeOD

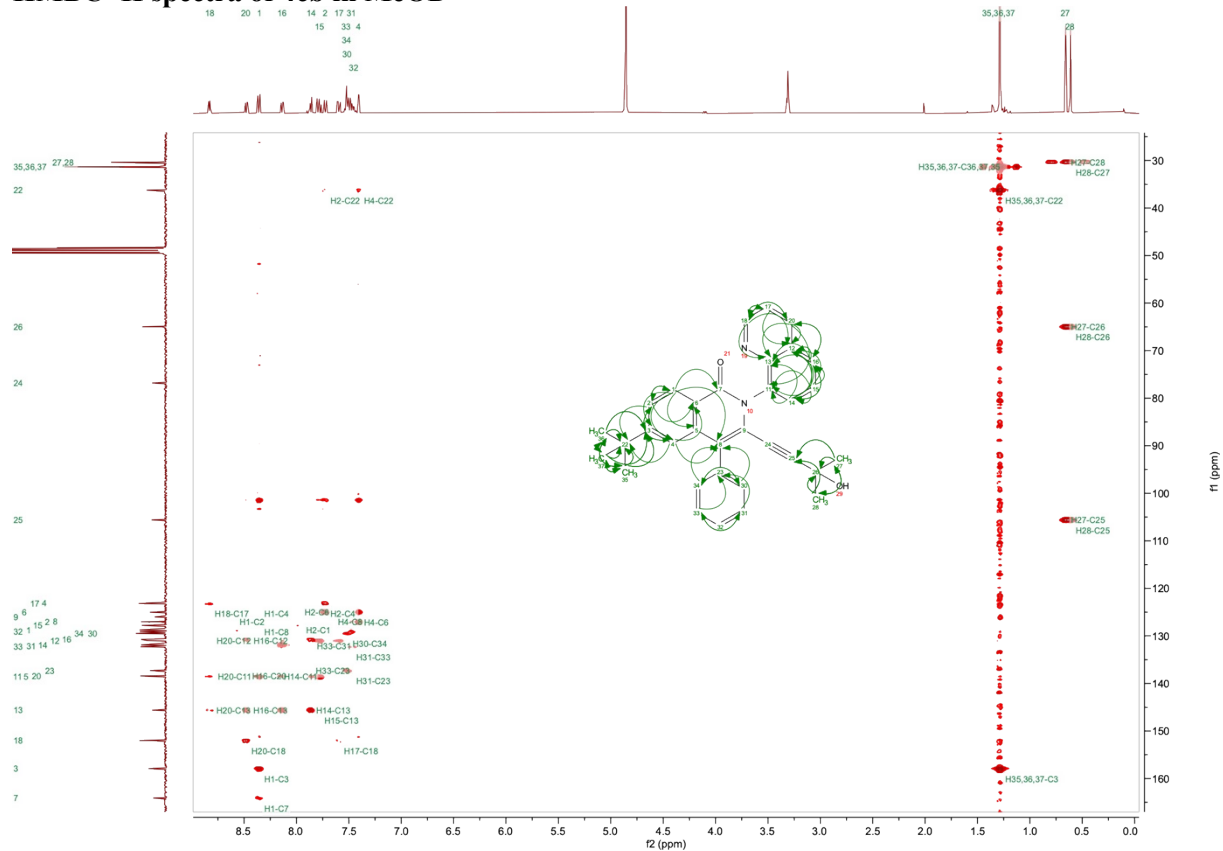



# COSY <sup>1</sup>H spectra of 4cb in MeOD

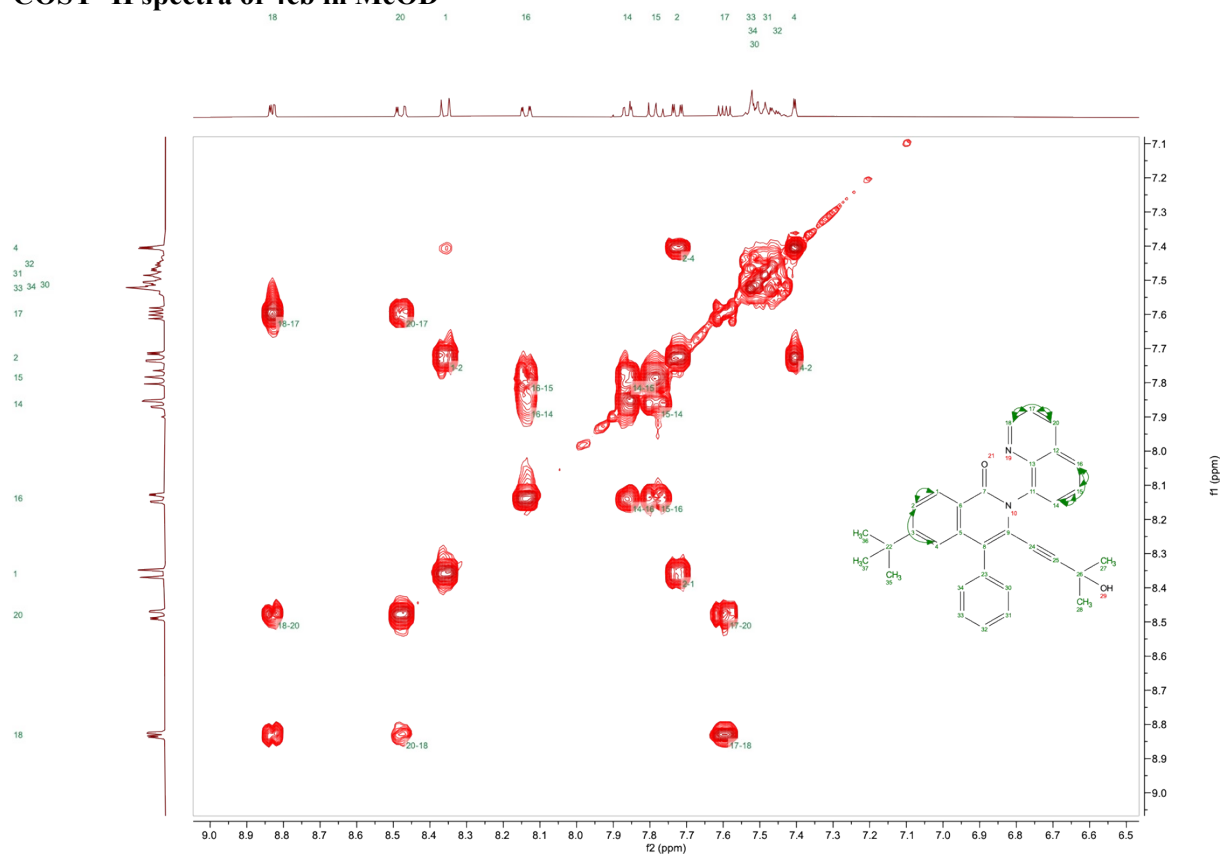

### HRMS <sup>1</sup>H spectra of 4cb

MeOH (H<sub>2</sub>O + Na), CV40

230110\_HRMS\_KS\_4cb\_Pos 81 (1.386)AM2 (Ar,22500.0,556.28,0.00); Cm (2:111)

TOF MS ES+  
3.02e7

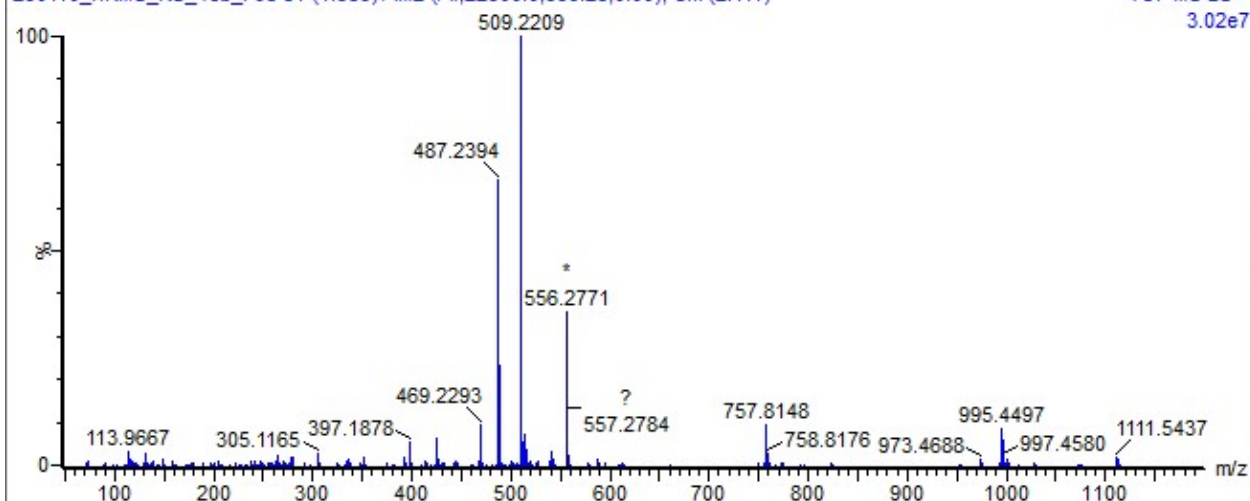

### Single Mass Analysis

Tolerance = 2.0 mDa / DBE: min = -1.5, max = 100.0

Element prediction: Off

Number of isotope peaks used for i-FIT = 2

Monoisotopic Mass, Even Electron Ions

106 formula(e) evaluated with 1 results within limits (all results (up to 1000) for each mass)

Elements Used:

C: 1-40      H: 1-40      N: 1-4      O: 1-4      Na: 0-1

| Mass     | Calc. Mass | mDa | PPM | DBE  | Formula       | i, i...      | Fit Conf % | C  | H  | N | O | Na |
|----------|------------|-----|-----|------|---------------|--------------|------------|----|----|---|---|----|
| 487.2394 | 487.2386   | 0.8 | 1.6 | 19.5 | C33 H31 N2 O2 | 3...n... n/a |            | 33 | 31 | 2 | 2 |    |

MeOH (H<sub>2</sub>O + Na), CV40

230110\_HRMS\_KS\_4cb\_Pos 81 (1.386)AM2 (Ar,22500.0,556.28,0.00); Cm (2:111)

TOF MS ES+  
2.00e+007

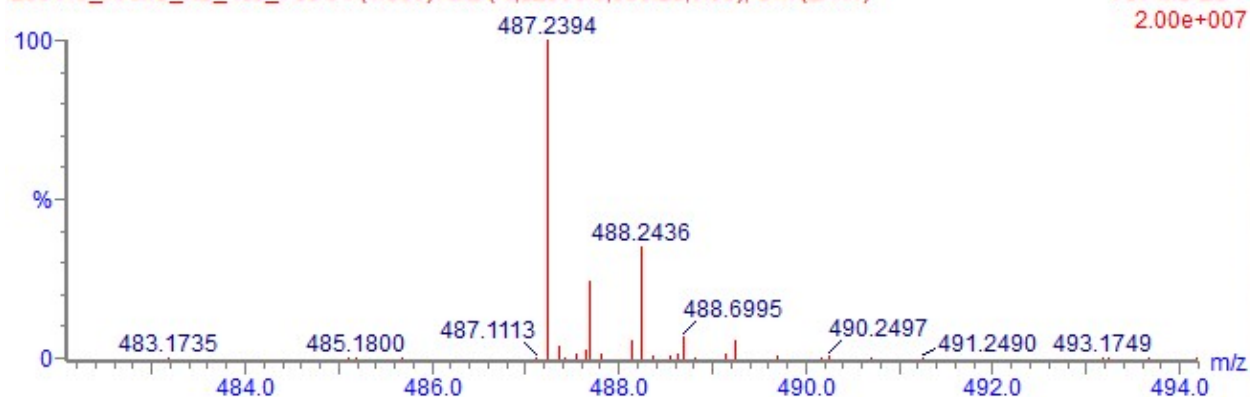

4db

### <sup>1</sup>H spectra of 4db in MeOD

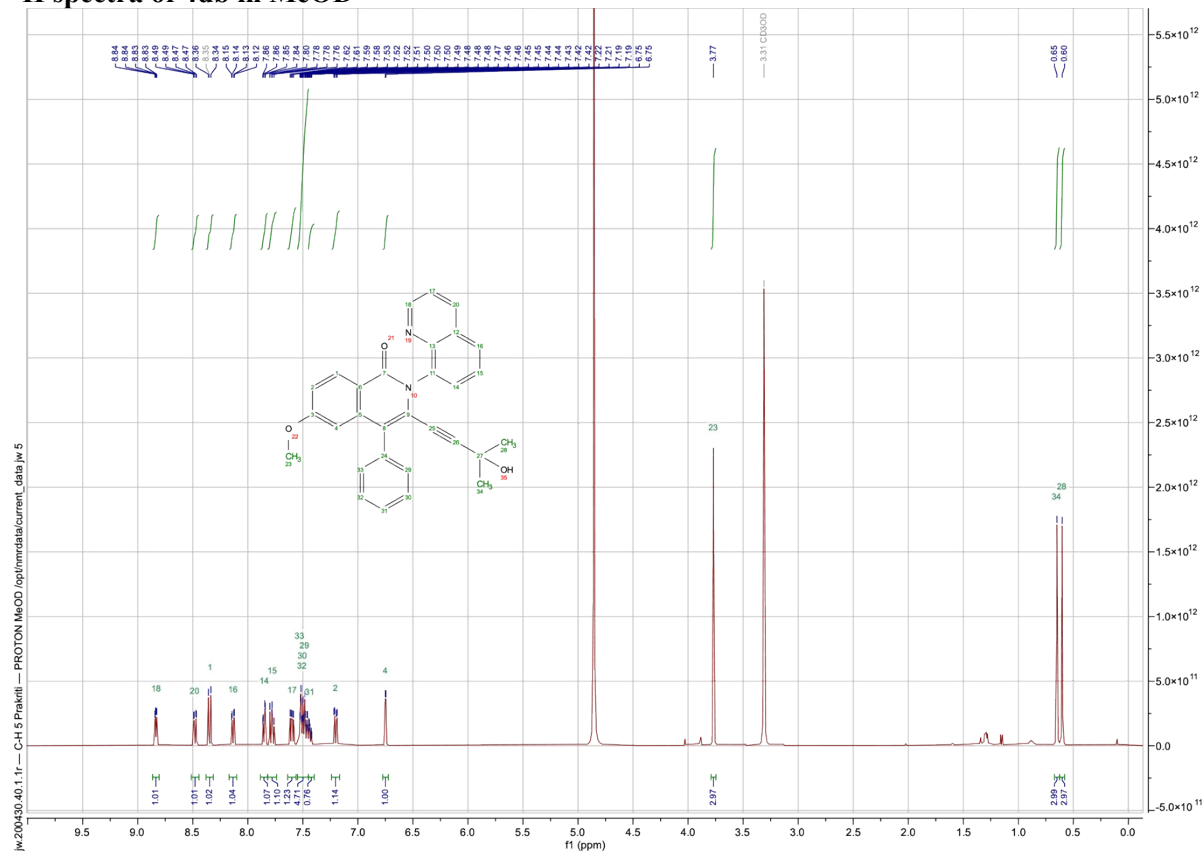

### <sup>13</sup>C spectra of 4db in MeOD

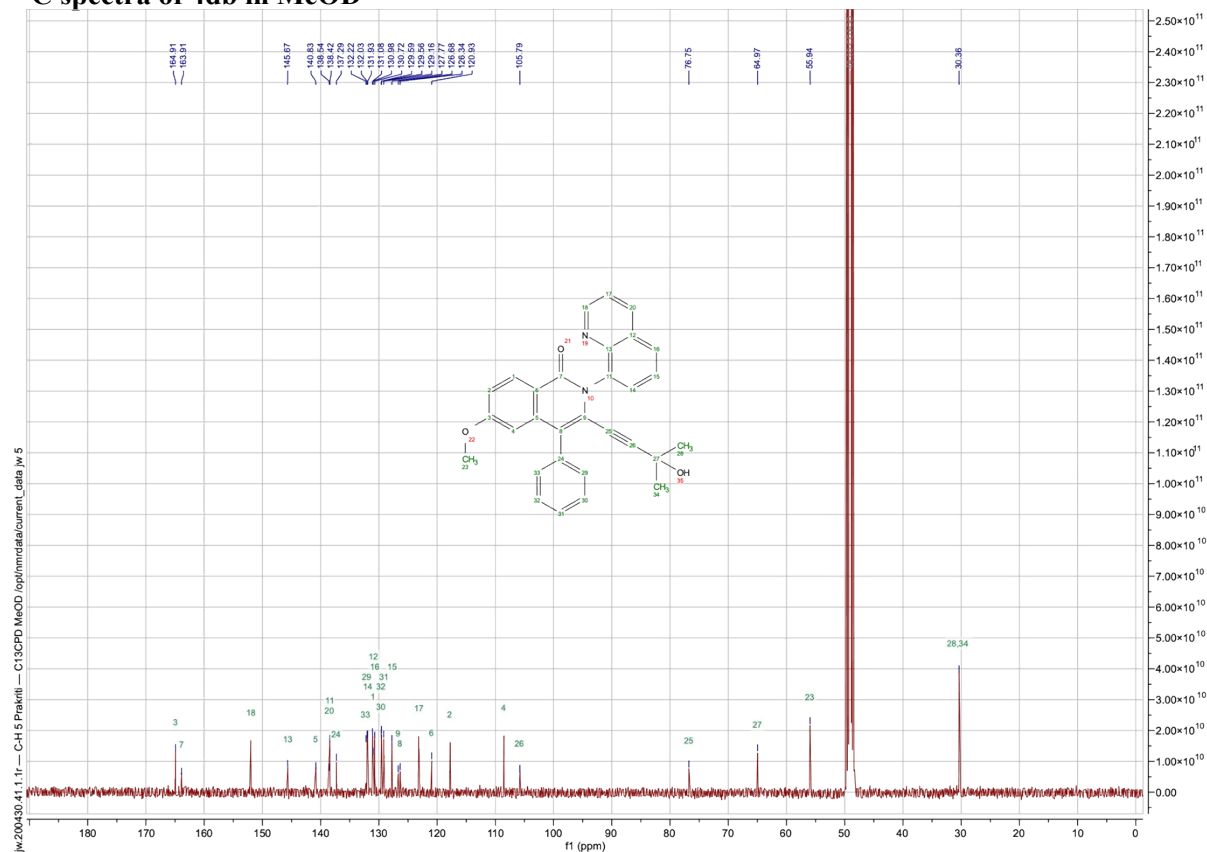

## HSQC spectra of 4db in MeOD

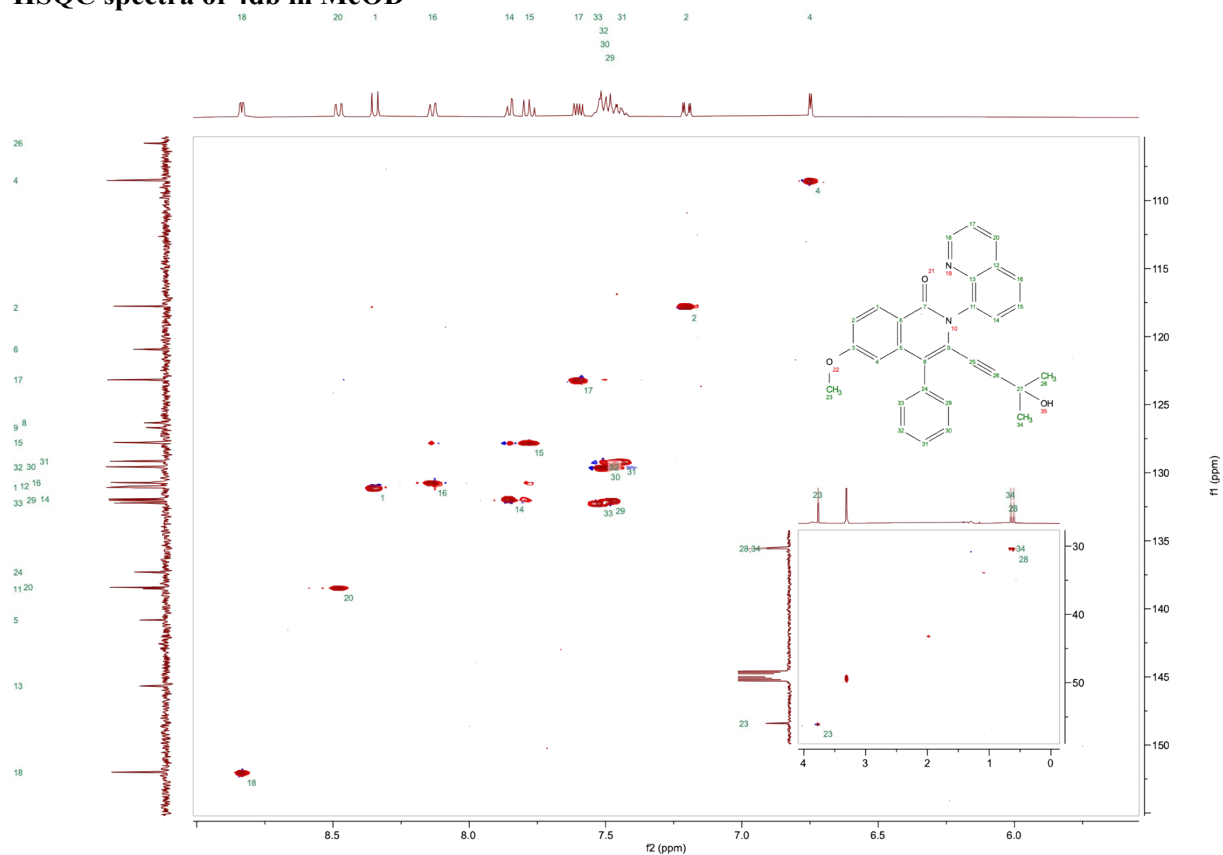

## HMBC spectra of 4db in MeOD

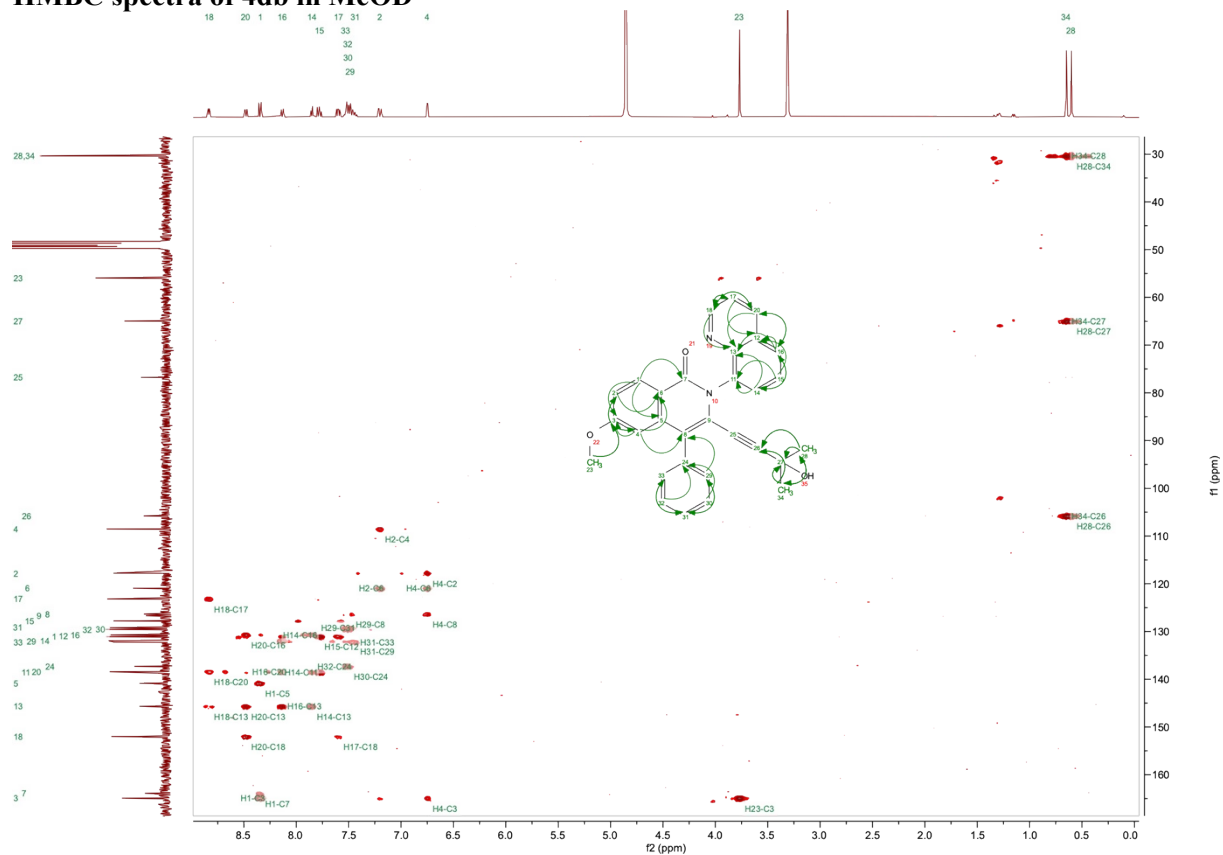

# COSY spectra of 4db in MeOD

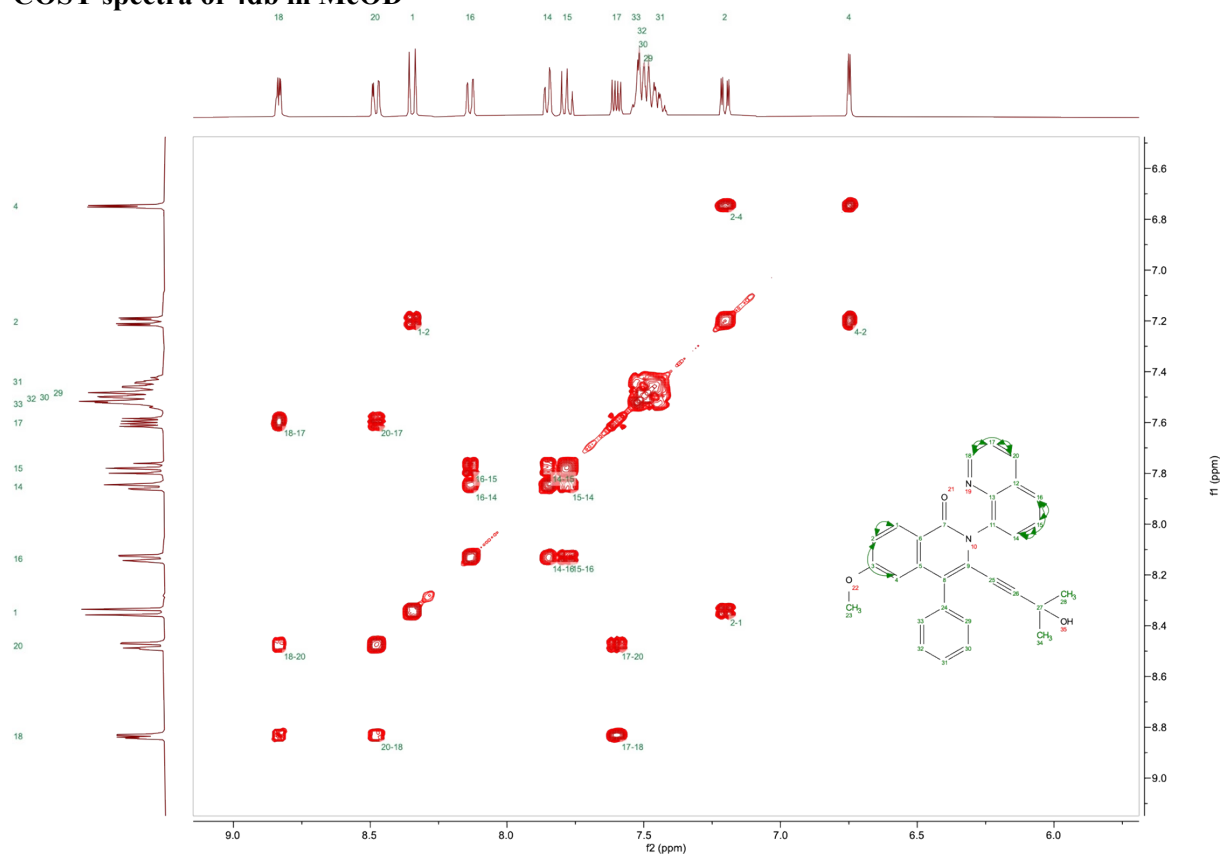

### HRMS spectra of 4db

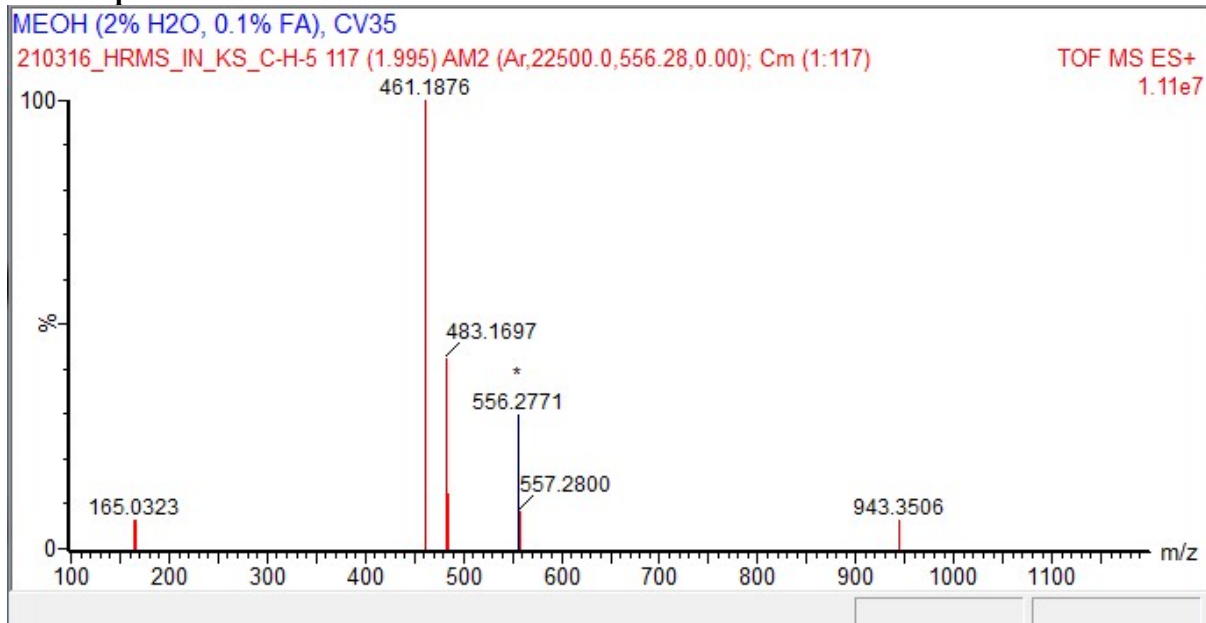

#### Single Mass Analysis

Tolerance = 2.0 mDa / DBE: min = -0.5, max = 100.0

Element prediction: Off

Number of isotope peaks used for i-FIT = 3

Monoisotopic Mass, Even Electron Ions

179 formula(e) evaluated with 2 results within limits (all results (up to 1000) for each mass)

Elements Used:

C: 0-50      H: 1-100      N: 0-3      O: 0-3      Na: 0-1

| Mass     | Calc. Mass | mDa  | PPM  | DBE  | Formula       | i-FIT | Fit Conf % | C  | H  | N | O | Na |
|----------|------------|------|------|------|---------------|-------|------------|----|----|---|---|----|
| 461.1876 | 461.1881   | -0.5 | -1.1 | 20.5 | C33 H26 O Na  | 47.7  | 0.73.87    | 33 | 26 |   | 1 | 1  |
|          | 461.1865   | 1.1  | 2.4  | 19.5 | C30 H25 N2 O3 | 48.8  | 1.26.13    | 30 | 25 | 2 | 3 |    |

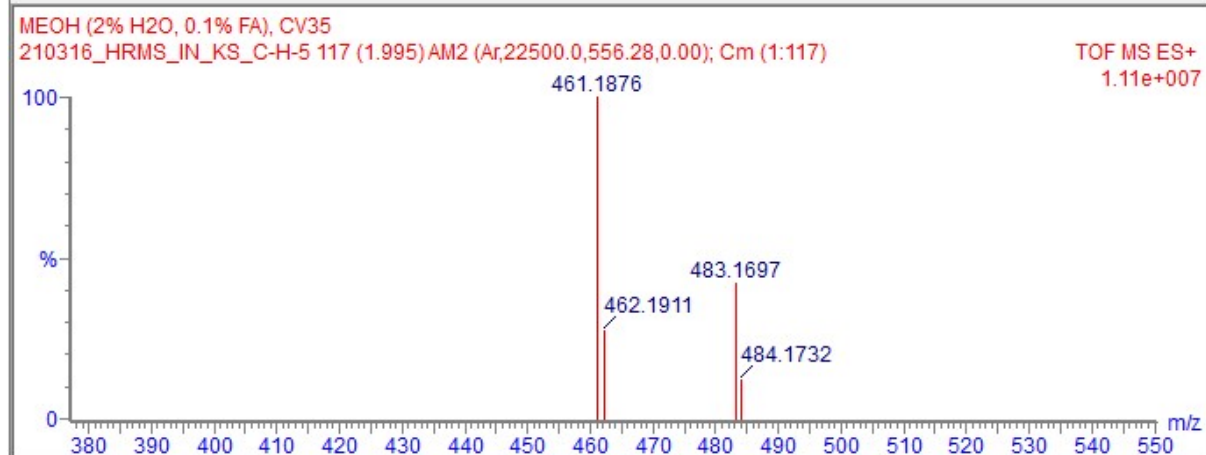



### HSQC spectra of 4eb in CDCl<sub>3</sub>

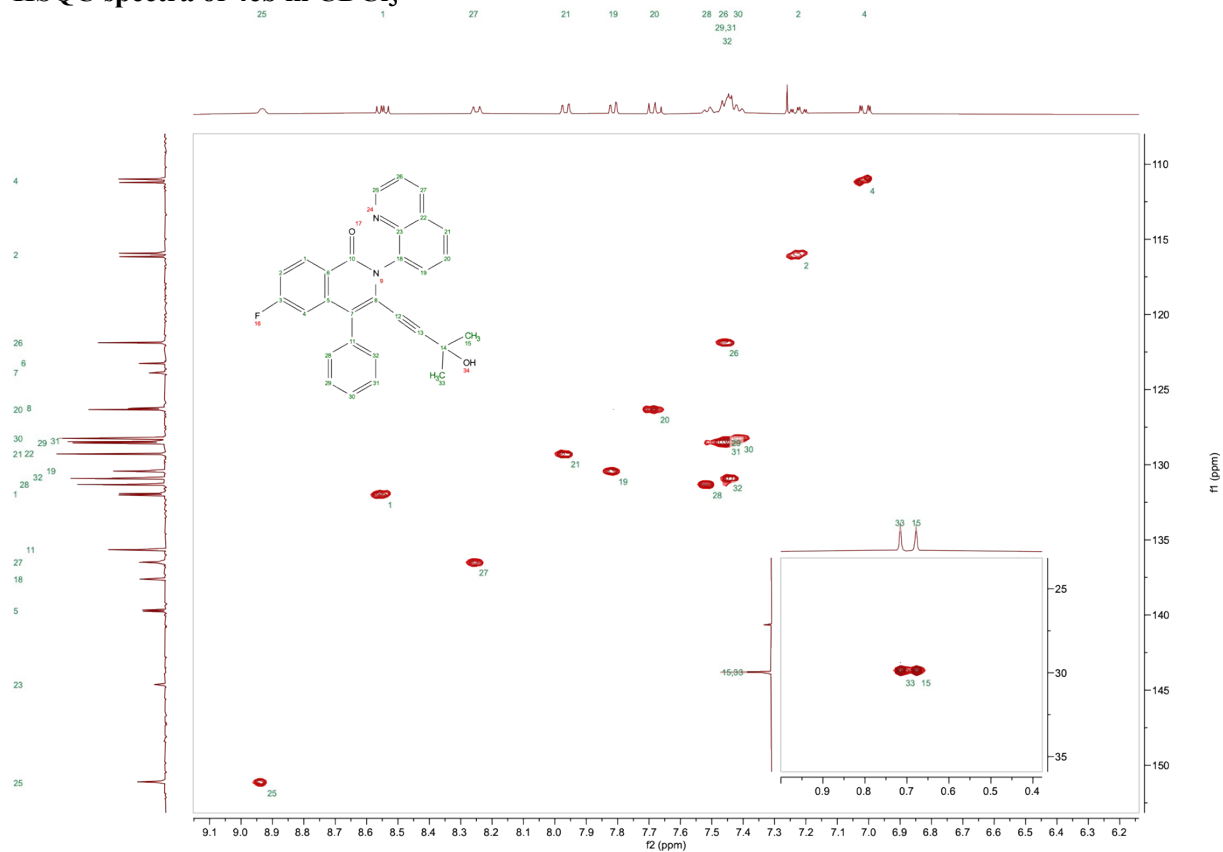

### HMBC spectra of 4eb in CDCl<sub>3</sub>

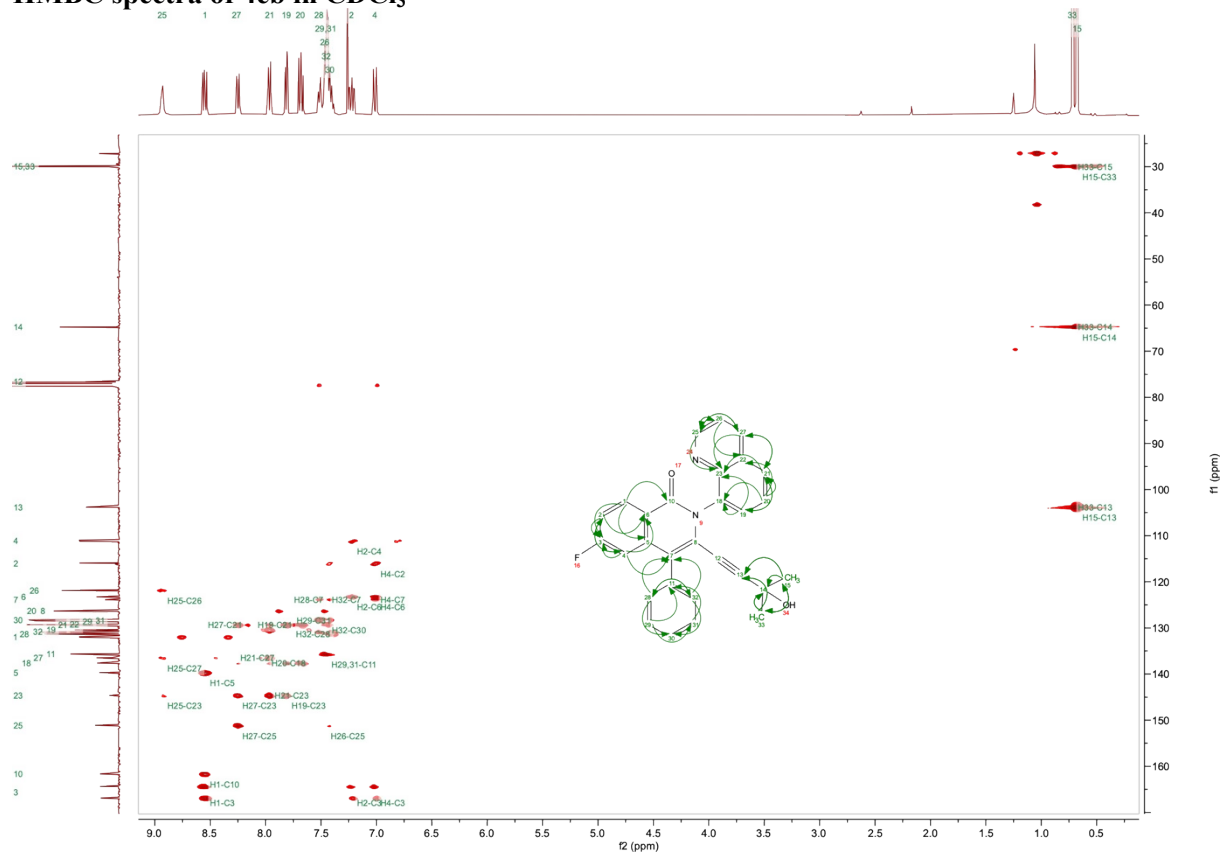



# COSY spectra of 4eb in CDCl<sub>3</sub>

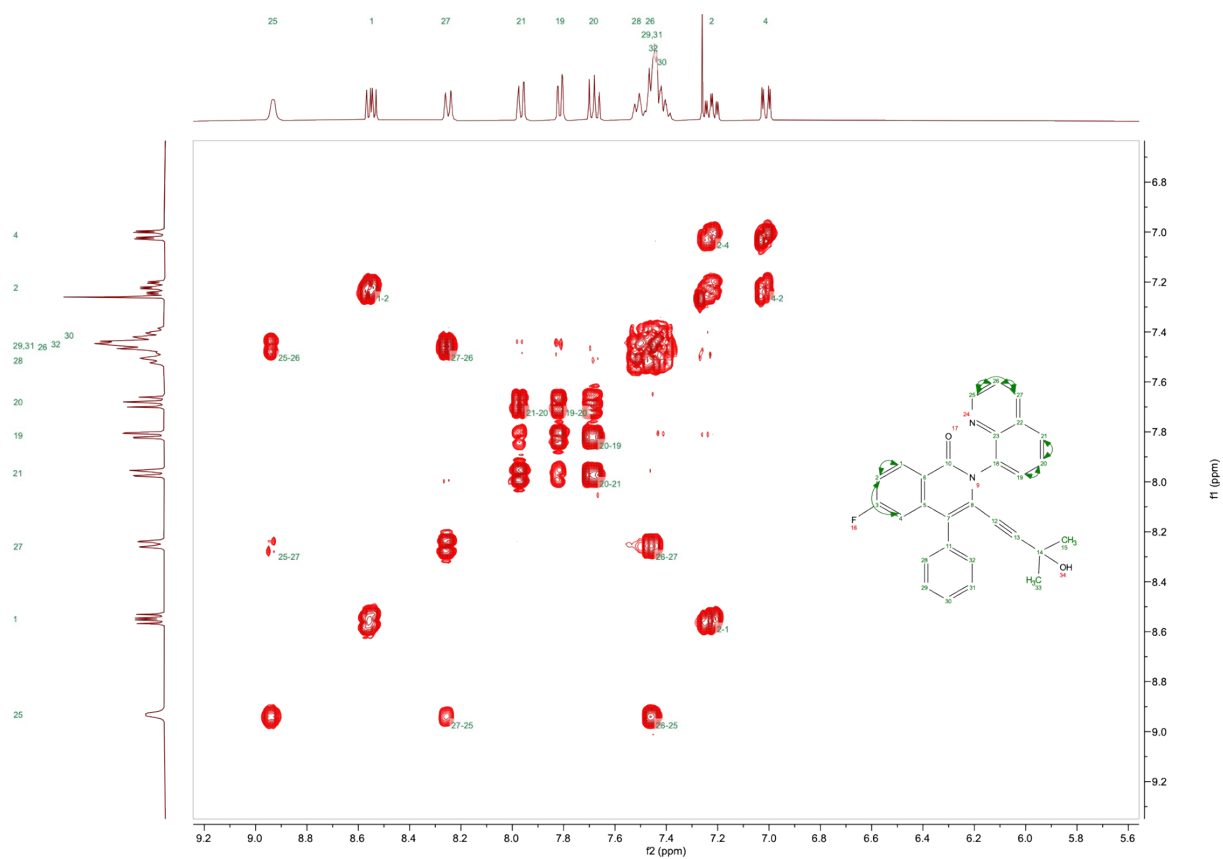

### HRMS spectra of 4eb

MEOH (2% H<sub>2</sub>O, 0.1% FA), CV35

210318\_HRMS\_IN\_KS\_C-H-3 1 (0.034) AM2 (Ar,22500.0,556.28,0.00); Cm (1:117)

TOF MS ES+  
1.39e7

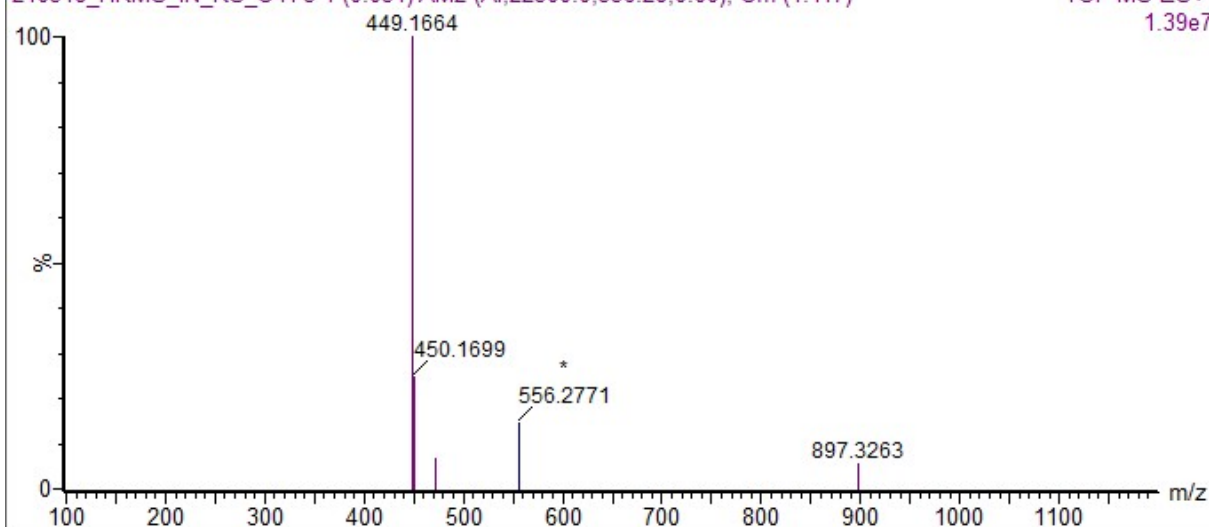

#### Single Mass Analysis

Tolerance = 2.0 mDa / DBE: min = -0.5, max = 100.0

Element prediction: Off

Number of isotope peaks used for i-FIT = 3

Monoisotopic Mass, Even Electron Ions

339 formula(e) evaluated with 3 results within limits (all results (up to 1000) for each mass)

Elements Used:

C: 0-50      H: 1-100      N: 0-3      O: 0-3      Na: 0-1      F: 0-1

| Mass     | Calc. Mass | mDa  | PPM  | DBE  | Formula                                                         | i.    | Fit Conf % | C  | H  | N | O | Na | F |
|----------|------------|------|------|------|-----------------------------------------------------------------|-------|------------|----|----|---|---|----|---|
| 449.1664 | 449.1665   | -0.1 | -0.2 | 19.5 | C <sub>29</sub> H <sub>22</sub> N <sub>2</sub> O <sub>2</sub> F | 40... | 70.55      | 29 | 22 | 2 | 2 |    | 1 |
|          | 449.1654   | 1.0  | 2.2  | 23.5 | C <sub>32</sub> H <sub>21</sub> N <sub>2</sub> O                | 41... | 20.55      | 32 | 21 | 2 | 1 |    |   |
|          | 449.1681   | -1.7 | -3.8 | 20.5 | C <sub>32</sub> H <sub>23</sub> Na F                            | 52... | 8.90       | 32 | 23 |   |   | 1  | 1 |

MEOH (2% H<sub>2</sub>O, 0.1% FA), CV35

210318\_HRMS\_IN\_KS\_C-H-3 1 (0.034) AM2 (Ar,22500.0,556.28,0.00); Cm (1:117)

TOF MS ES+  
1.39e+007

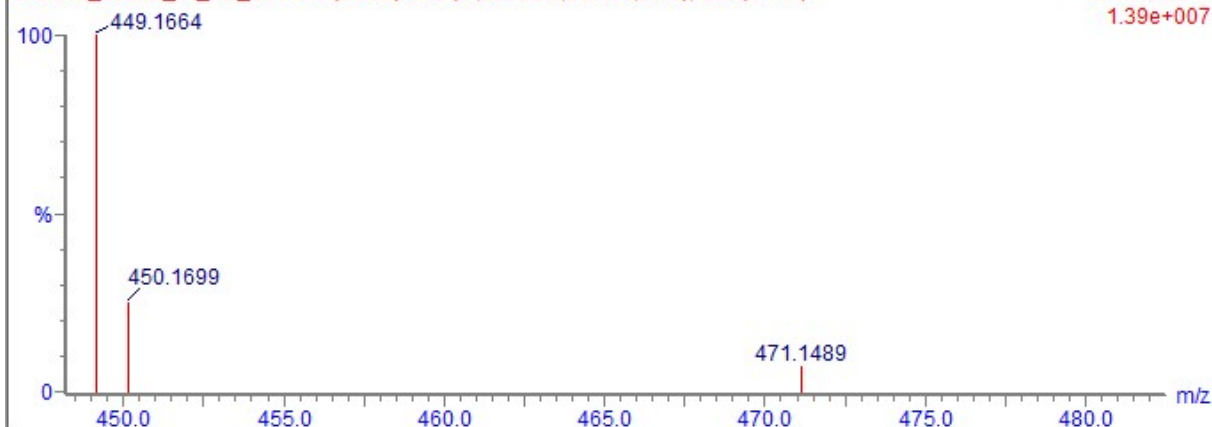

4fb

<sup>1</sup>H spectra of 4fb in DMSO-d<sub>6</sub>

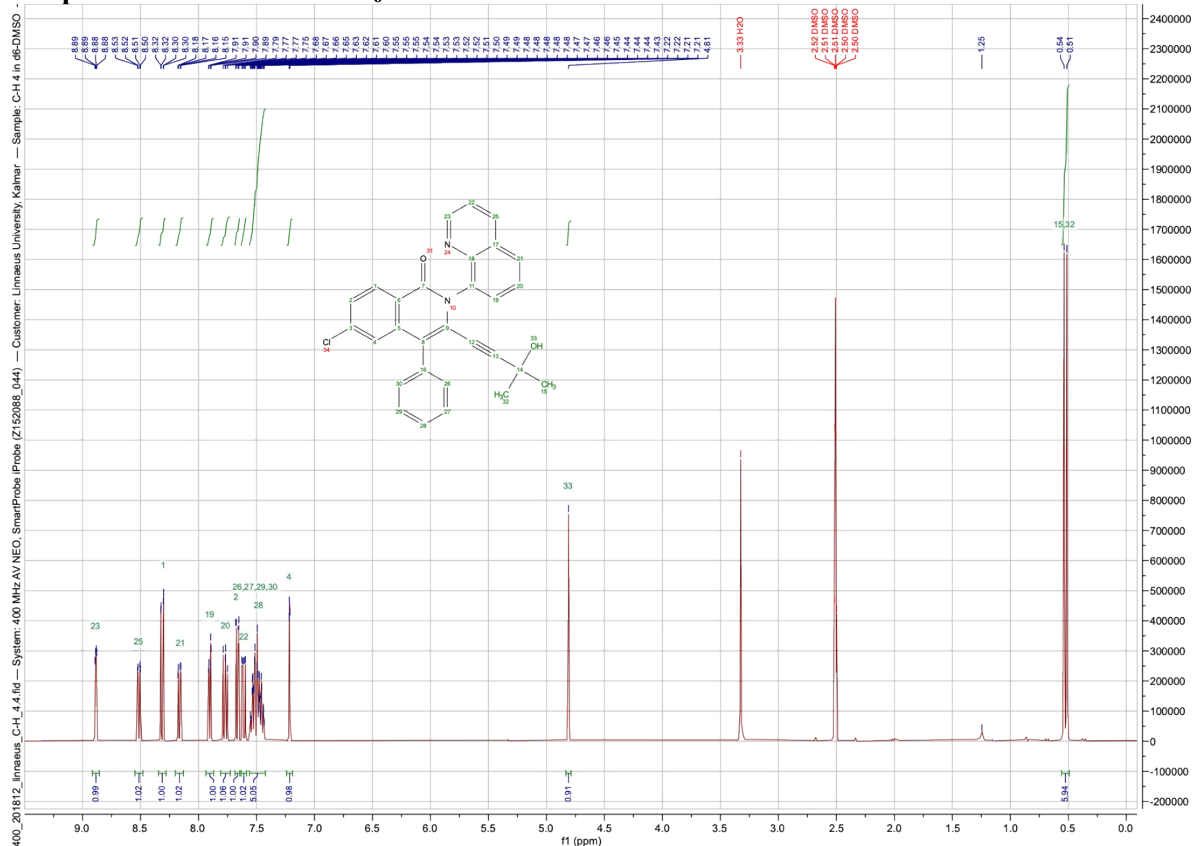

<sup>13</sup>C spectra of 4fb in DMSO-d<sub>6</sub>

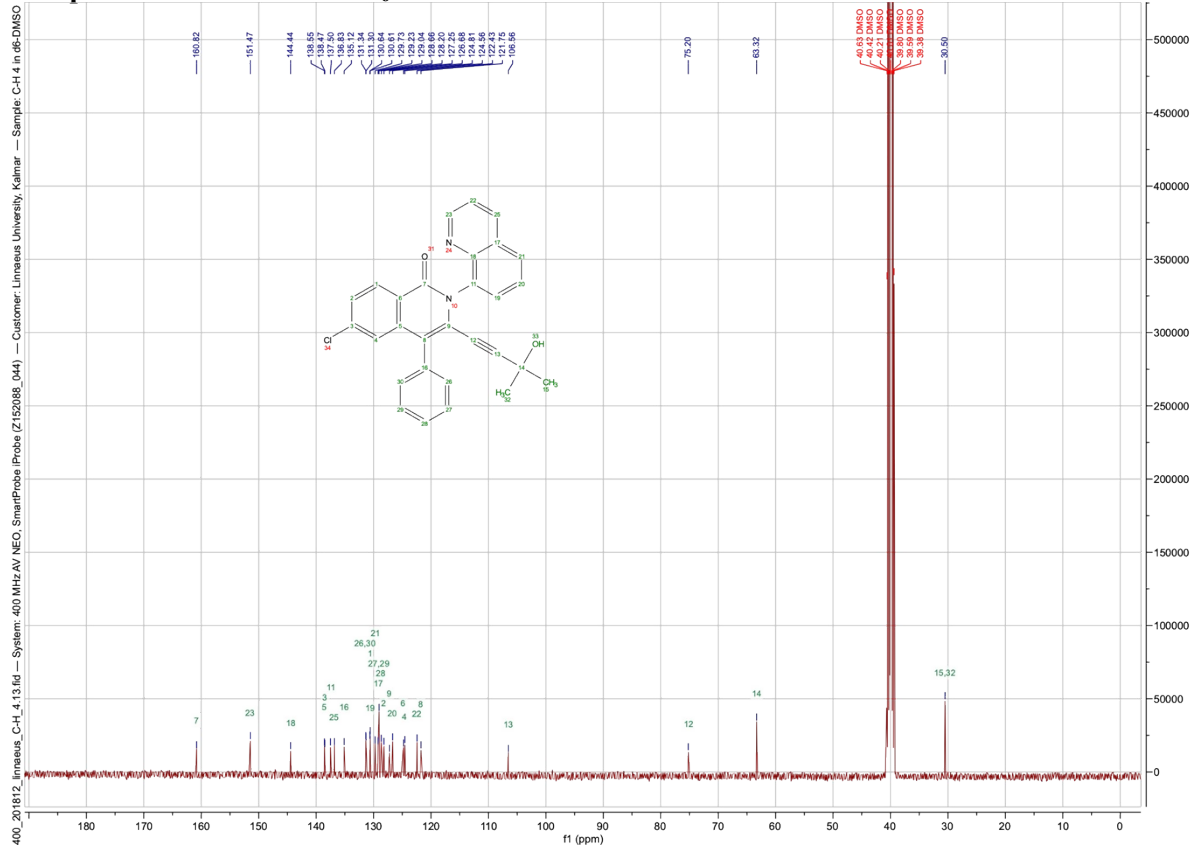

### HSQC spectra of 4fb in DMSO-*d*<sub>6</sub>

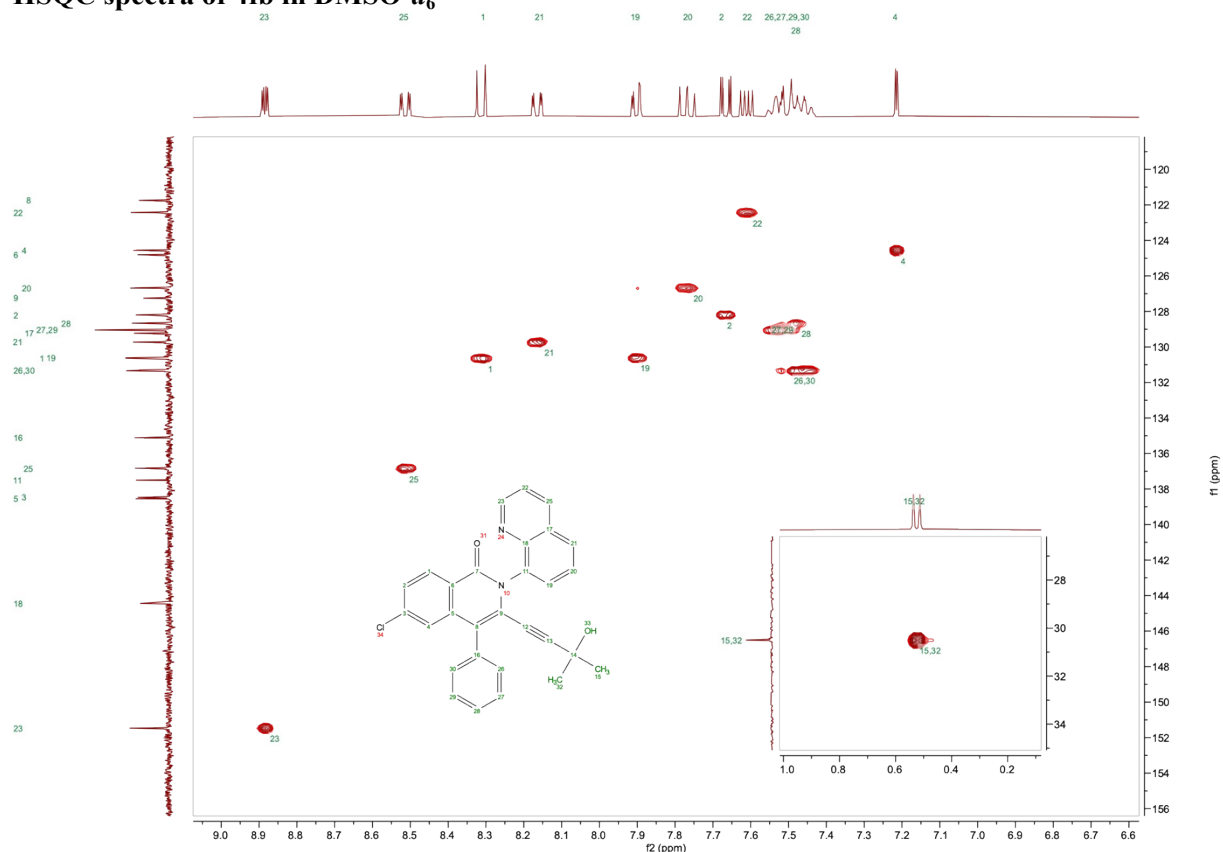

### HMBC spectra of 4fb in DMSO-*d*<sub>6</sub>

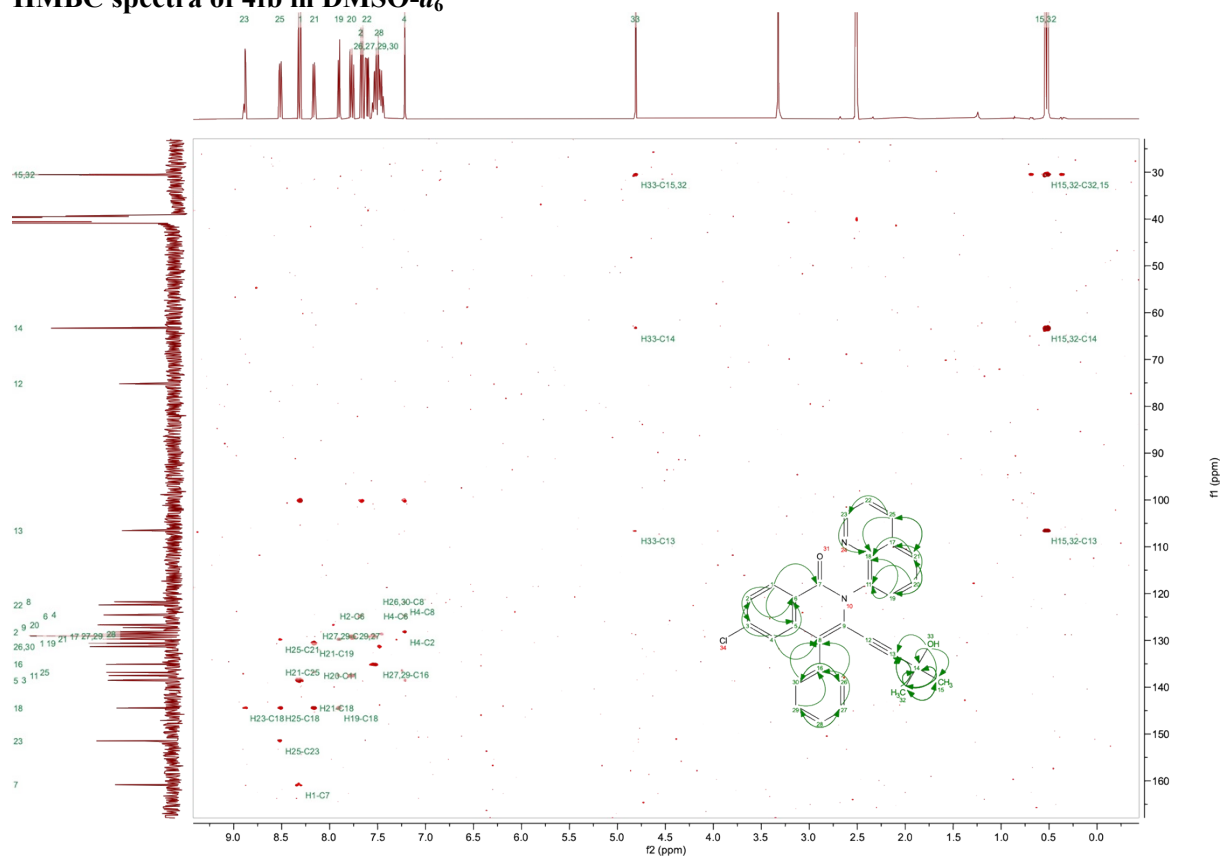

### COSY spectra of 4fb in DMSO-*d*<sub>6</sub>

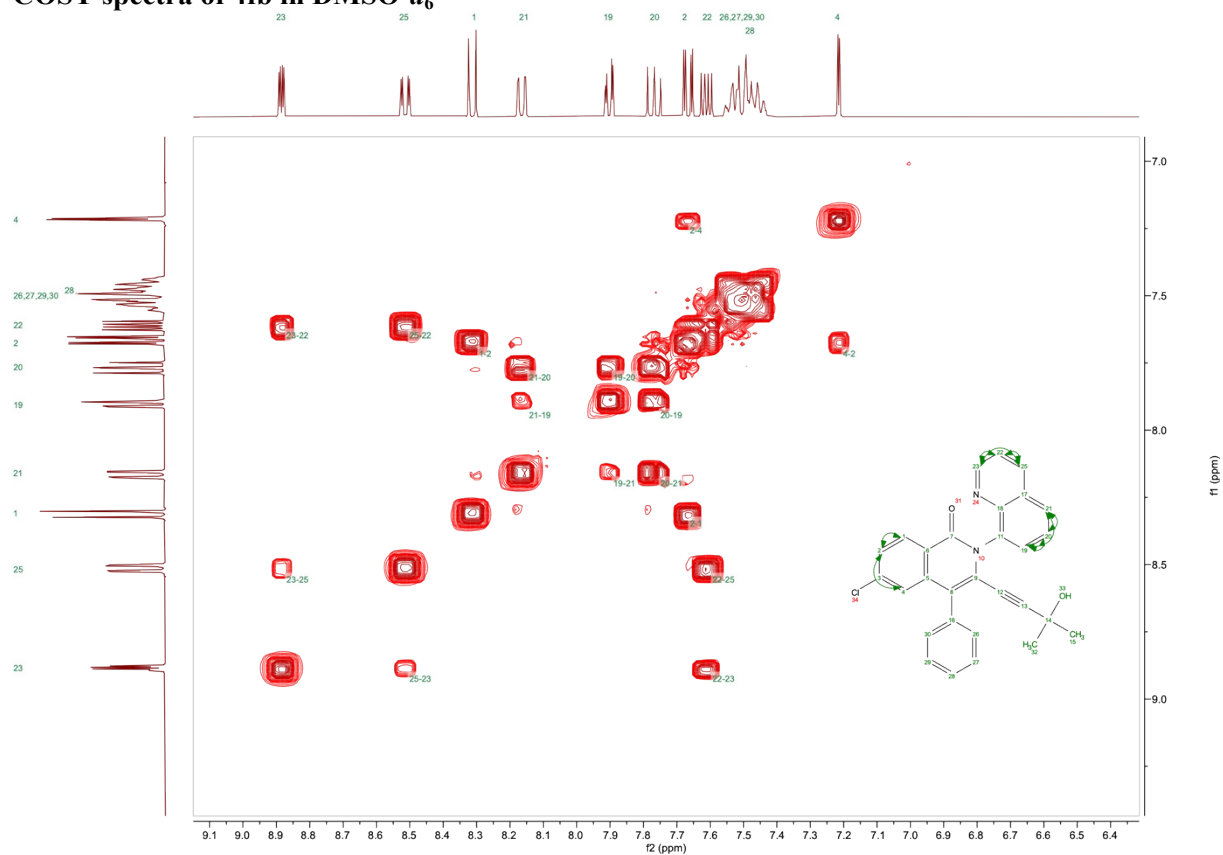

### NOESY spectra of 4fb in DMSO-*d*<sub>6</sub>

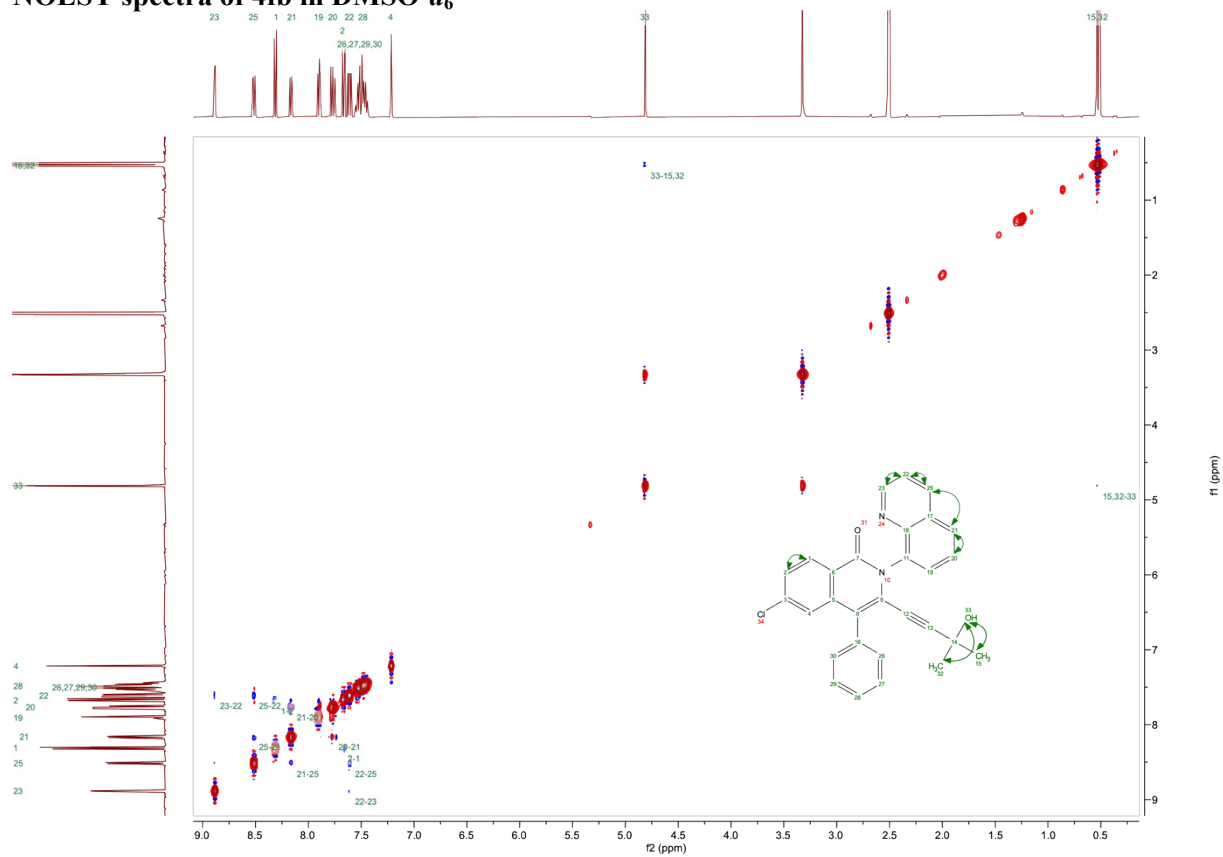

## HRMS spectra of 4fb

MEOH (2% H<sub>2</sub>O, 0.1% FA), CV35

210316\_HRMS\_IN\_KS\_C-H-4 36 (0.626) AM2 (Ar,22500.0,556.28,0.00); Cm (1:117)

TOF MS ES+  
9.58e6

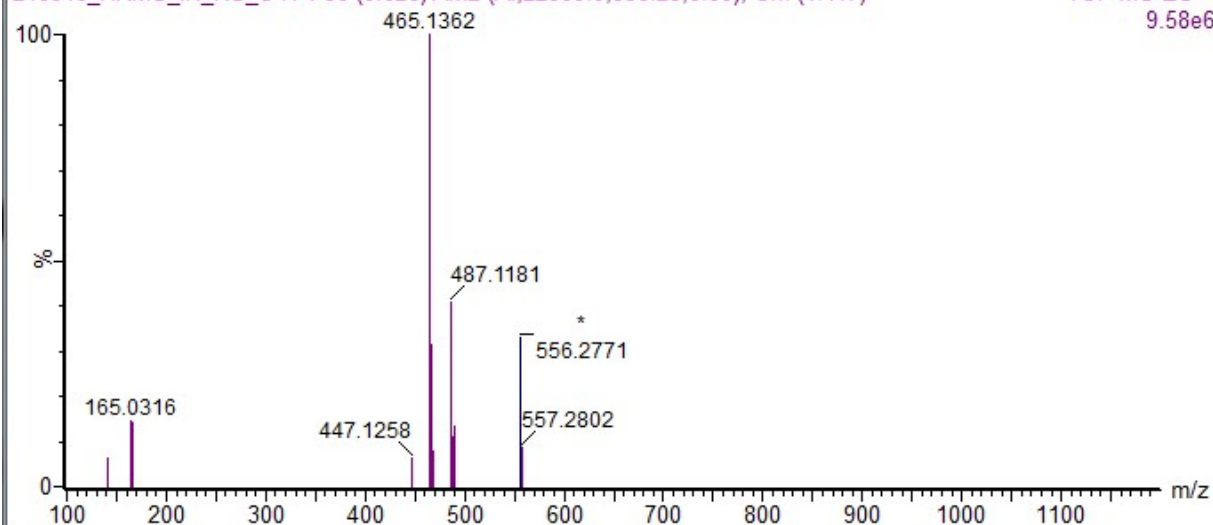

### Single Mass Analysis

Tolerance = 2.0 mDa / DBE: min = -0.5, max = 100.0

Element prediction: Off

Number of isotope peaks used for i-FIT = 3

Monoisotopic Mass, Even Electron Ions

426 formula(e) evaluated with 3 results within limits (all results (up to 1000) for each mass)

Elements Used:

C: 0-50      H: 1-100      N: 0-3      O: 0-4      Na: 0-1      Cl: 0-1

| Mass     | Calc. Mass | mDa  | PPM  | DBE  | Formula             | i. | Fit Conf % | C  | H  | N | O | Na | Cl |
|----------|------------|------|------|------|---------------------|----|------------|----|----|---|---|----|----|
| 465.1362 | 465.1368   | -0.6 | -1.3 | 25.5 | C33 H18 N2 Na       | 4  | 100.00     | 33 | 18 | 2 | 0 | 1  | 0  |
|          | 465.1370   | -0.8 | -1.7 | 19.5 | C29 H22 N2 O2 Cl    | 9  | 76.64      | 29 | 22 | 2 | 2 | 0  | 1  |
|          | 465.1346   | 1.6  | 3.4  | 16.5 | C27 H23 N2 O2 Na Cl | 3  | 23.36      | 27 | 23 | 2 | 2 | 1  | 1  |

MEOH (2% H<sub>2</sub>O, 0.1% FA), CV35

210316\_HRMS\_IN\_KS\_C-H-4 36 (0.626) AM2 (Ar,22500.0,556.28,0.00); Cm (1:117)

TOF MS ES+  
9.58e+006

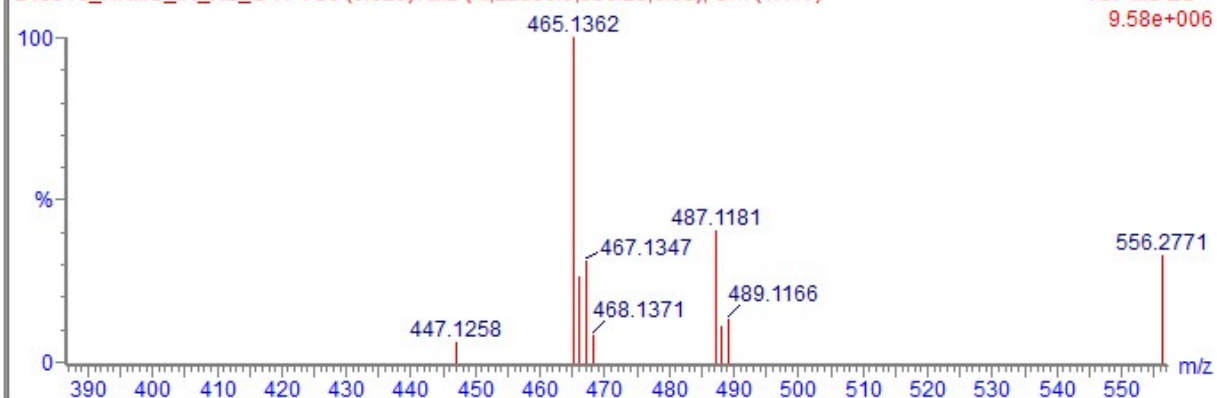

4gb

<sup>1</sup>H spectra of 4gb in MeOD

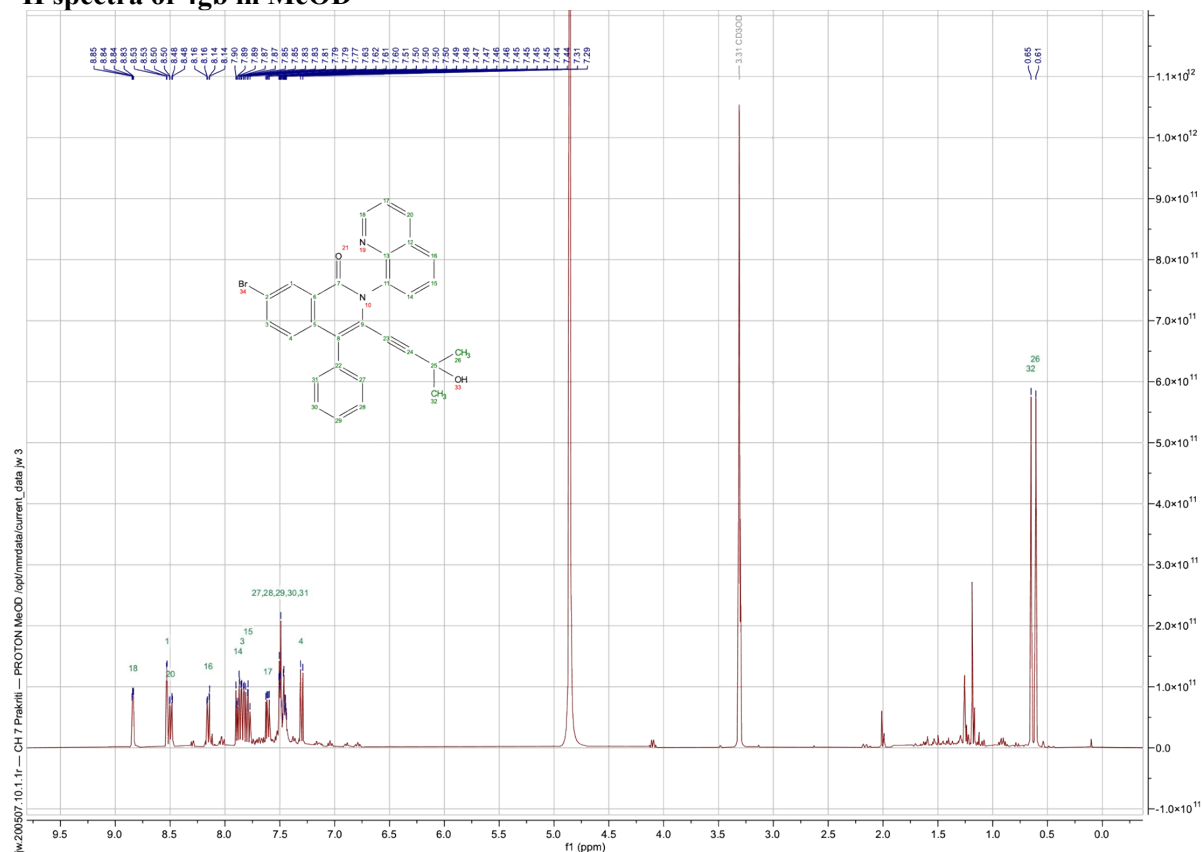

<sup>13</sup>C spectra of 4gb in MeOD

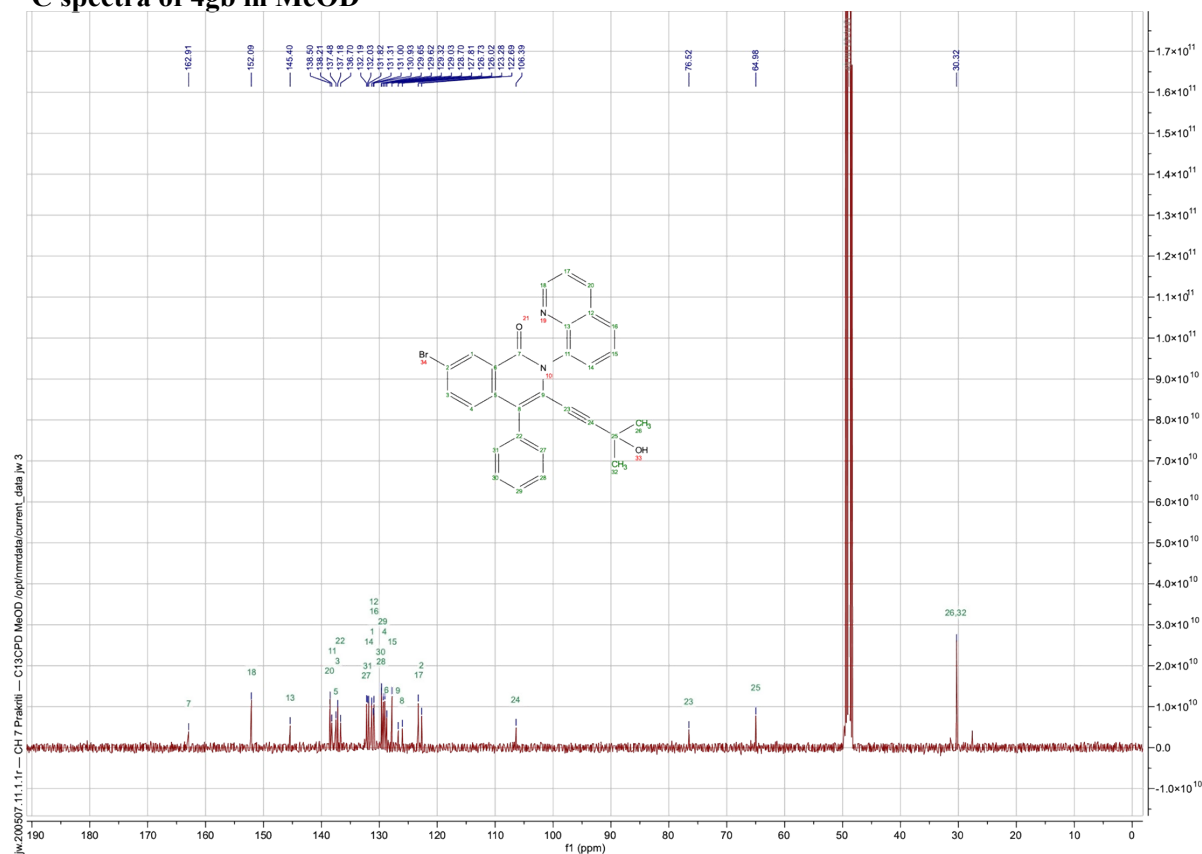

## HSQC spectra of 4gb in MeOD

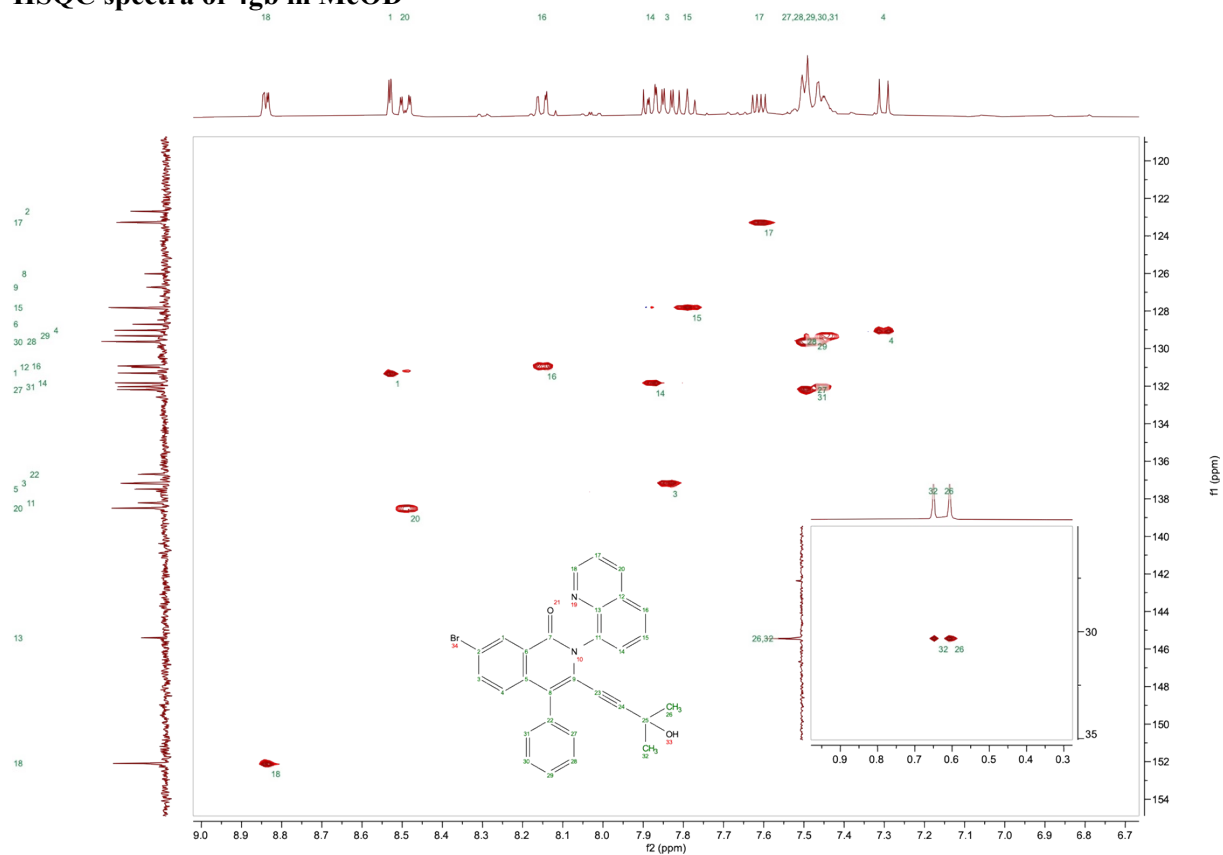

## HMBC spectra of 4gb in MeOD

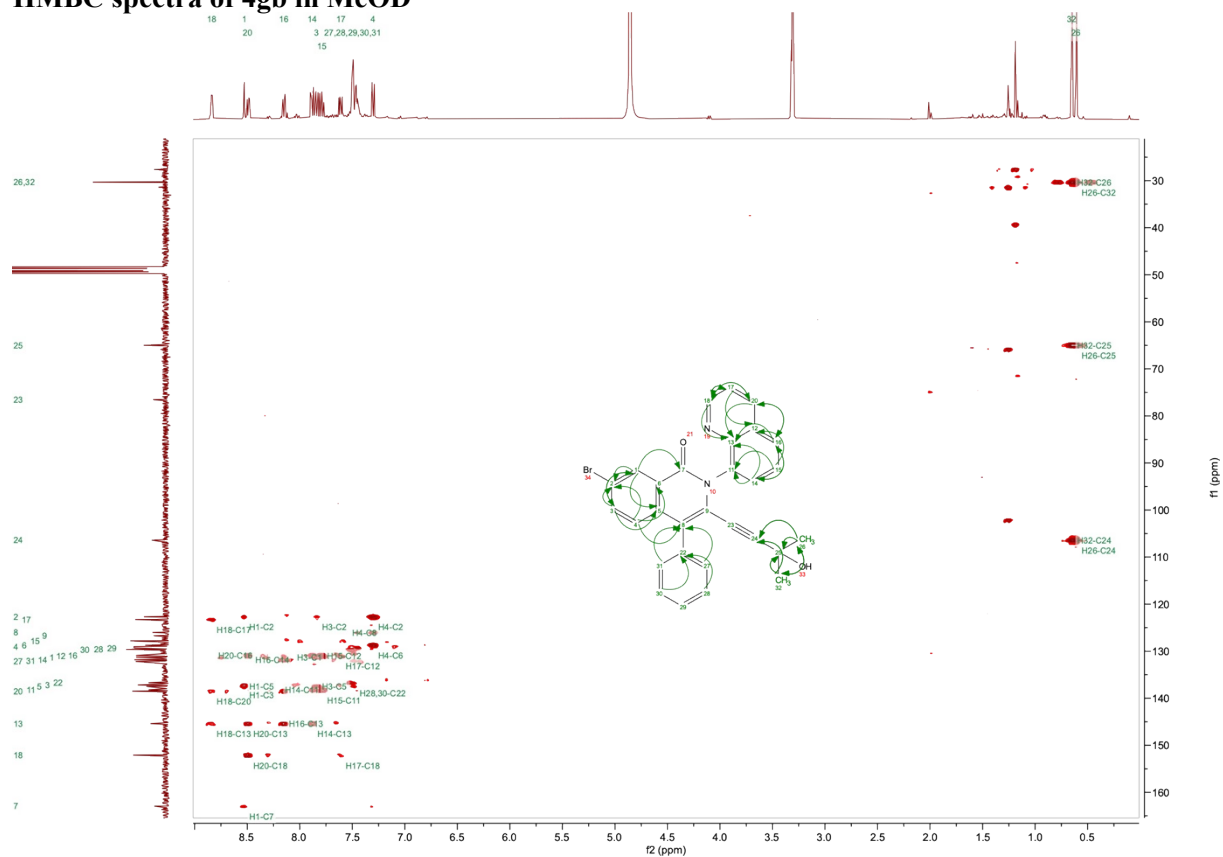



# COSY spectra of 4gb in MeOD

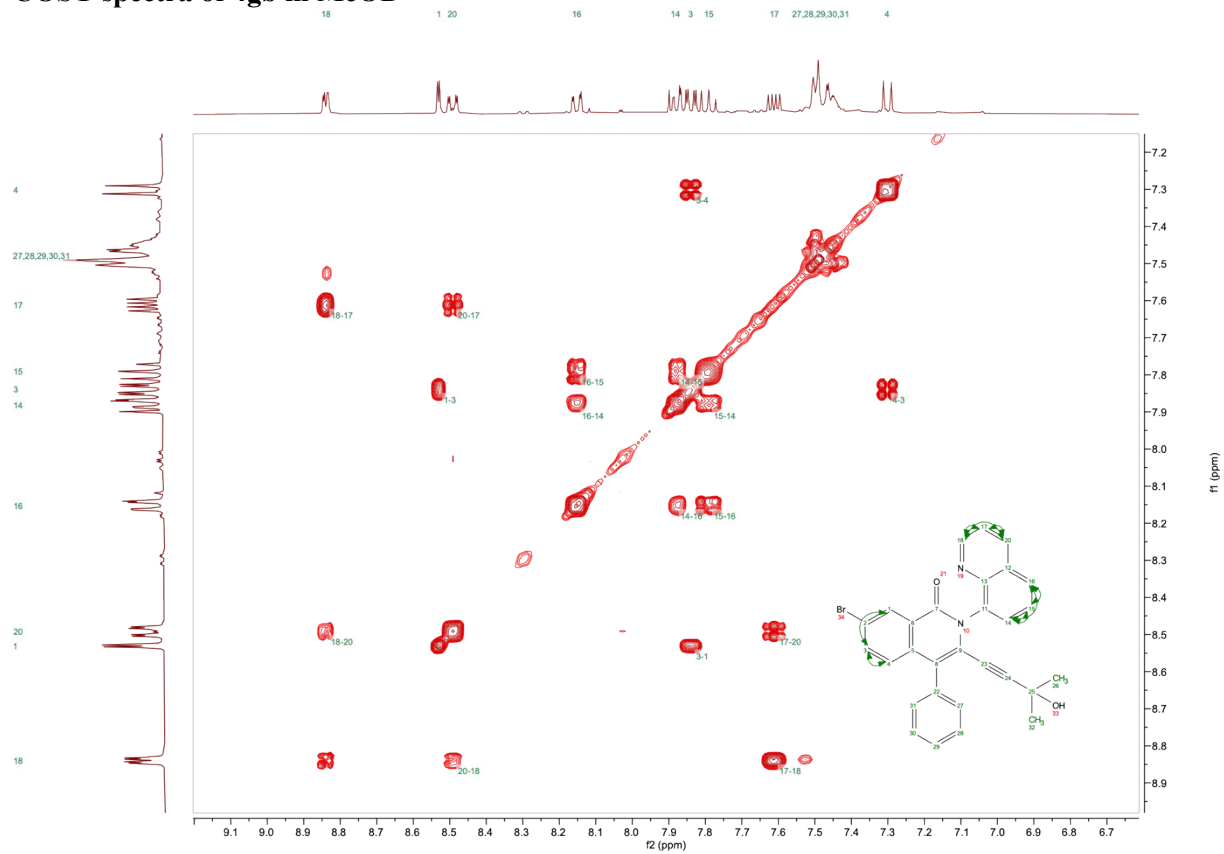

### HRMS spectra of 4gb

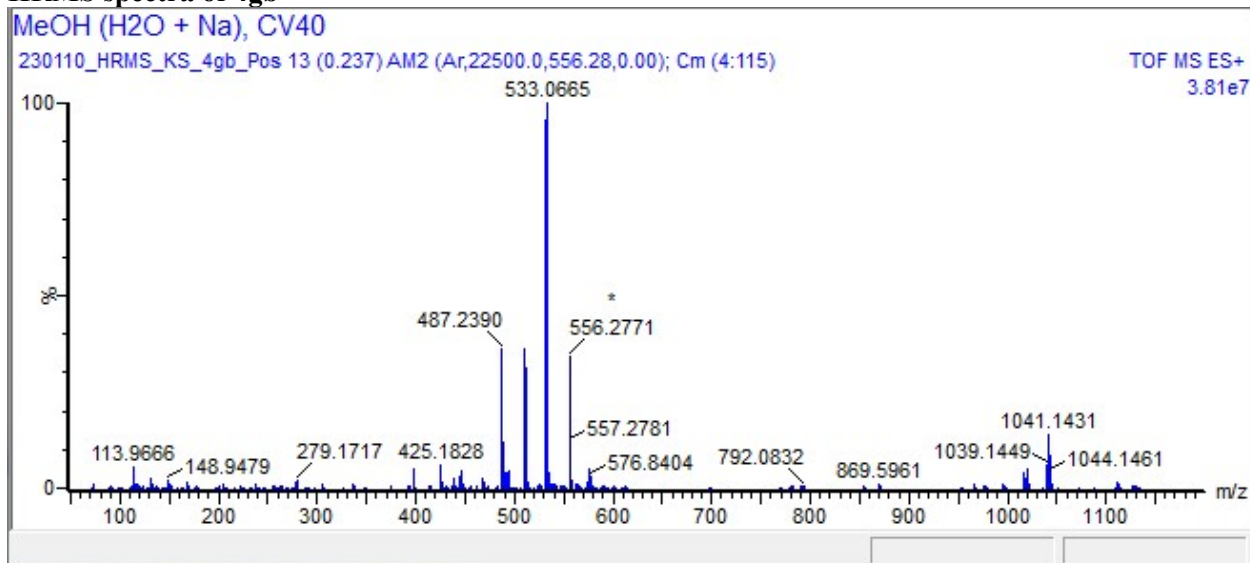

#### Single Mass Analysis

Tolerance = 2.0 mDa / DBE: min = -1.5, max = 100.0

Element prediction: Off

Number of isotope peaks used for i-FIT = 2

Monoisotopic Mass, Even Electron Ions

108 formula(e) evaluated with 1 results within limits (all results (up to 1000) for each mass)

Elements Used:

C: 1-40

H: 1-40

N: 1-4

O: 1-4

Na: 0-1

Br: 1-1

| Mass     | Calc. Mass | mDa | PPM | DBE  | Formula                                                          | i... | i... | Fit Conf % | C  | H  | N | O | Na | Br |
|----------|------------|-----|-----|------|------------------------------------------------------------------|------|------|------------|----|----|---|---|----|----|
| 509.0869 | 509.0865   | 0.4 | 0.8 | 19.5 | C <sub>29</sub> H <sub>22</sub> N <sub>2</sub> O <sub>2</sub> Br | 3... | n... | n/a        | 29 | 22 | 2 | 2 | 1  |    |

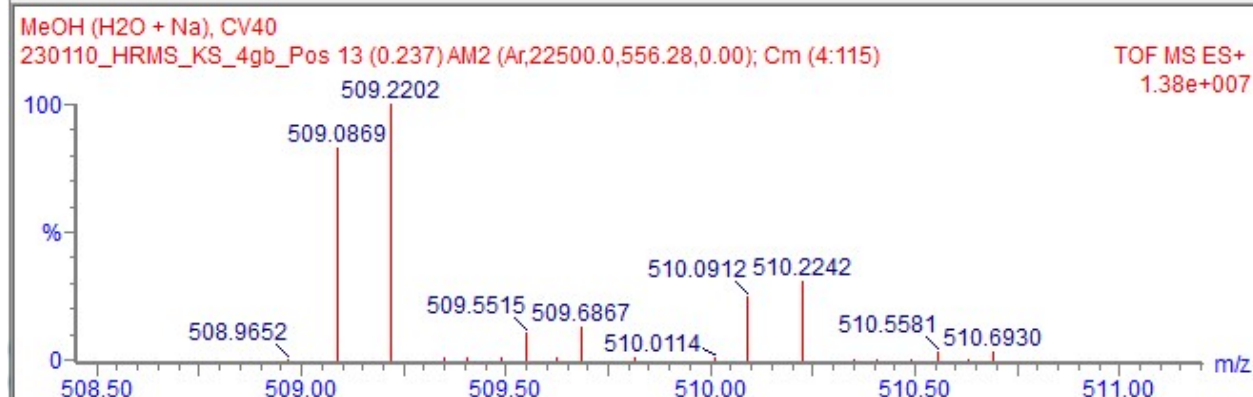



### HSQC spectra of 5ac in CDCl<sub>3</sub>

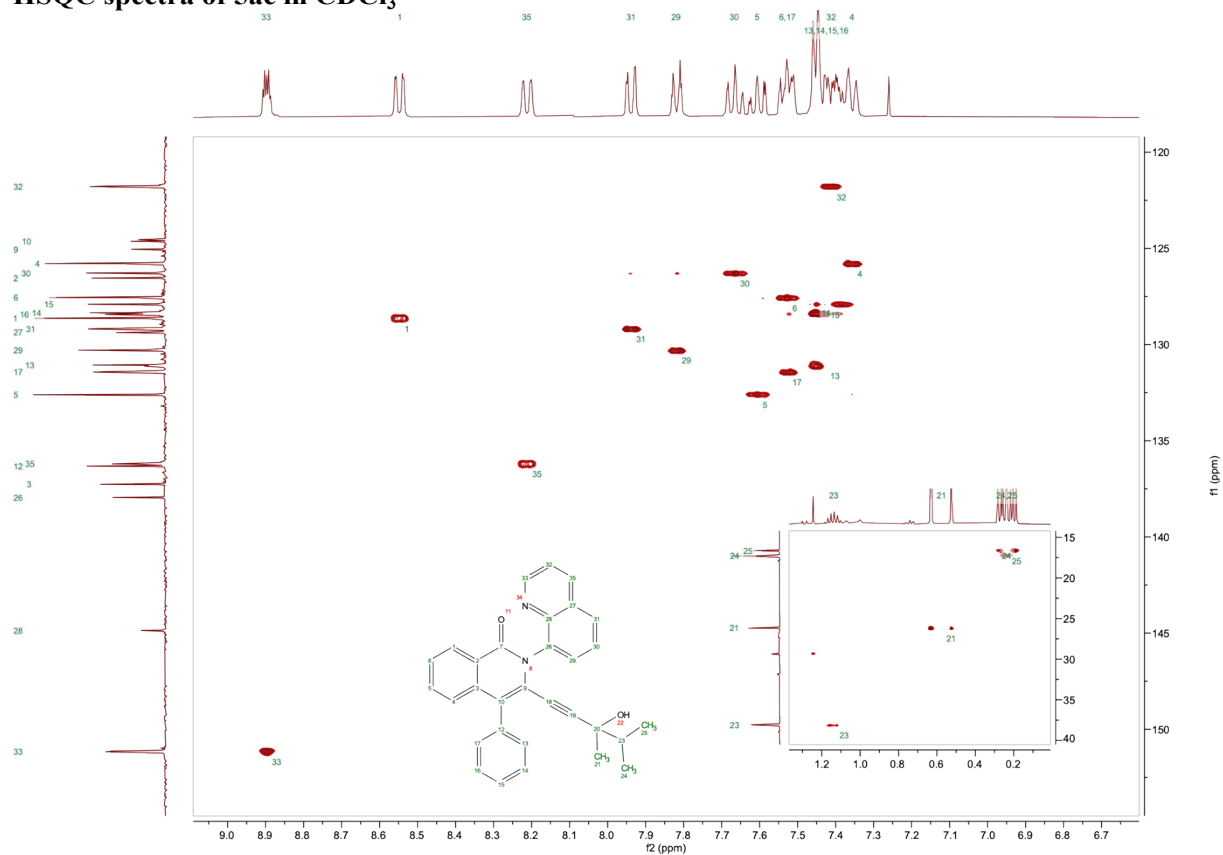

### HMBC spectra of 5ac in CDCl<sub>3</sub>

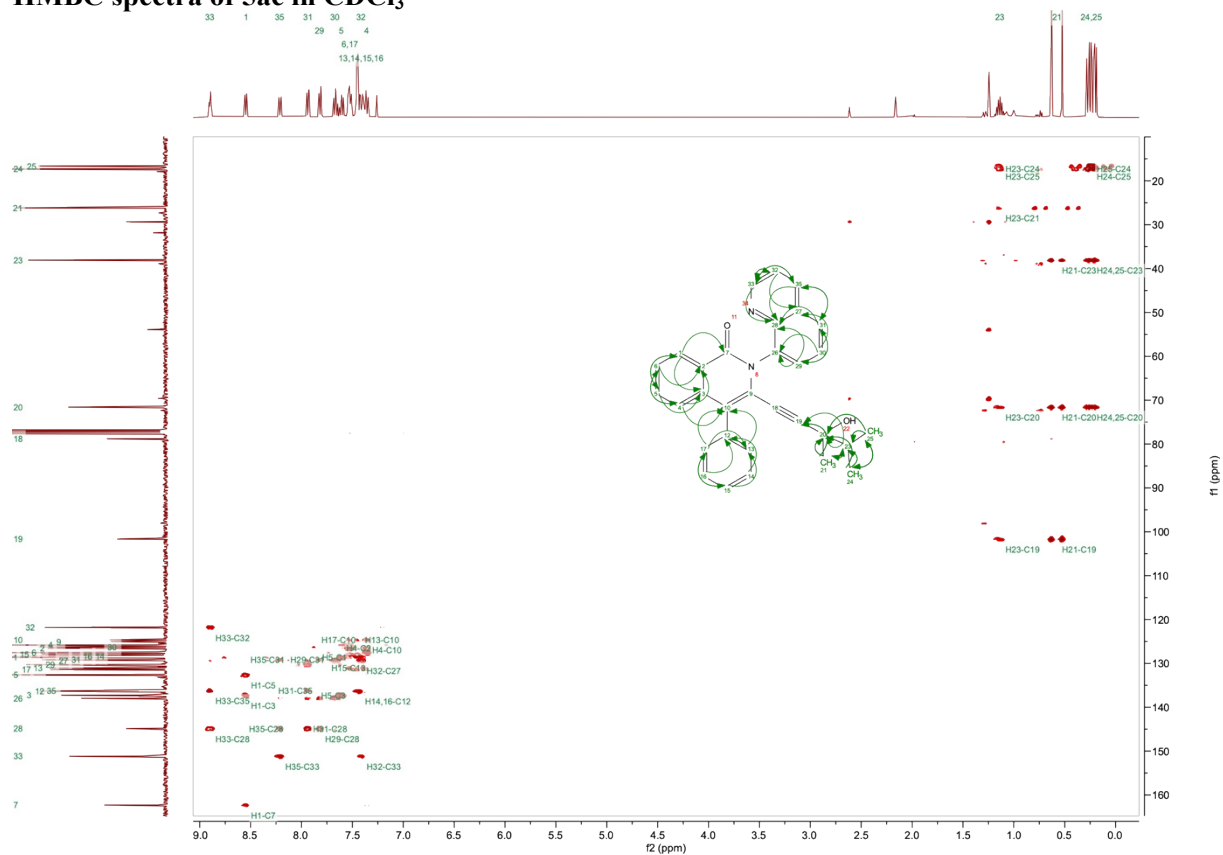

### COSY spectra of 5ac in CDCl<sub>3</sub>

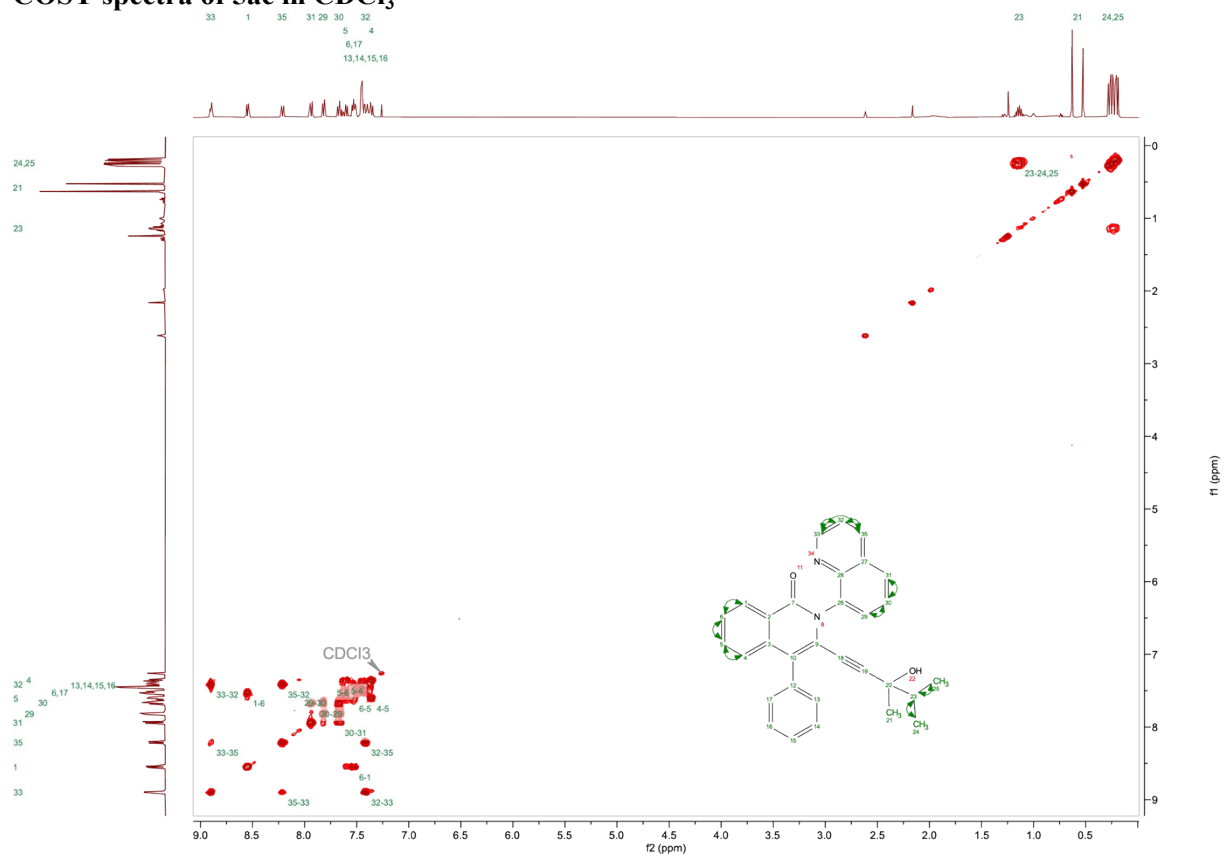

### NOESY spectra of 5ac in CDCl<sub>3</sub>

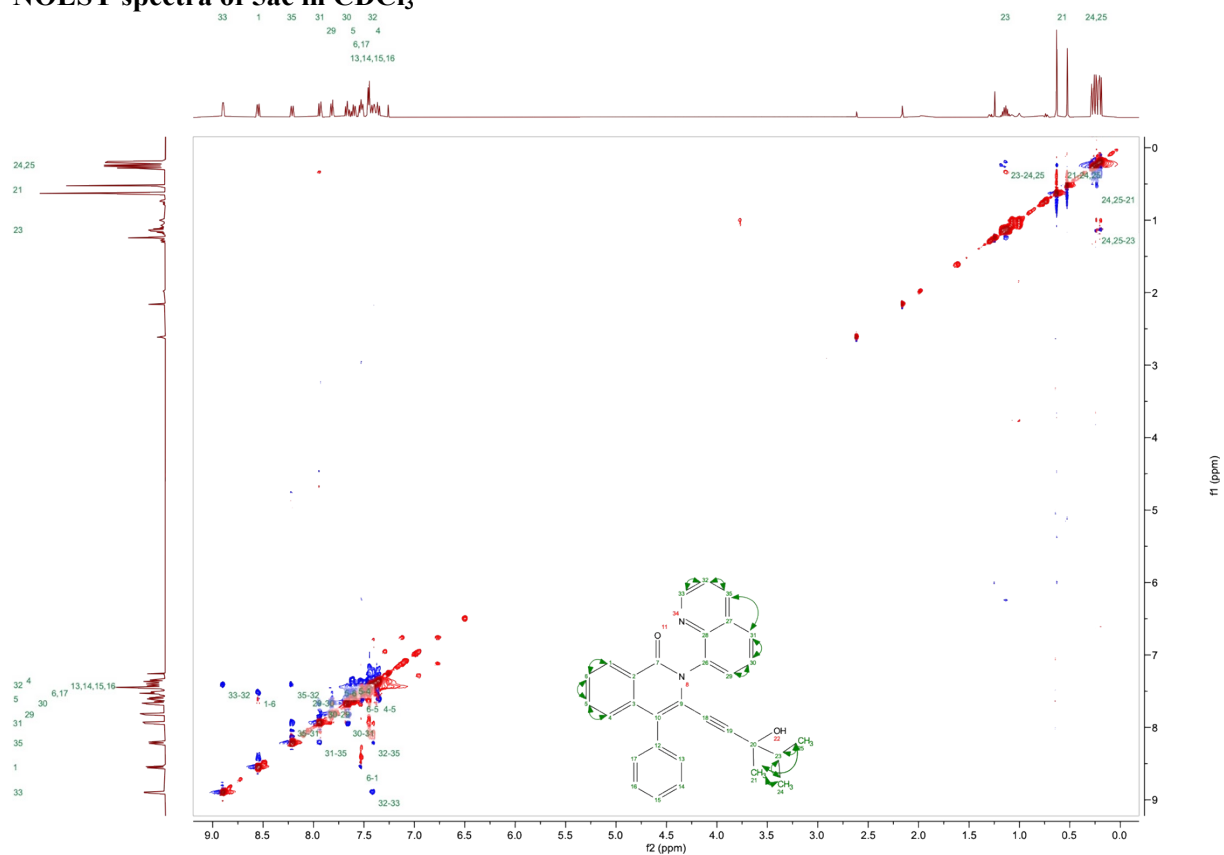

### HRMS spectra of 5ac

MEOH (2% H<sub>2</sub>O, 0.1% FA), CV35

210318\_HRMS\_IN\_KS\_C-C-H 2 (0.051) AM2 (Ar,22500.0,556.28,0.00); Cm (1:117)

TOF MS ES+  
1.06e7

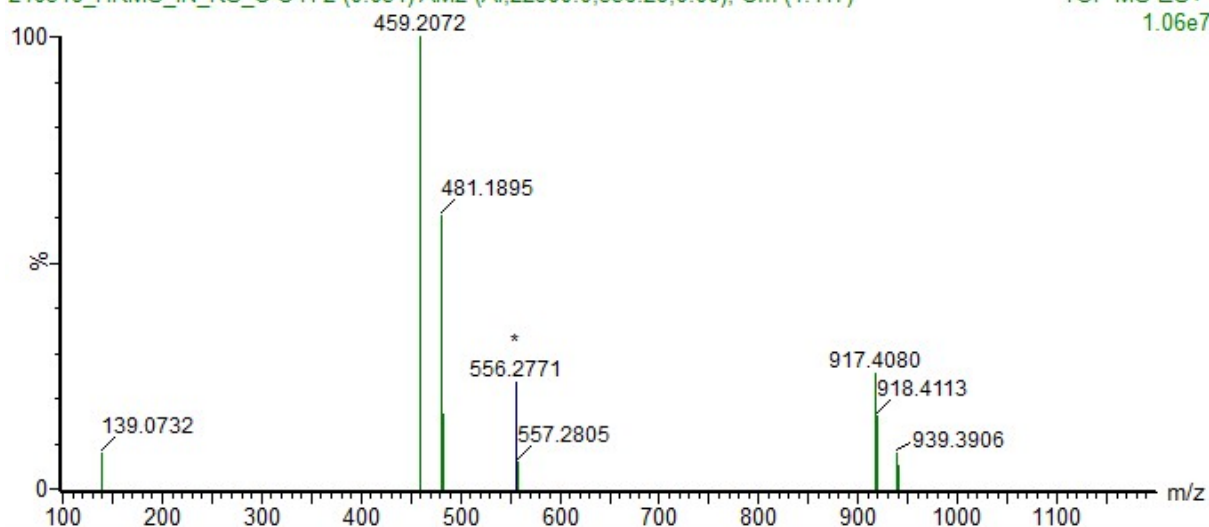

#### Single Mass Analysis

Tolerance = 2.0 mDa / DBE: min = -0.5, max = 100.0

Element prediction: Off

Number of isotope peaks used for i-FIT = 3

Monoisotopic Mass, Even Electron Ions

179 formula(e) evaluated with 2 results within limits (all results (up to 1000) for each mass)

Elements Used:

C: 0-50      H: 1-100      N: 0-3      O: 0-3      Na: 0-1

| Mass     | Calc. Mass | mDa  | PPM  | DBE  | Formula       | i...  | Fit Conf % | C  | H  | N | O | Na |
|----------|------------|------|------|------|---------------|-------|------------|----|----|---|---|----|
| 459.2072 | 459.2073   | -0.1 | -0.2 | 19.5 | C31 H27 N2 O2 | 40... | 85.67      | 31 | 27 | 2 | 2 |    |
|          | 459.2089   | -1.7 | -3.7 | 20.5 | C34 H28 Na    | 41... | 14.33      | 34 | 28 |   |   | 1  |

MEOH (2% H<sub>2</sub>O, 0.1% FA), CV35

210318\_HRMS\_IN\_KS\_C-C-H 2 (0.051) AM2 (Ar,22500.0,556.28,0.00); Cm (1:117)

TOF MS ES+  
1.06e+007

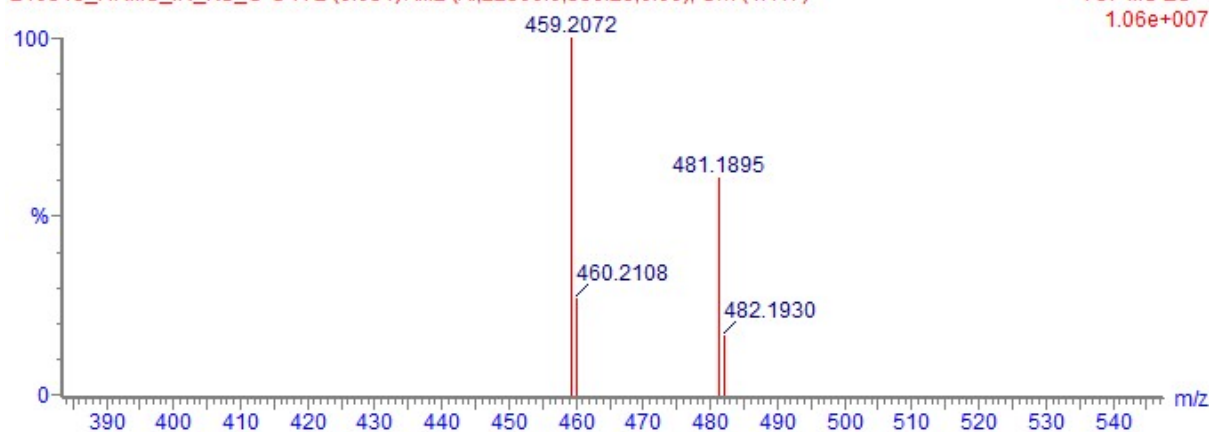



### HSQC spectra of 6ad in CDCl<sub>3</sub>

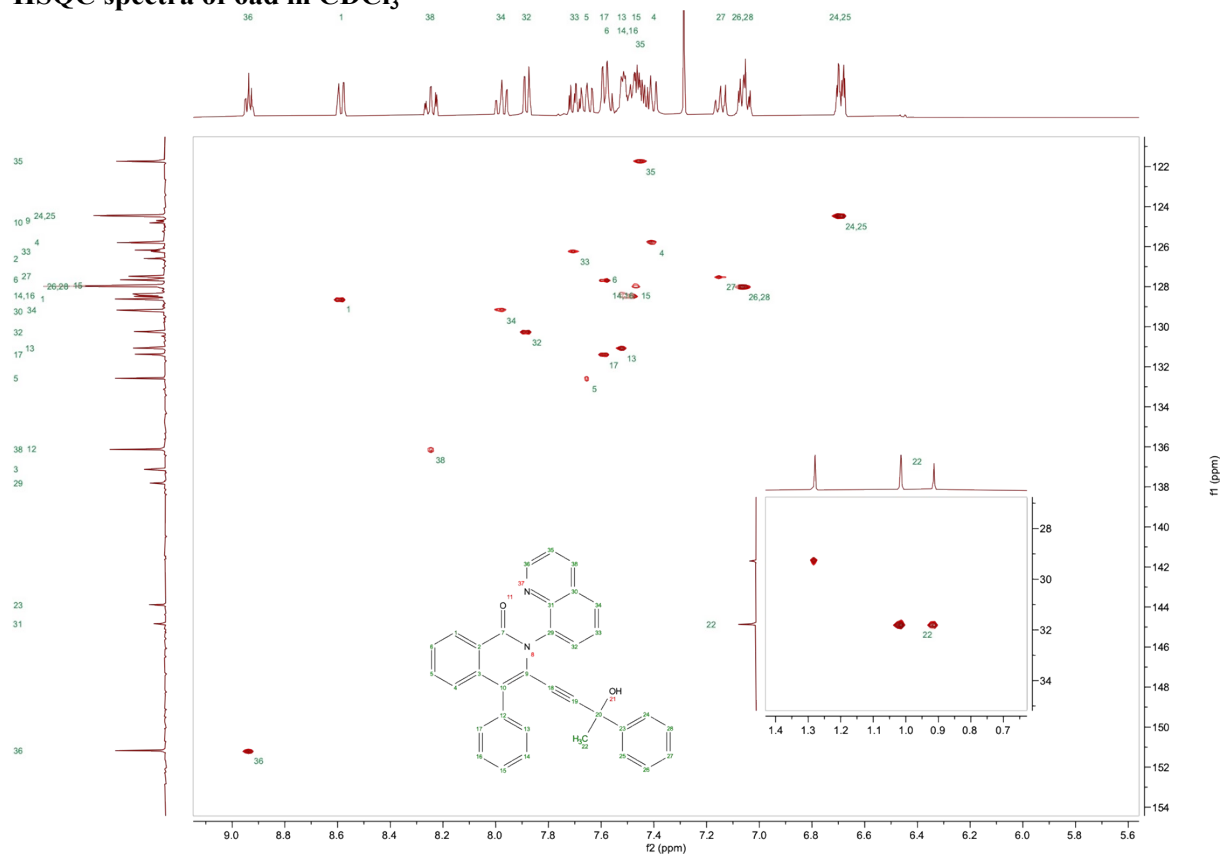

### HMBC spectra of 6ad in CDCl<sub>3</sub>

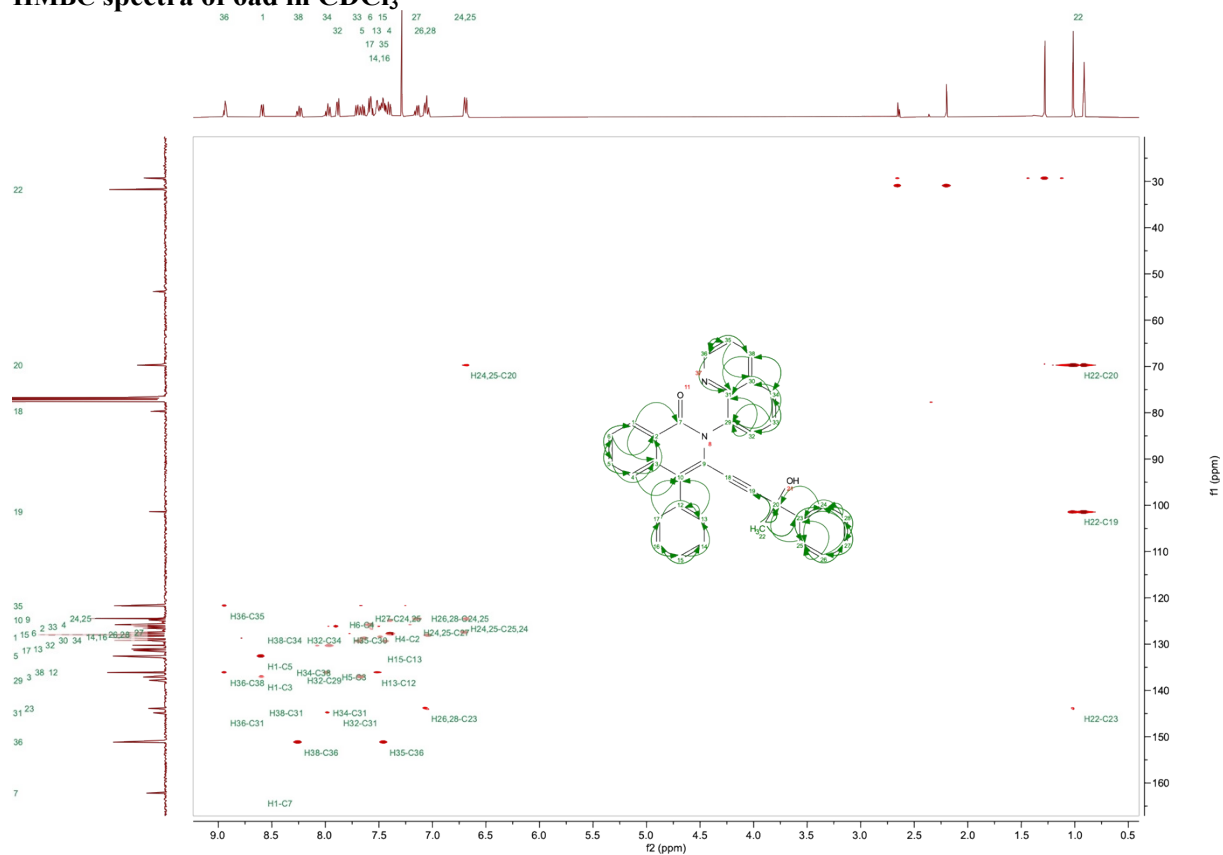



### COSY spectra of 6ad in CDCl<sub>3</sub>

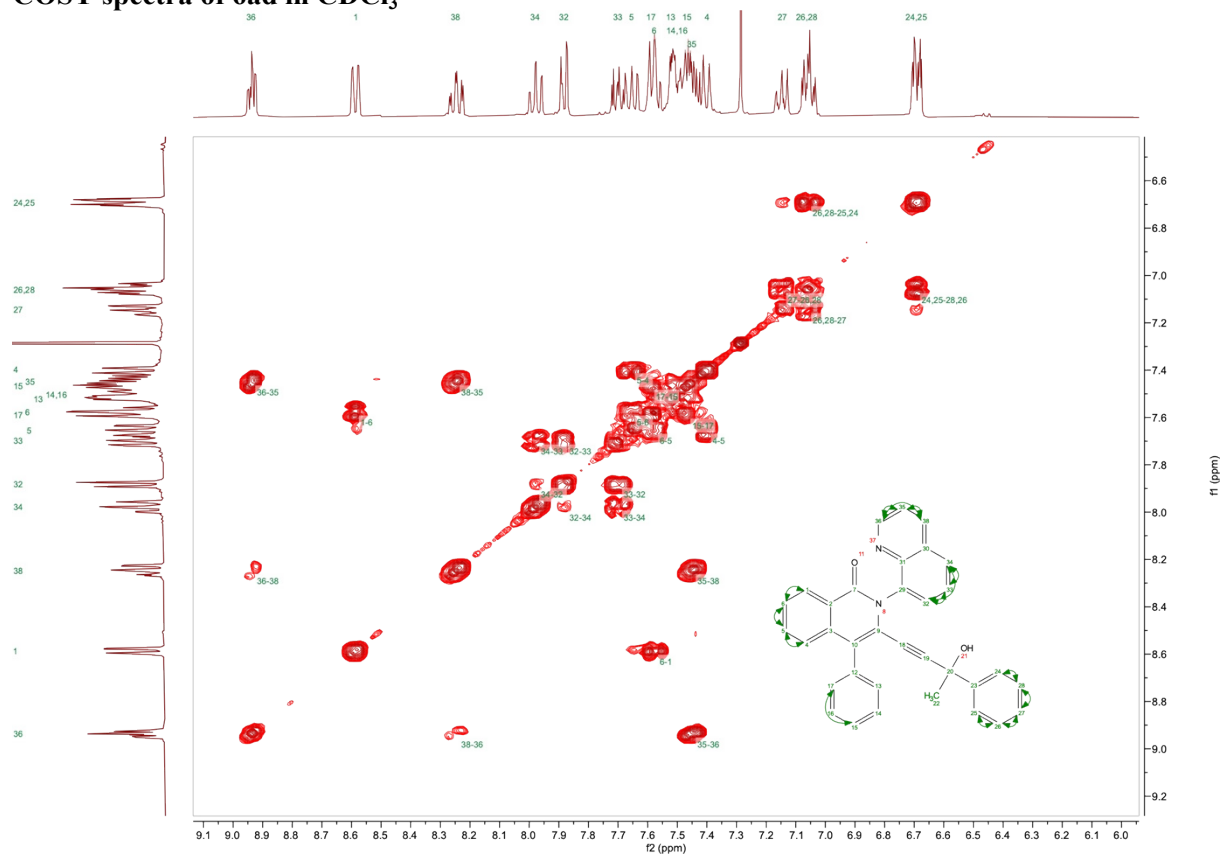

### NOESY spectra of 6ad in CDCl<sub>3</sub>

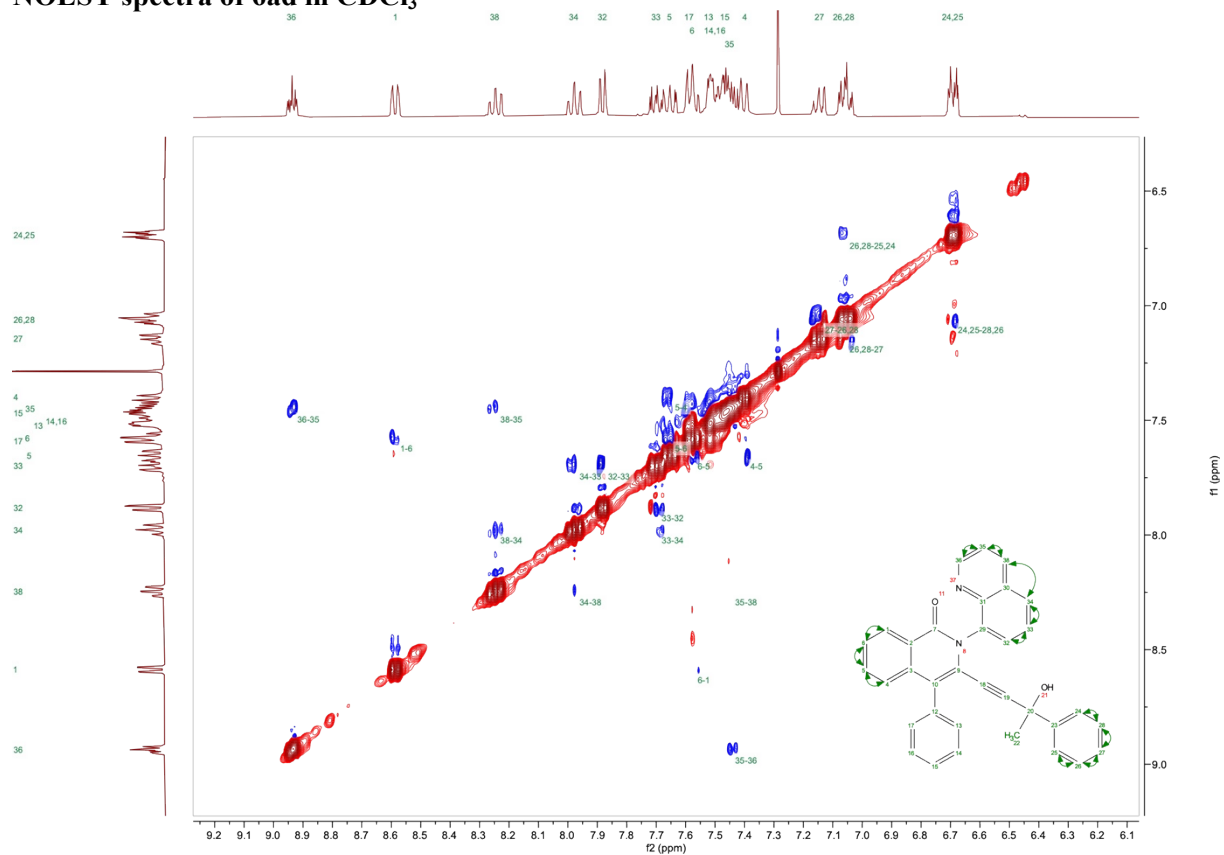

## HRMS spectra of 6ad

MeOH (H<sub>2</sub>O + Na), CV40

230110\_HRMS\_KS\_6ad\_Pos 51 (0.879)AM2 (Ar,22500.0,556.28,0.00); Cm (2:116)

TOF MS ES+  
6.55e7

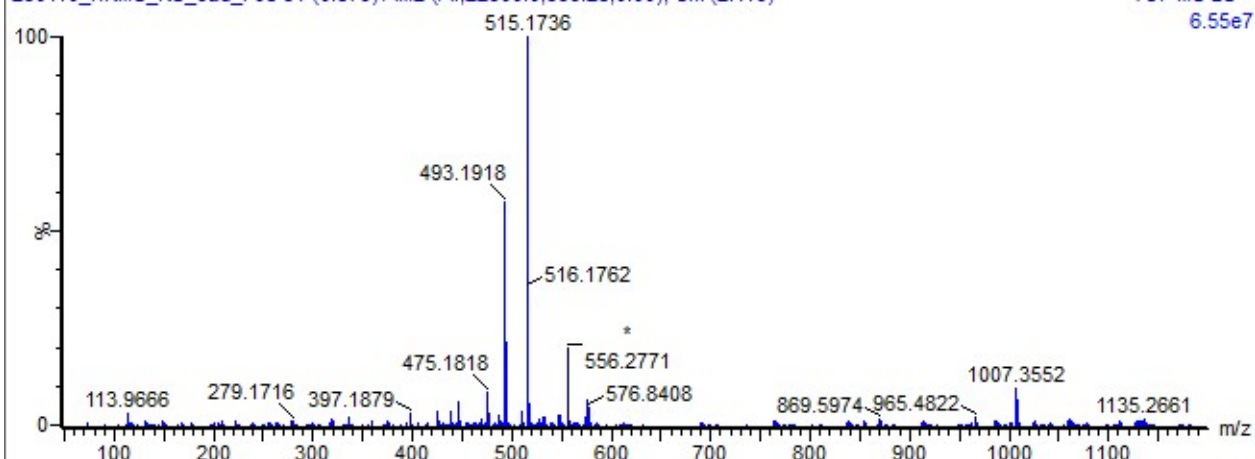

### Single Mass Analysis

Tolerance = 2.0 mDa / DBE: min = -1.5, max = 100.0

Element prediction: Off

Number of isotope peaks used for i-FIT = 2

Monoisotopic Mass, Even Electron Ions

108 formula(e) evaluated with 1 results within limits (all results (up to 1000) for each mass)

Elements Used:

C: 1-40      H: 1-40      N: 1-4      O: 1-4      Na: 0-1

| Mass     | Calc. Mass | mDa | PPM | DBE  | Formula                                                       | i... | i..     | Fit Conf % | C  | H  | N | O | Na |
|----------|------------|-----|-----|------|---------------------------------------------------------------|------|---------|------------|----|----|---|---|----|
| 493.1918 | 493.1916   | 0.2 | 0.4 | 23.5 | C <sub>34</sub> H <sub>25</sub> N <sub>2</sub> O <sub>2</sub> | 3... | n...n/a |            | 34 | 25 | 2 | 2 |    |

MeOH (H<sub>2</sub>O + Na), CV40

230110\_HRMS\_KS\_6ad\_Pos 51 (0.879)AM2 (Ar,22500.0,556.28,0.00); Cm (2:116)

TOF MS ES+  
3.78e+007

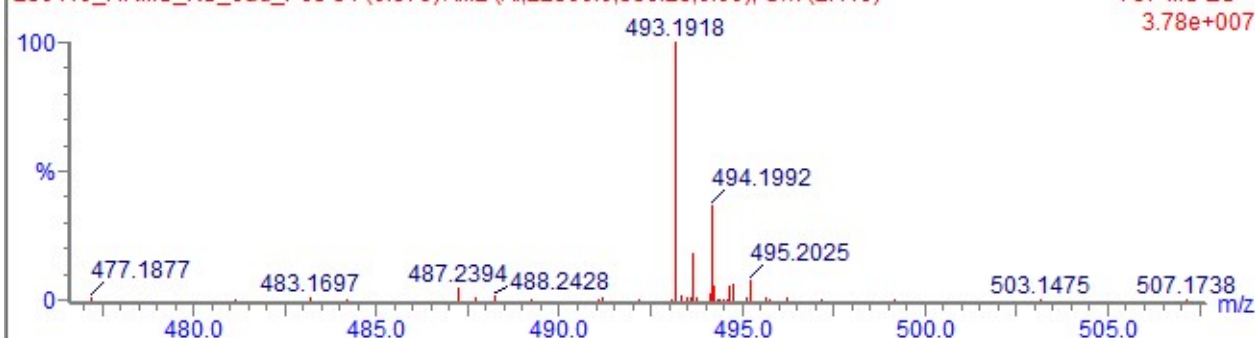

# Minor isomers

7

## <sup>1</sup>H spectra of 7 in MeOD

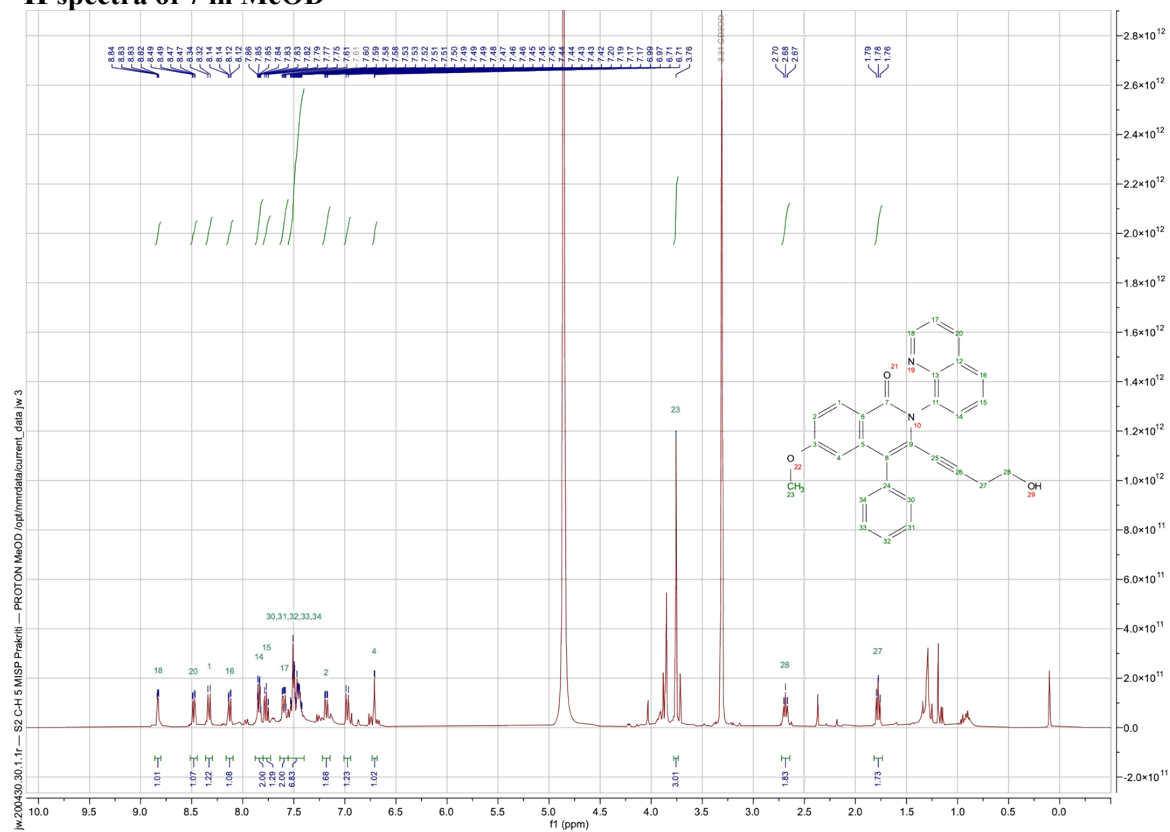

## <sup>13</sup>C spectra of 7 in MeOD

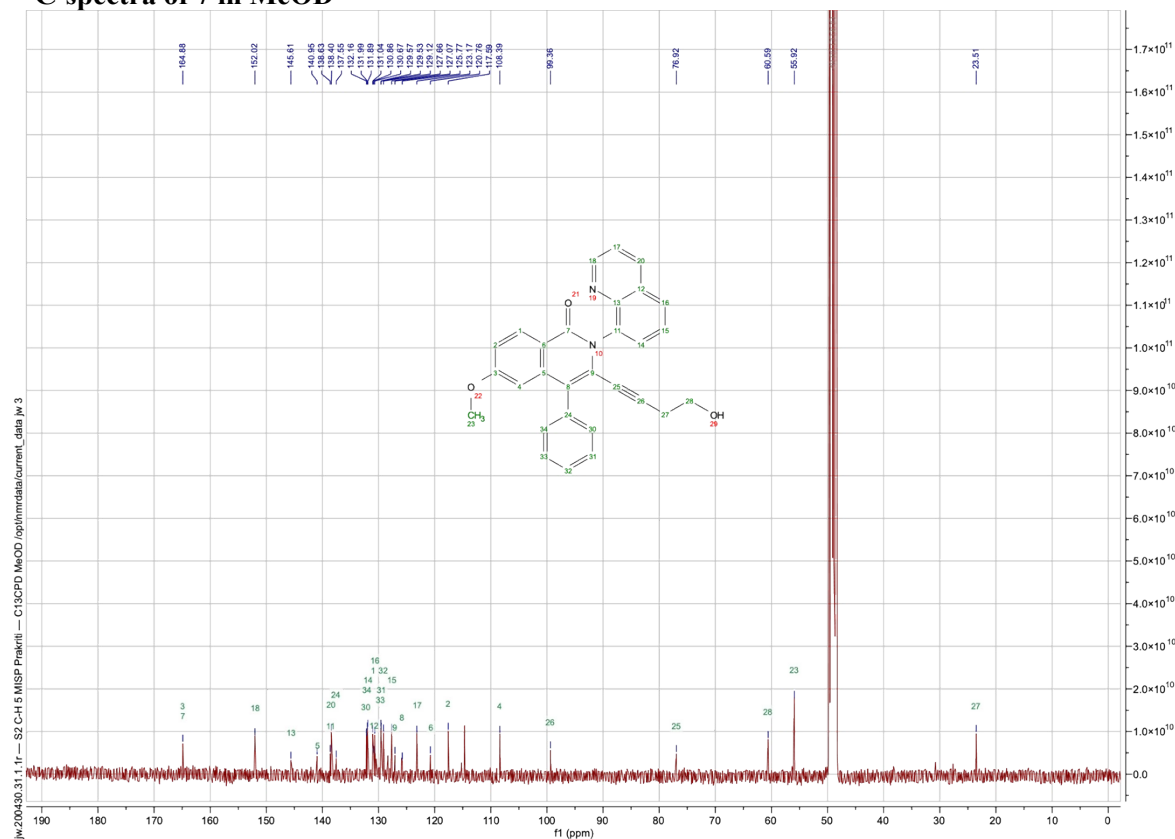

### HSQC spectra of 7 in MeOD

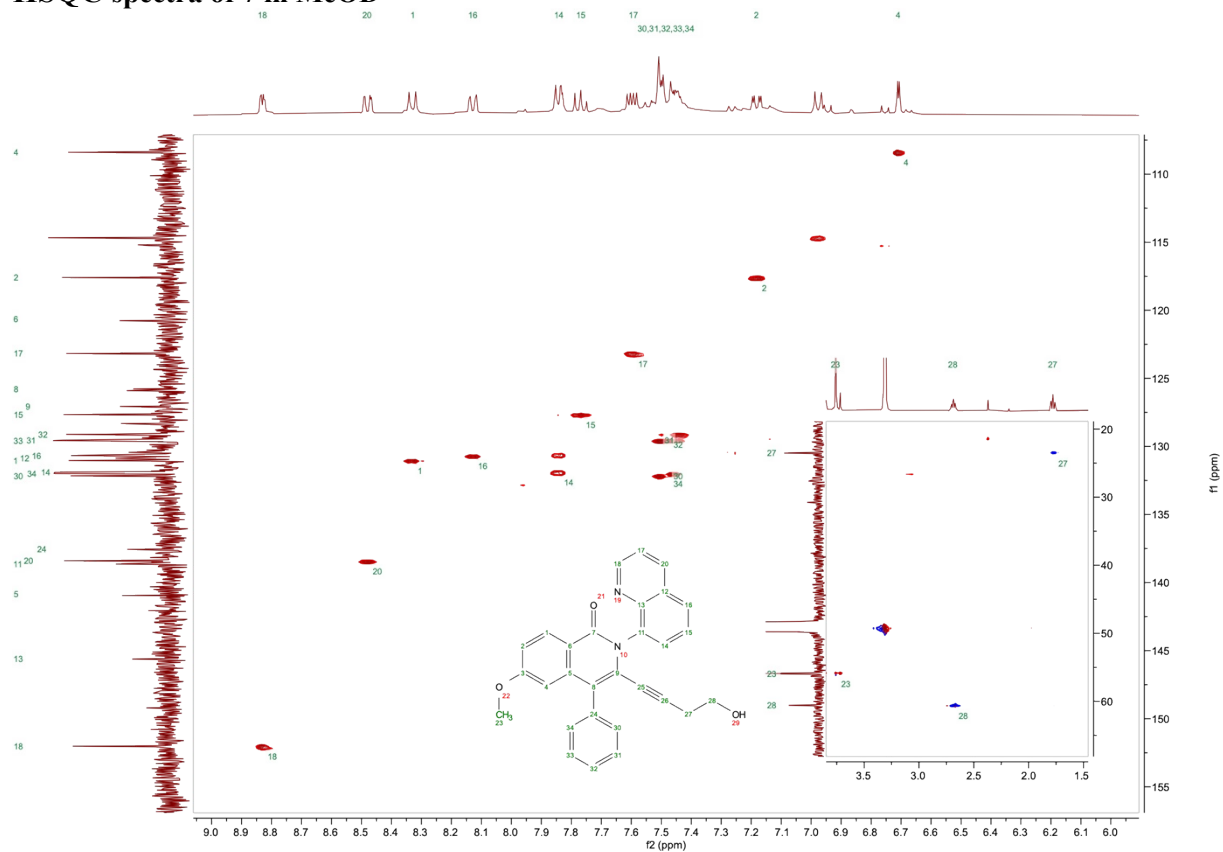

### HMBC spectra of 7 in MeOD

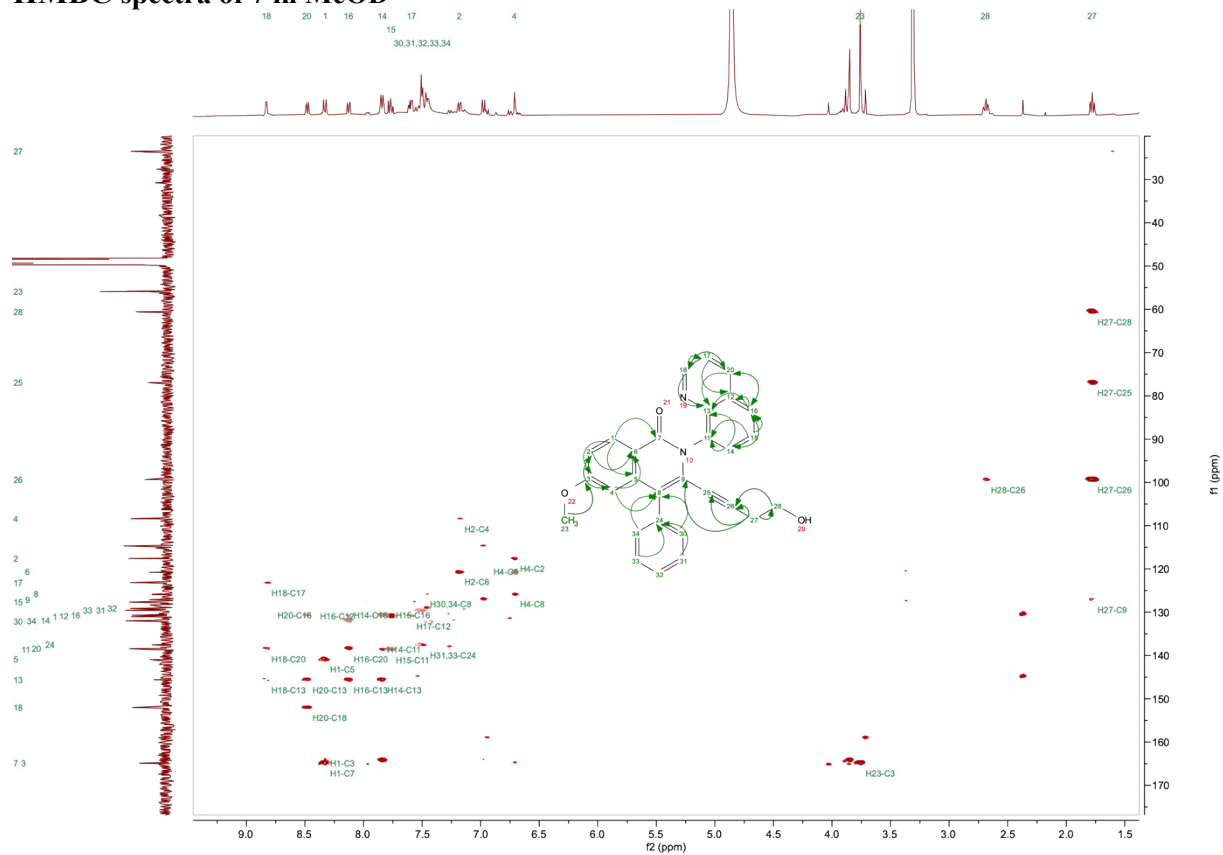

# COSY spectra of 7 in MeOD

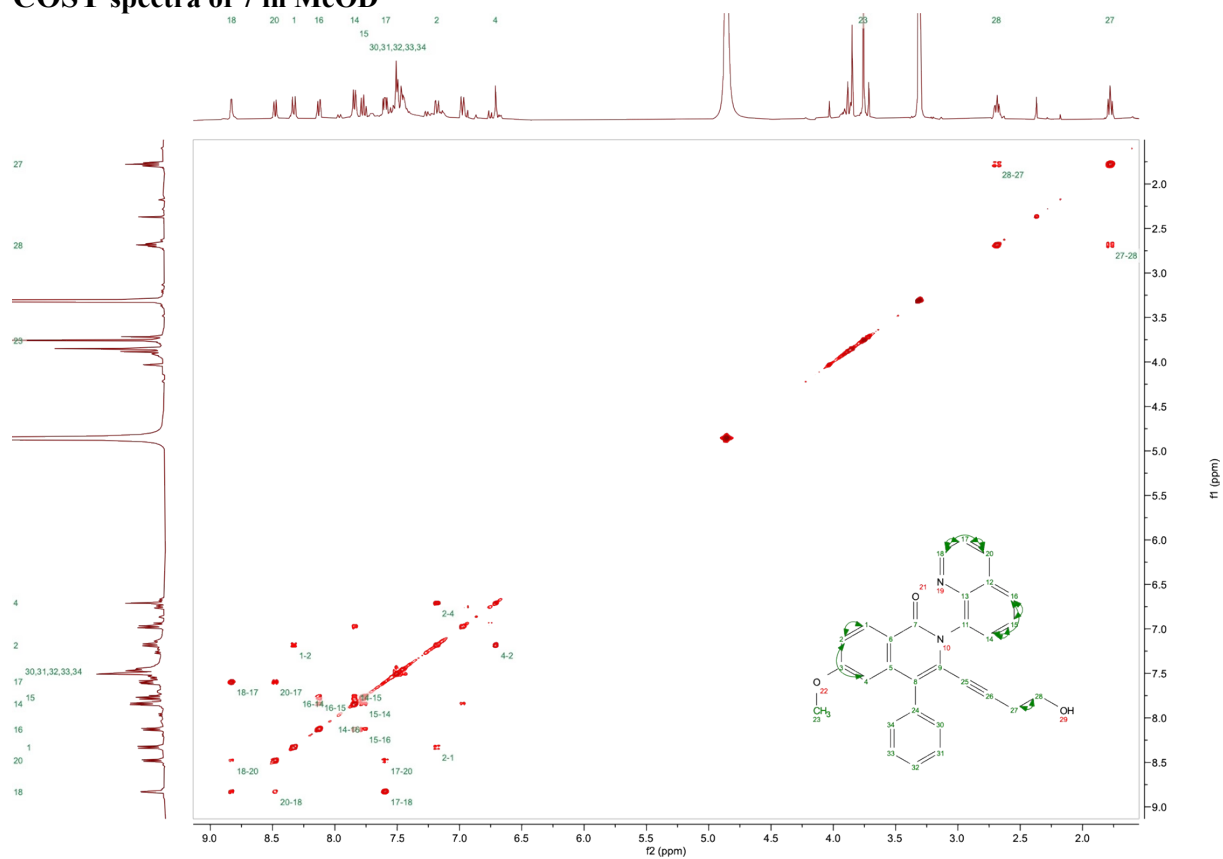

## HRMS spectra of 7

MeOH (H2O, FA), CV 30

220514\_Linne\_KS-S2-C-H5-MISP 81 (1.386) AM2 (Ar,22500.0,556.28,0.00); Cm (7:117)

TOF MS ES+  
1.57e7

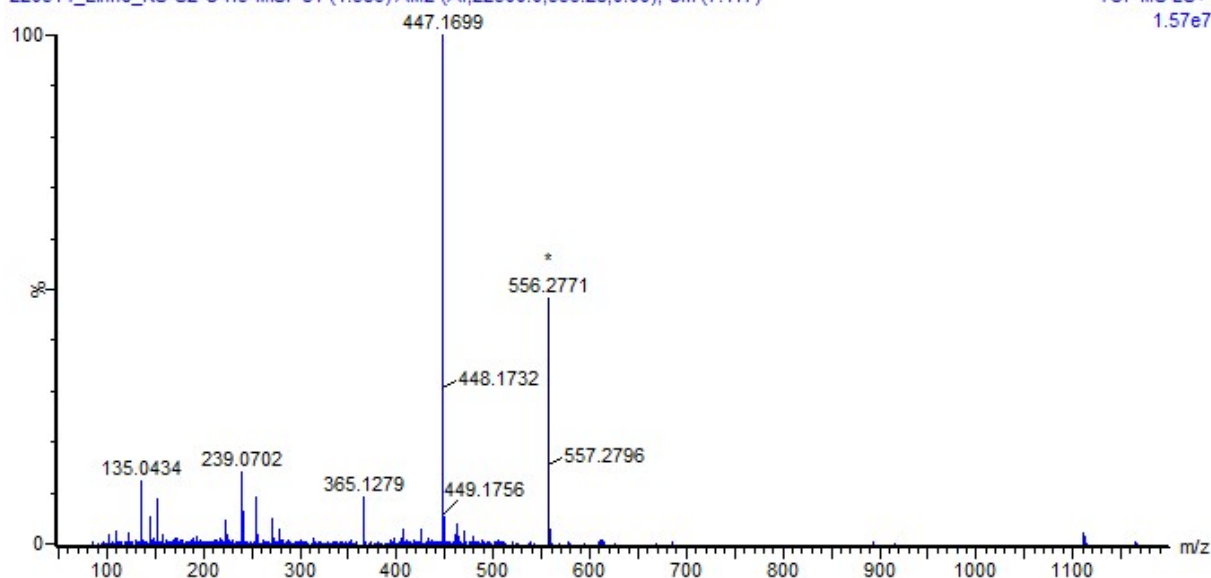

### Single Mass Analysis

Tolerance = 2.0 mDa / DBE: min = -1.5, max = 100.0

Element prediction: Off

Number of isotope peaks used for i-FIT = 2

Monoisotopic Mass, Even Electron Ions

662 formula(e) evaluated with 2 results within limits (all results (up to 1000) for each mass)

Elements Used:

C: 0-70      H: 0-120      N: 0-5      O: 0-5      S: 0-1      I: 0-1

| Mass     | Calc. Ma... | mDa  | PPM  | DBE  | Formula         | i... | Fit Conf % | C  | H  | N | O | S | I |
|----------|-------------|------|------|------|-----------------|------|------------|----|----|---|---|---|---|
| 447.1699 | 447.1702    | -0.3 | -0.7 | 10.5 | C21 H27 N4 O5 S | 1... | 22.88      | 21 | 27 | 4 | 5 | 1 |   |
|          | 447.1709    | -1.0 | -2.2 | 19.5 | C29 H23 N2 O3   | 1... | 77.12      | 29 | 23 | 2 | 3 |   |   |

MeOH (H2O, FA), CV 30

220514\_Linne\_KS-S2-C-H5-MISP 81 (1.386) AM2 (Ar,22500.0,556.28,0.00); Cm (7:117)

TOF MS ES+  
1.57e+007

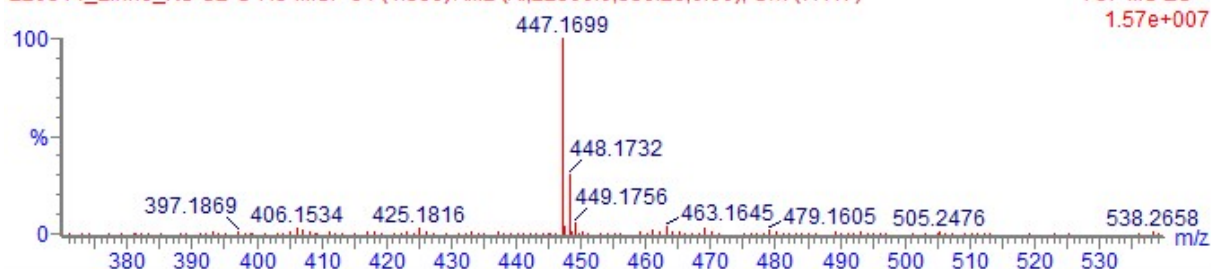

**<sup>1</sup>H spectra of 8 in CDCl<sub>3</sub>**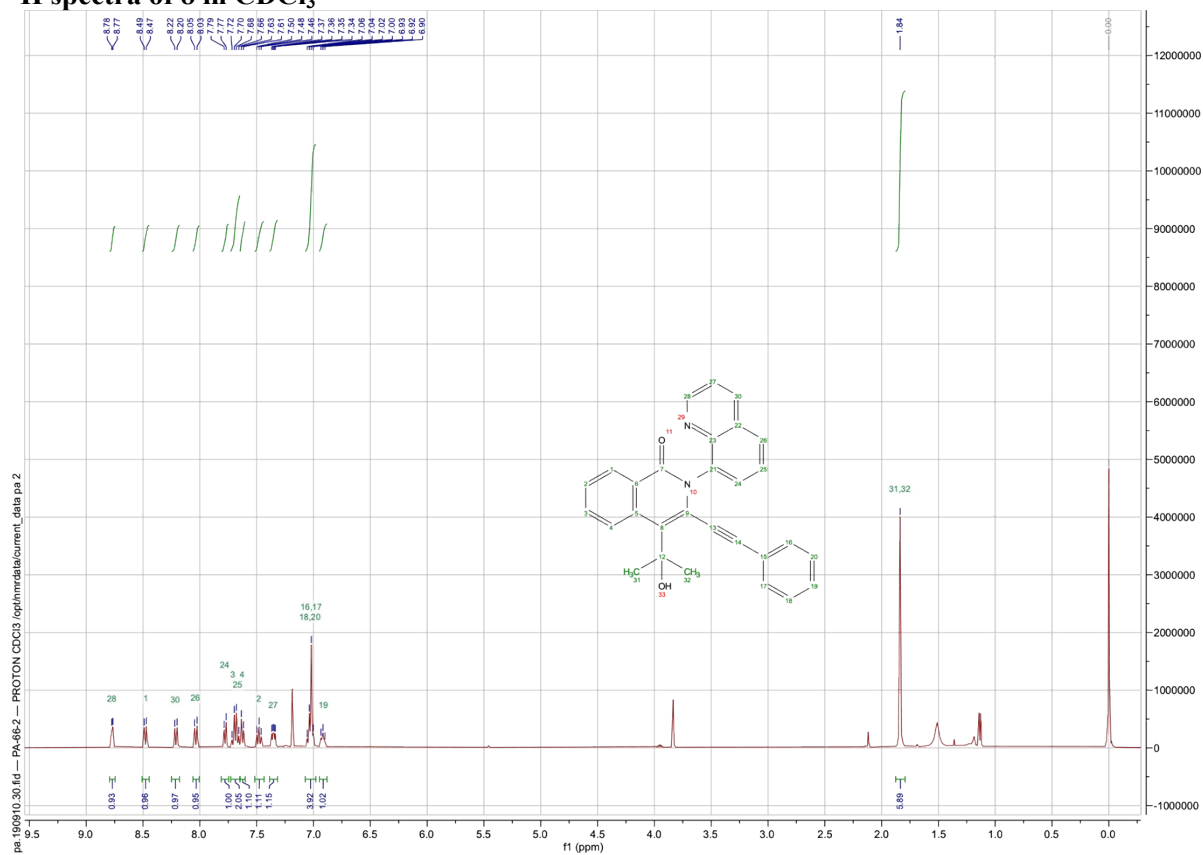**<sup>13</sup>C spectra of 8 in CDCl<sub>3</sub>**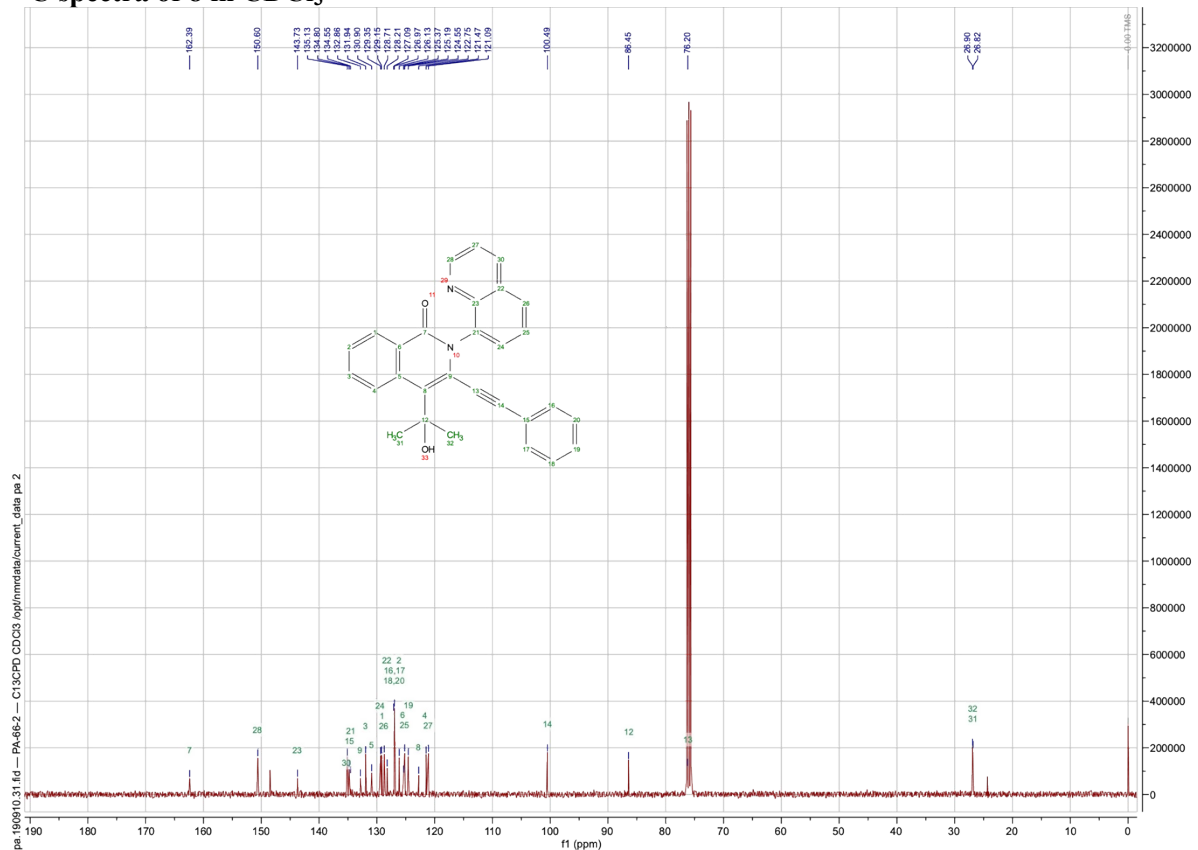

### HSQC spectra of 8 in CDCl<sub>3</sub>

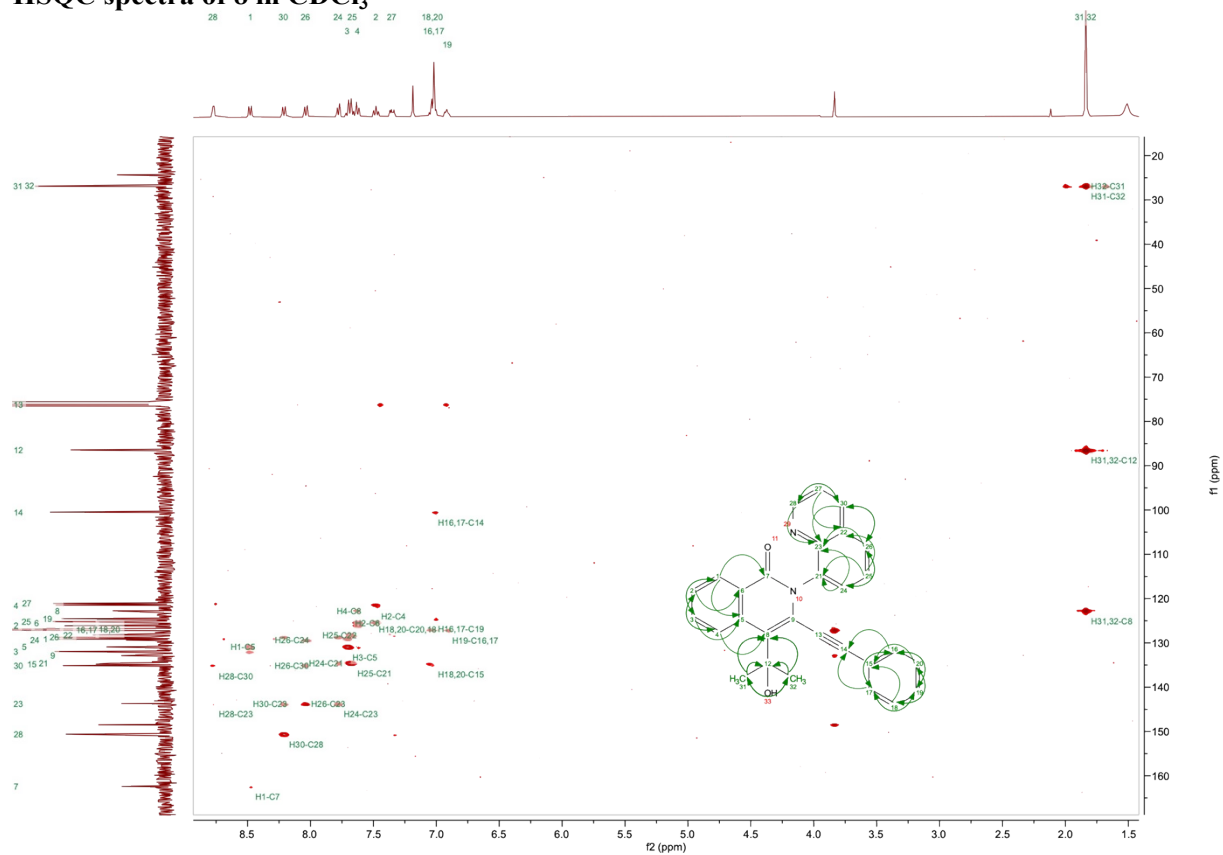

### HMBC spectra of 8 in CDCl<sub>3</sub>

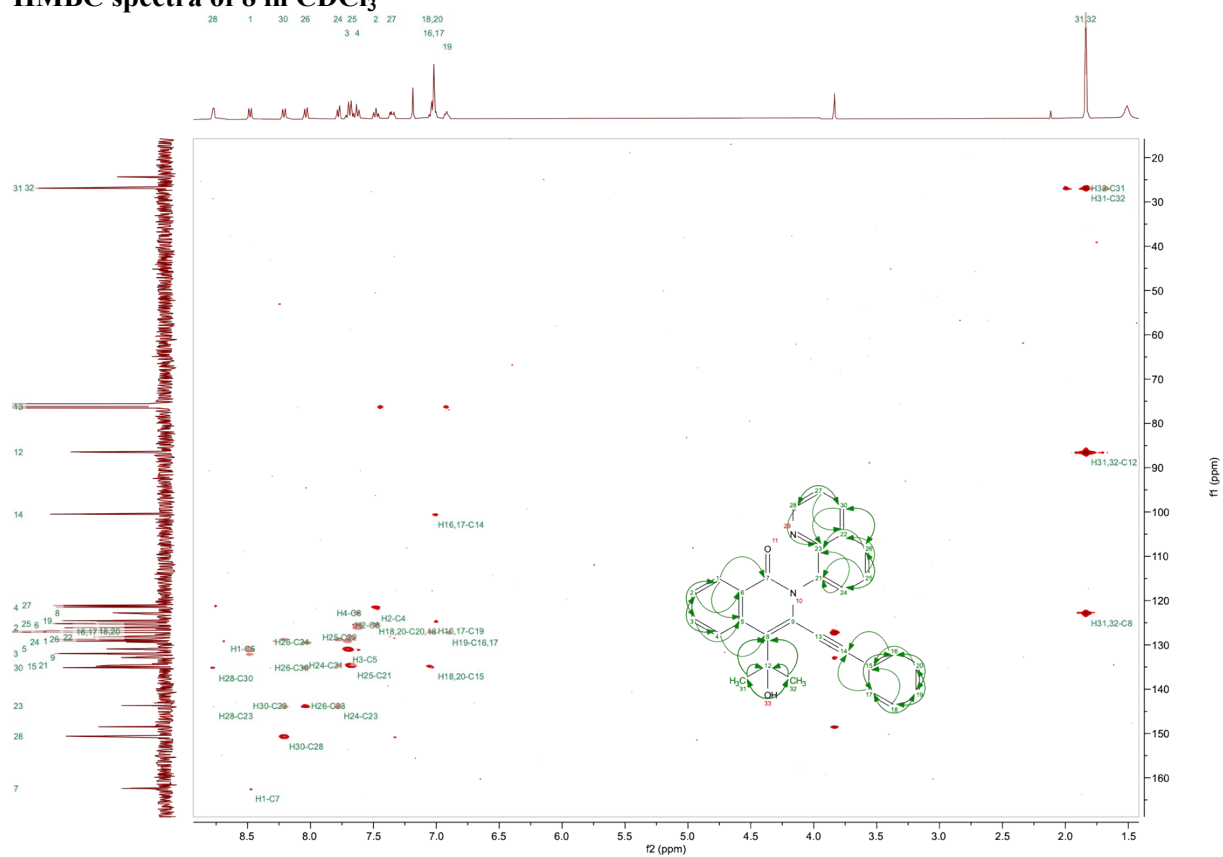



### COSY spectra of 8 in CDCl<sub>3</sub>

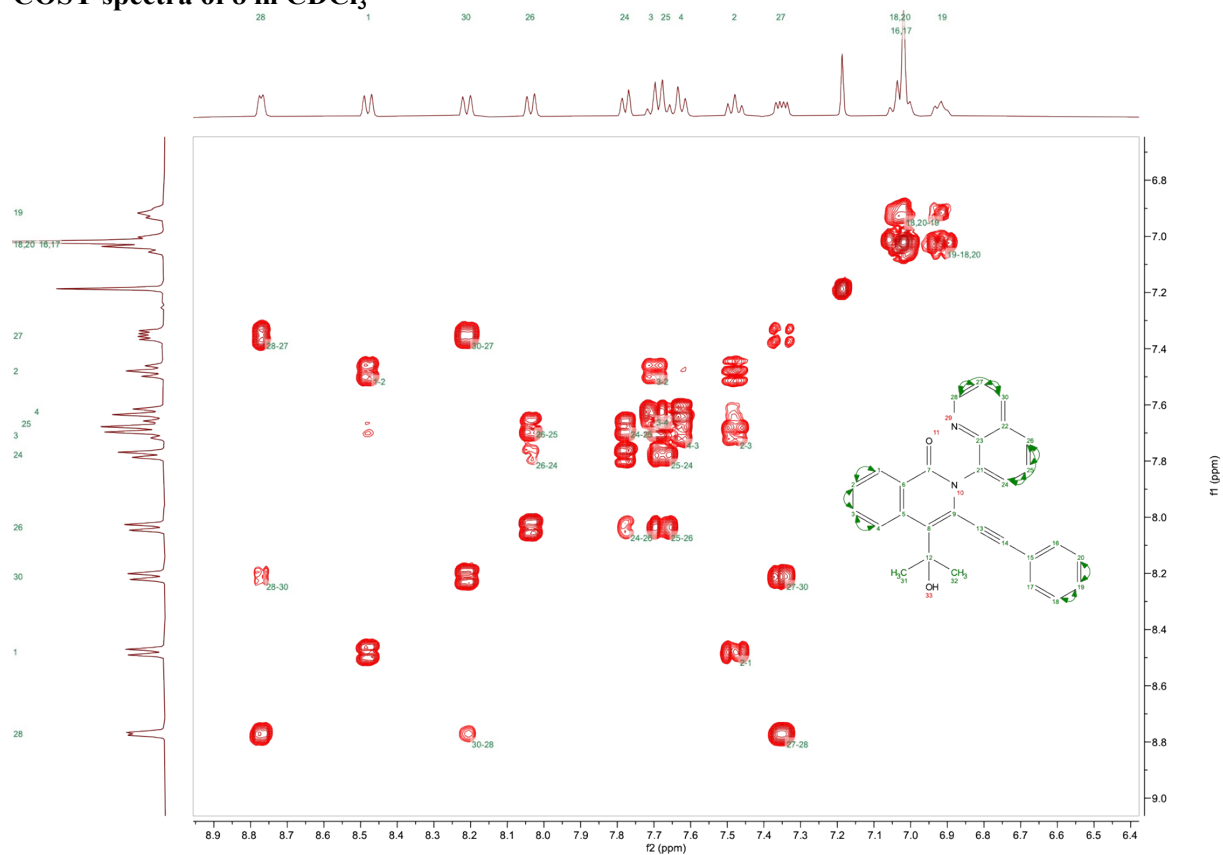

### NOESY spectra of 8 in CDCl<sub>3</sub>

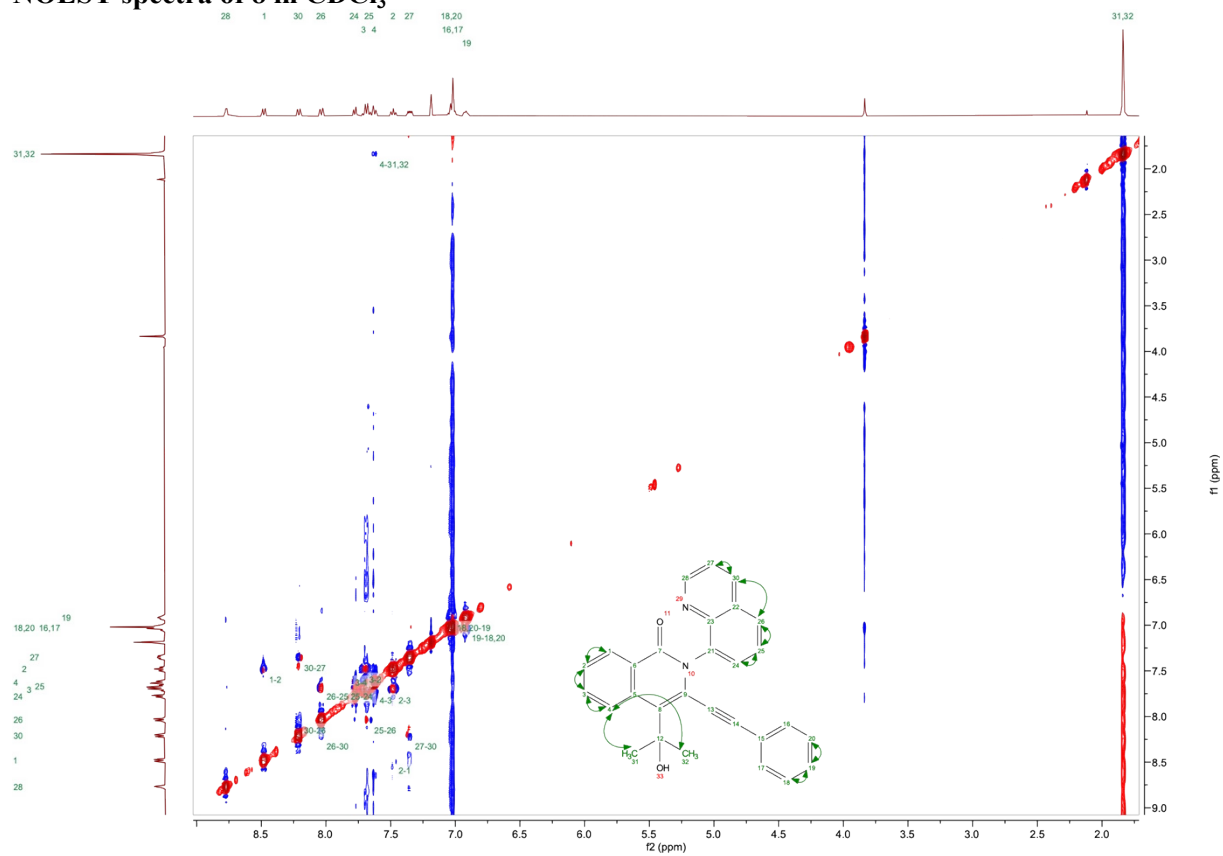

## HRMS spectra of 8

MEOH (2% H<sub>2</sub>O, 0.1% FA), CV35

210316\_HRMS\_IN\_KS\_PA-66-2 108 (1.843) AM2 (Ar,22500.0,556.28,0.00); Cm (1:117)

TOF MS ES+  
1.05e7

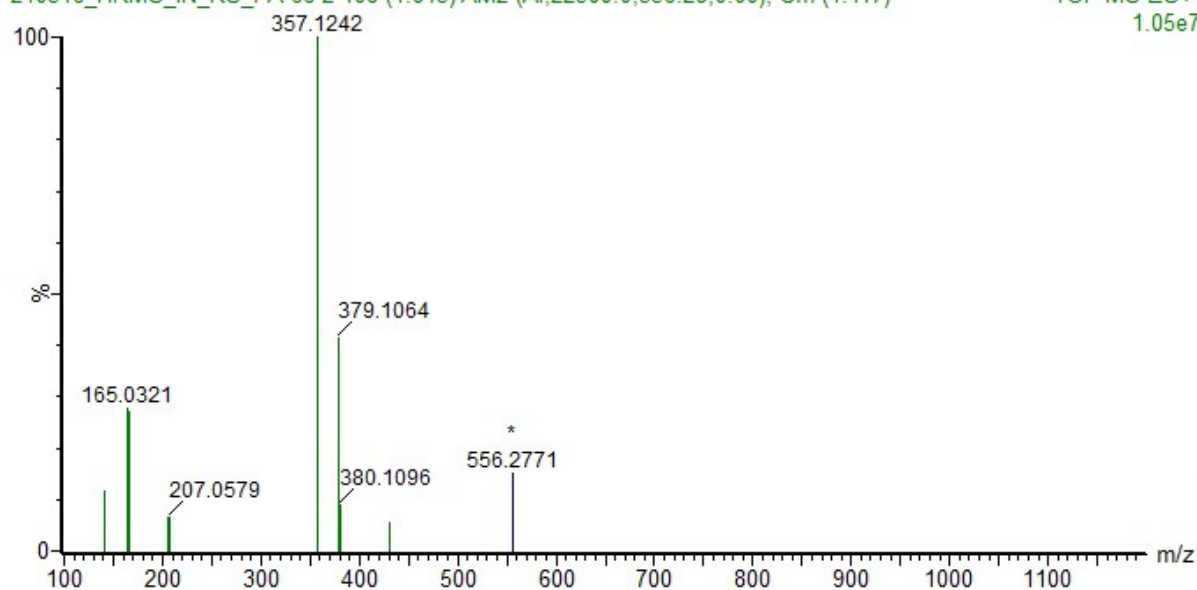

### Single Mass Analysis

Tolerance = 2.0 mDa / DBE: min = -0.5, max = 100.0

Element prediction: Off

Number of isotope peaks used for i-FIT = 3

Monoisotopic Mass, Even Electron Ions

266 formula(e) evaluated with 3 results within limits (all results (up to 1000) for each mass)

Elements Used:

| Mass     | Calc. Mass | mDa  | PPM  | DBE  | Formula                                                            | Fit Conf % | C  | H  | N | O | Na | S |
|----------|------------|------|------|------|--------------------------------------------------------------------|------------|----|----|---|---|----|---|
| 357.1242 | 357.1239   | 0.3  | 0.8  | 15.5 | C <sub>22</sub> H <sub>17</sub> N <sub>2</sub> O <sub>3</sub>      | 4..63.30   | 22 | 17 | 2 | 3 |    |   |
|          | 357.1249   | -0.7 | -2.0 | 7.5  | C <sub>17</sub> H <sub>22</sub> N <sub>2</sub> O <sub>3</sub> Na S | 4..22.77   | 17 | 22 | 2 | 3 | 1  | 1 |
|          | 357.1255   | -1.3 | -3.6 | 16.5 | C <sub>25</sub> H <sub>18</sub> O Na                               | 4..13.93   | 25 | 18 |   | 1 | 1  |   |

MEOH (2% H<sub>2</sub>O, 0.1% FA), CV35

210316\_HRMS\_IN\_KS\_PA-66-2 108 (1.843) AM2 (Ar,22500.0,556.28,0.00); Cm (1:117)

TOF MS ES+  
1.05e+007

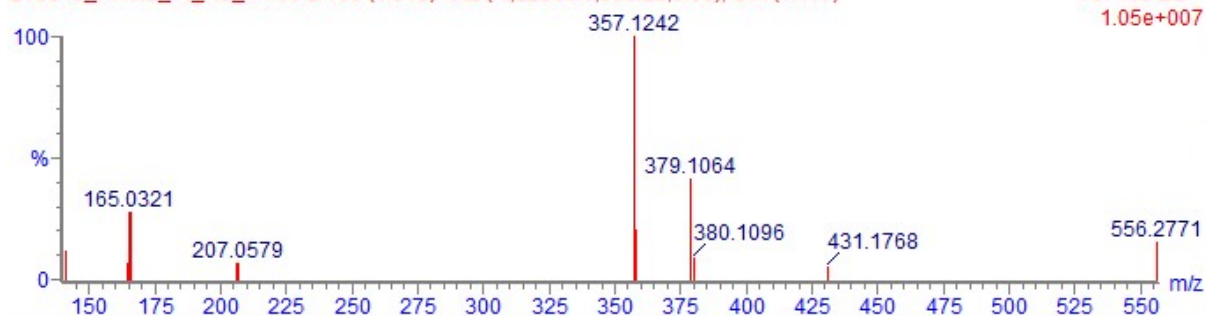

<sup>1</sup>H spectra of 9 in CDCl<sub>3</sub>

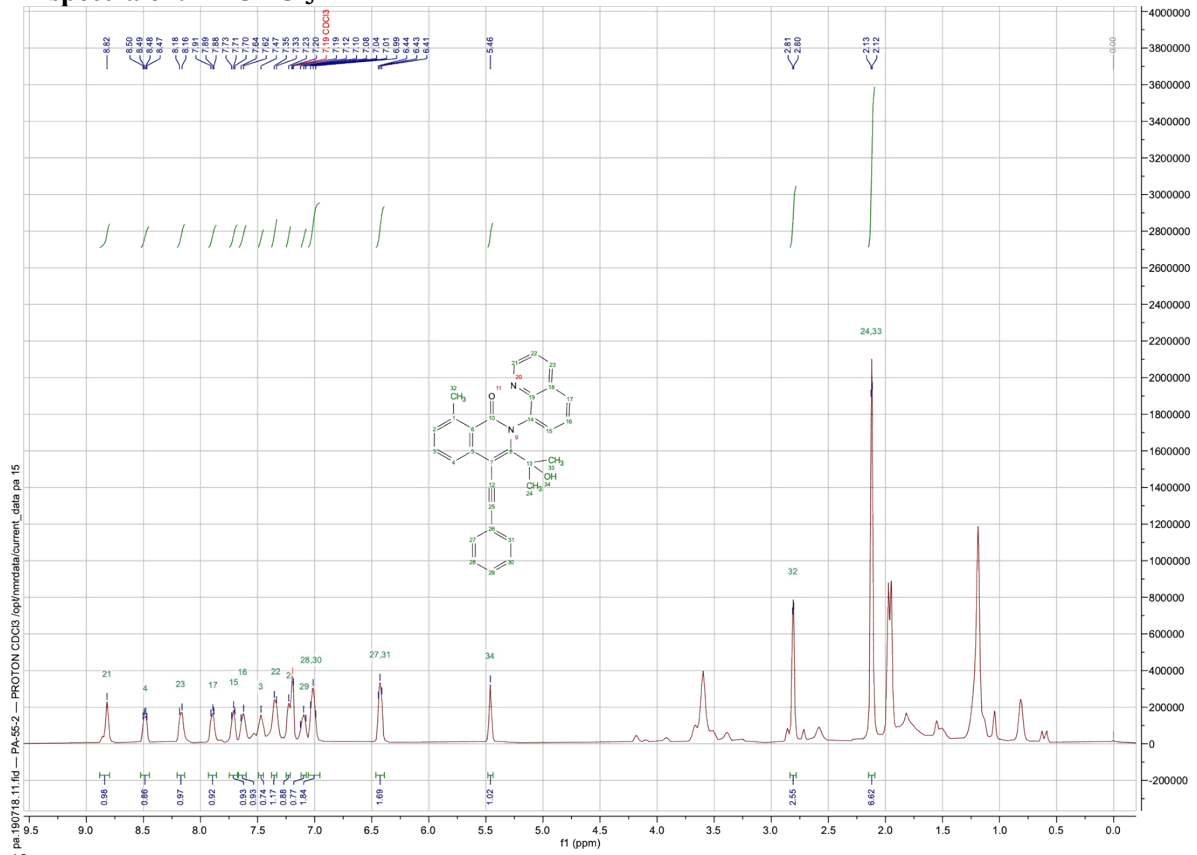

<sup>13</sup>C spectra of 9 in CDCl<sub>3</sub>

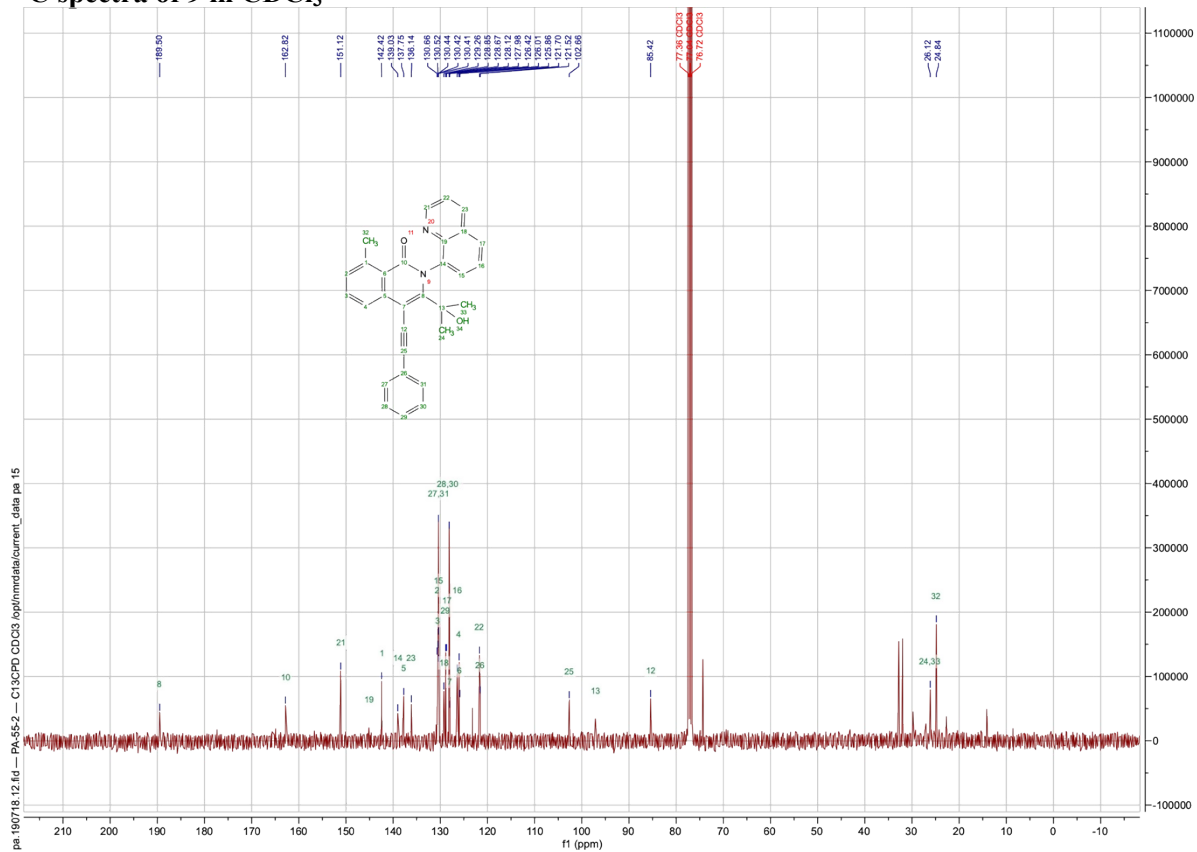

### HSQC spectra of 9 in CDCl<sub>3</sub>

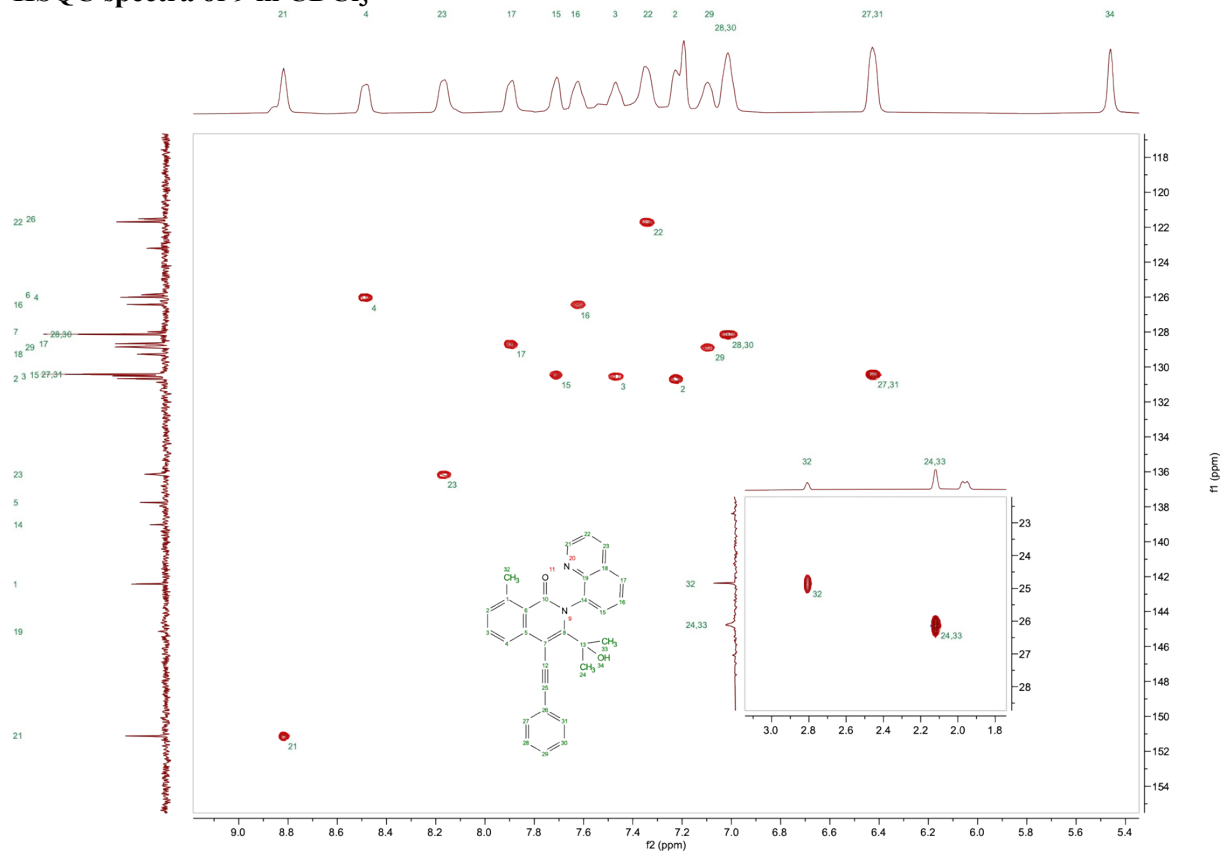

### HMBC spectra of 9 in CDCl<sub>3</sub>

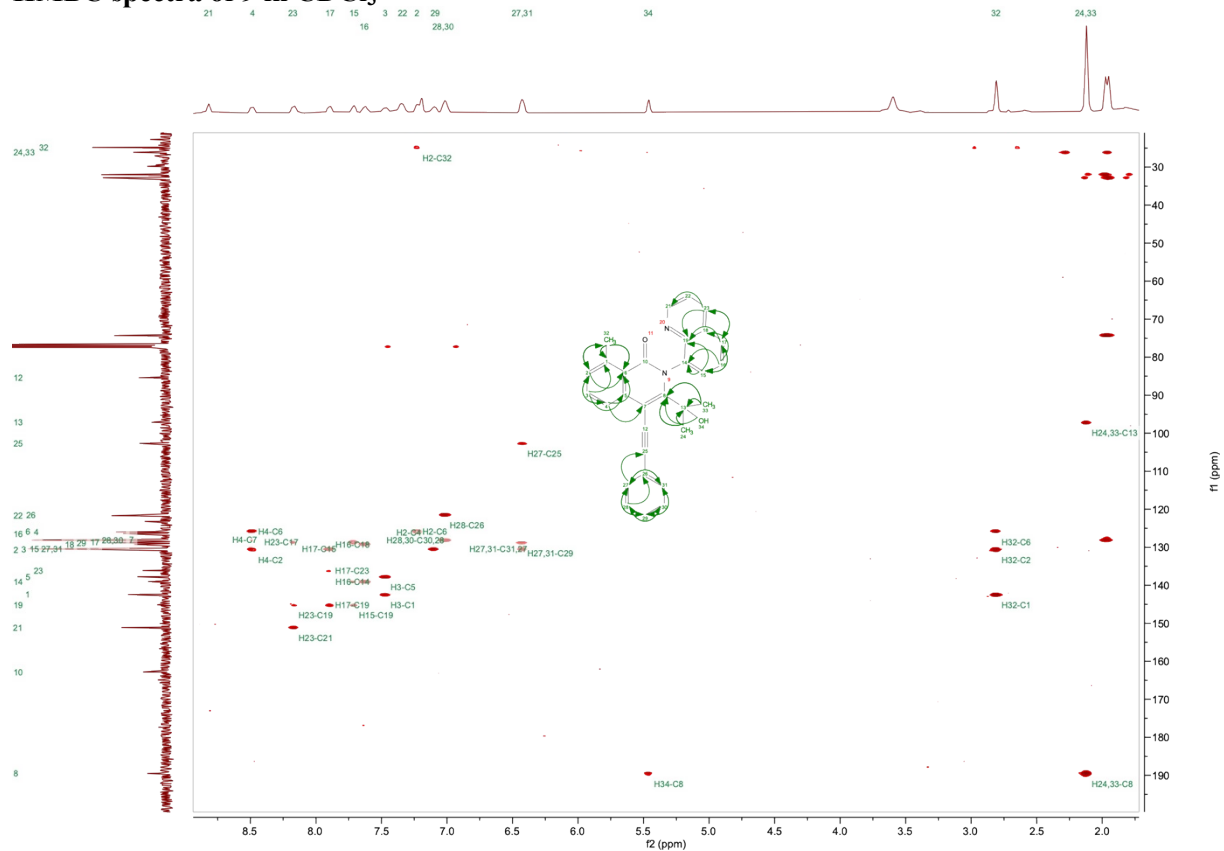

**COSY spectra of 9 in CDCl<sub>3</sub>**

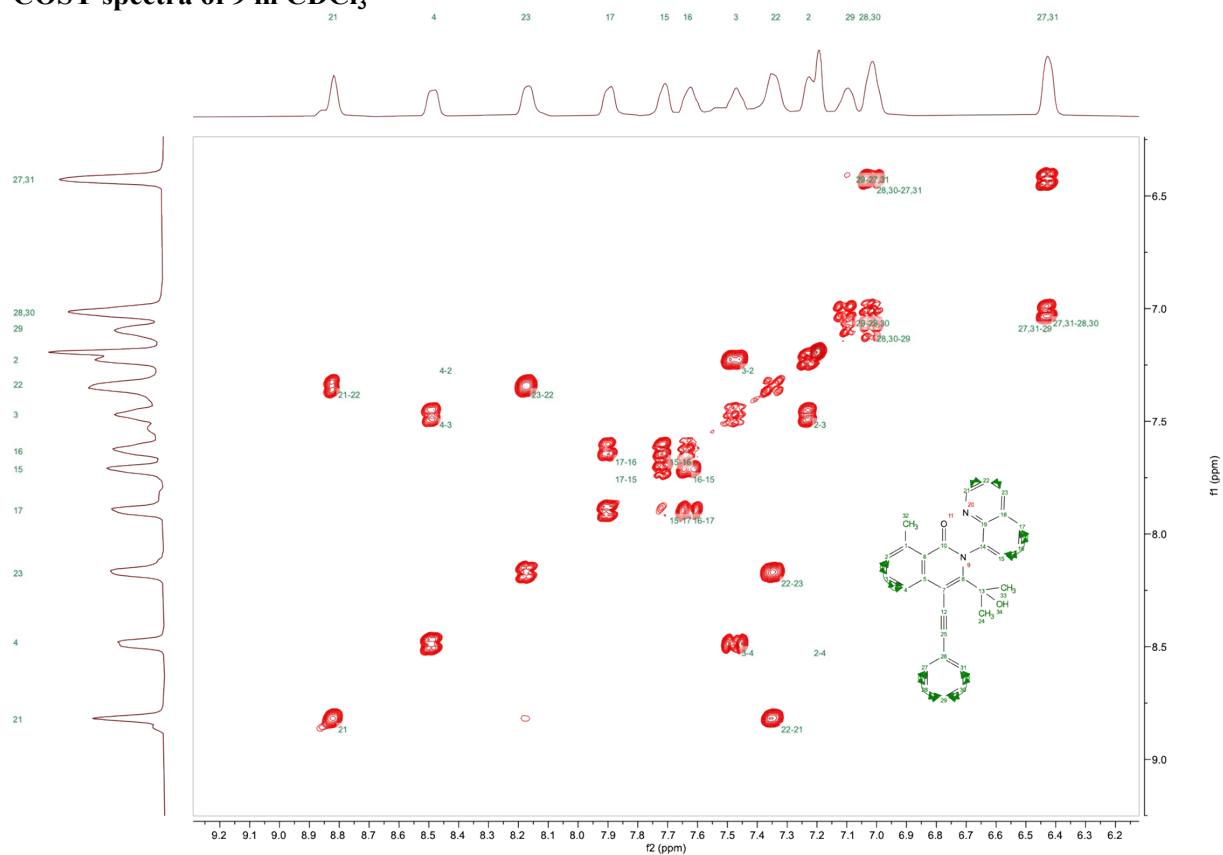

**NOESY spectra of 9 in CDCl<sub>3</sub>**

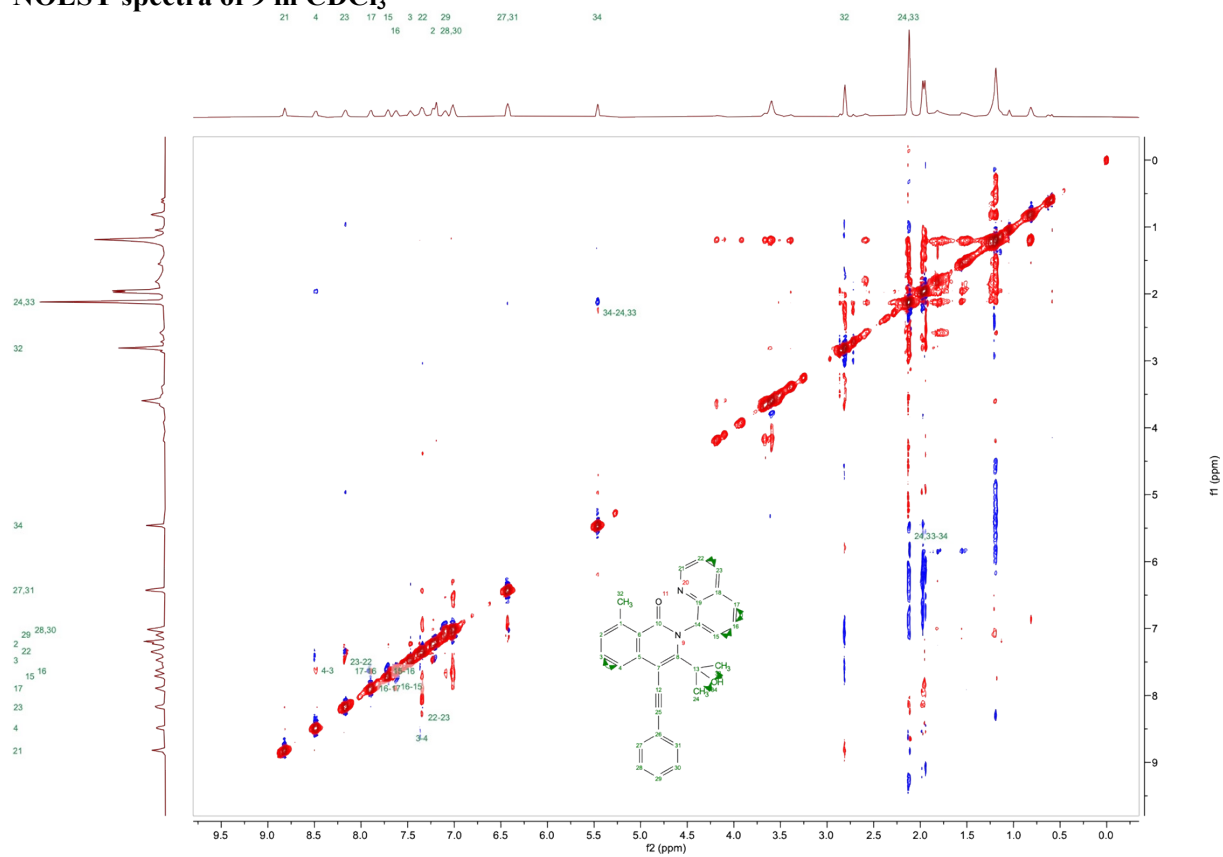

# HRMS spectra of 9

## HRMS DST-FIST Funded, Department of Chemistry, IIT Madras

### ESI Mass Report

|                      |                       |                           |                                                     |
|----------------------|-----------------------|---------------------------|-----------------------------------------------------|
| <b>Name</b>          | 071119-24-KRR-PA-55-2 | <b>Data File Path</b>     | D:\MassHunter\Data\2019\NOV-2019\KRR\PA-55-2.d      |
| <b>Sample ID</b>     |                       | <b>Acq. Time (Local)</b>  | 27-11-2019 13:58:16 (UTC+05:30)                     |
| <b>Instrument</b>    | Instrument 1          | <b>Method Path (Acq)</b>  | D:\MassHunter\Methods\Direct Infusion_HPLC.m        |
| <b>MS Type</b>       | QTOF                  | <b>Version (Acq SW)</b>   | 6200 series TOF/6500 series Q-TOF B.08.00 (B8058.0) |
| <b>Inj. Vol (ul)</b> | 5                     | <b>IRM Status</b>         | Success                                             |
| <b>Position</b>      | P1-C2                 | <b>Method Path (DA)</b>   | D:\MassHunter\Methods\10.0\Default.m                |
| <b>Plate Pos.</b>    |                       | <b>Target Source Path</b> |                                                     |
| <b>Operator</b>      |                       | <b>Result Summary</b>     | 1 qualified (1 targets)                             |

### Compound Details

**Cpd. 1: C30 H24 N2 O2**

Compound Spectra (overlaid)

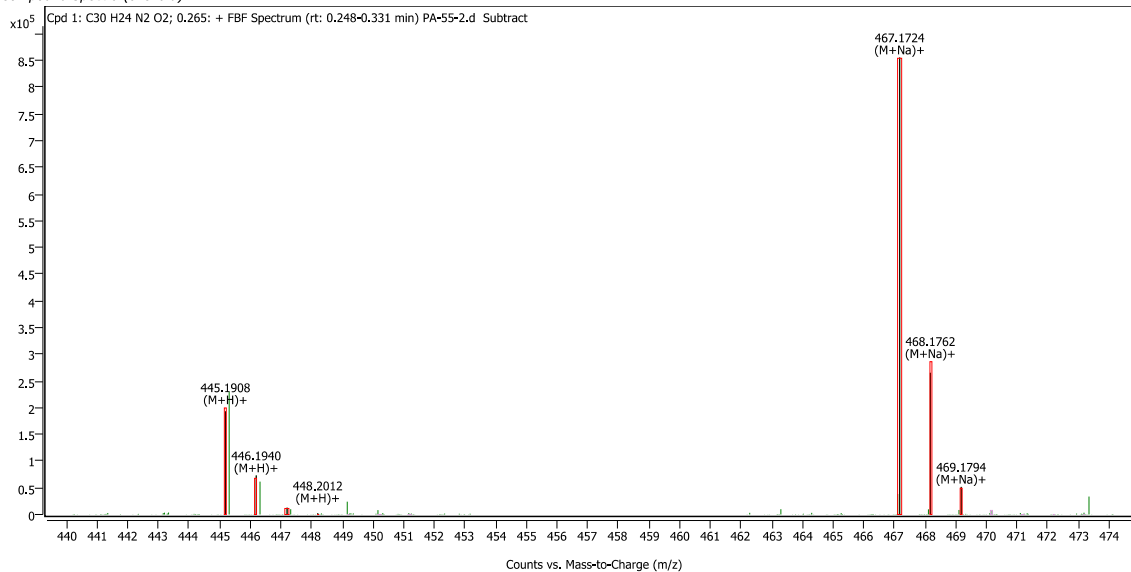

Compound ID Table

| Cpd | Formula       | Mass (Tgt) | Calc. Mass | Mass     | Species | Diff(Tgt.ppm) | mDa   |
|-----|---------------|------------|------------|----------|---------|---------------|-------|
| 1   | C30 H24 N2 O2 | 444.1838   | 444.1834   | 445.1908 | (M+H)+  | -0.88         | -0.39 |
|     |               |            |            | 467.1724 | (M+Na)+ |               |       |

**Acylated side product**  
**<sup>1</sup>H spectra of 10 in CDCl<sub>3</sub>**

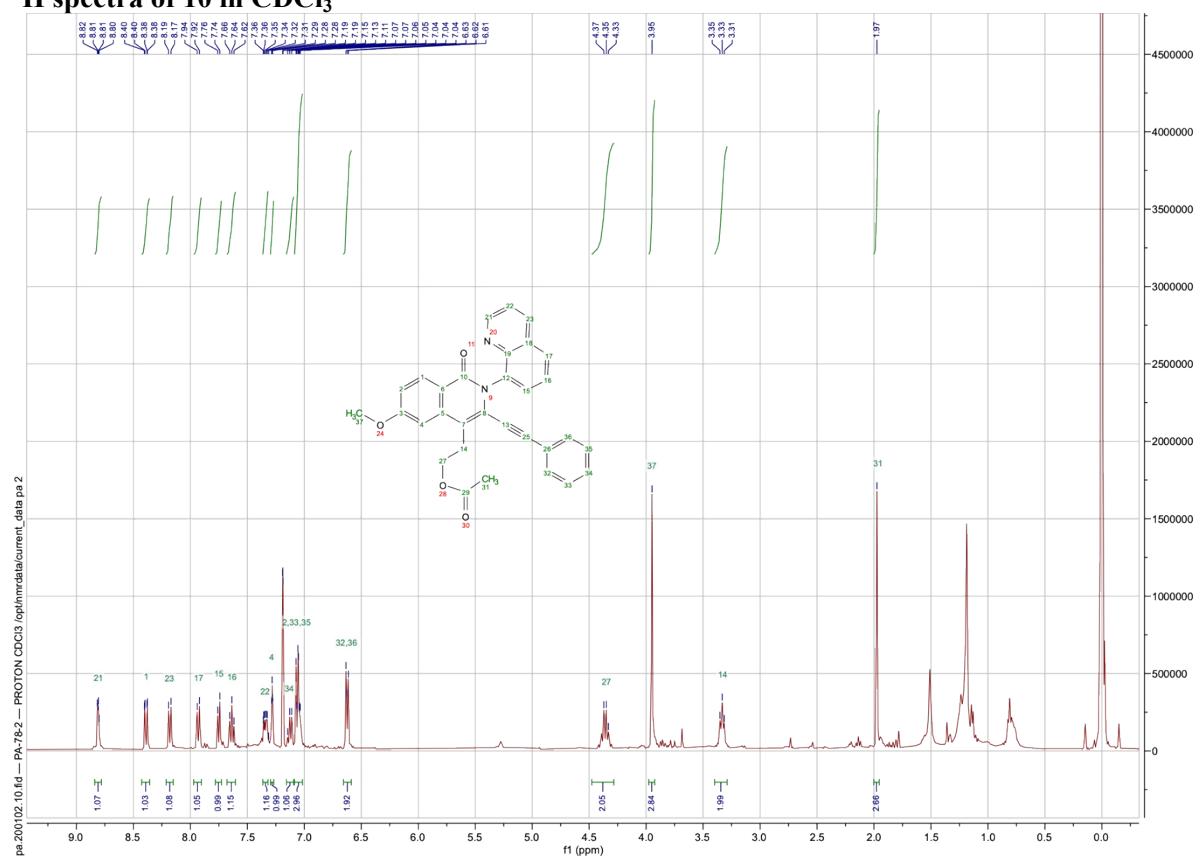

**<sup>13</sup>C spectra of 10 in CDCl<sub>3</sub>**

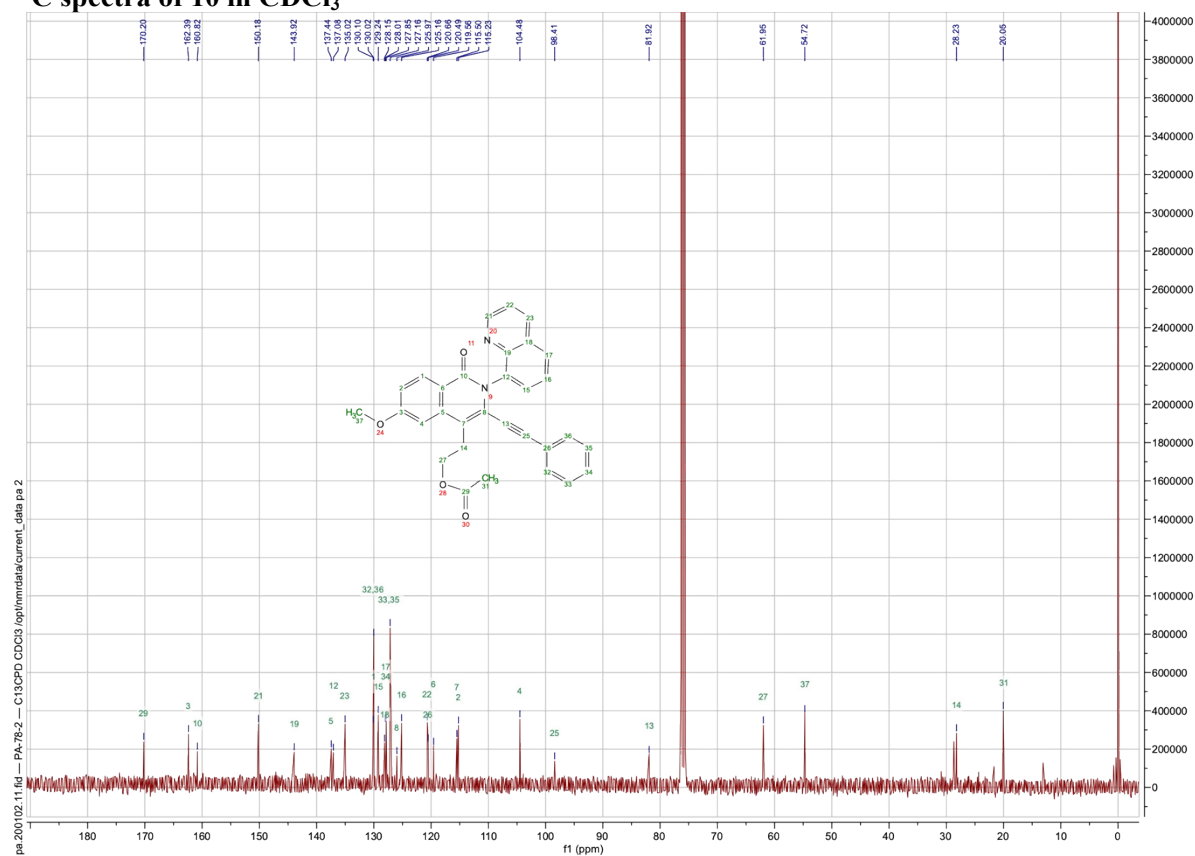

### HSQC spectra of 10 in CDCl<sub>3</sub>

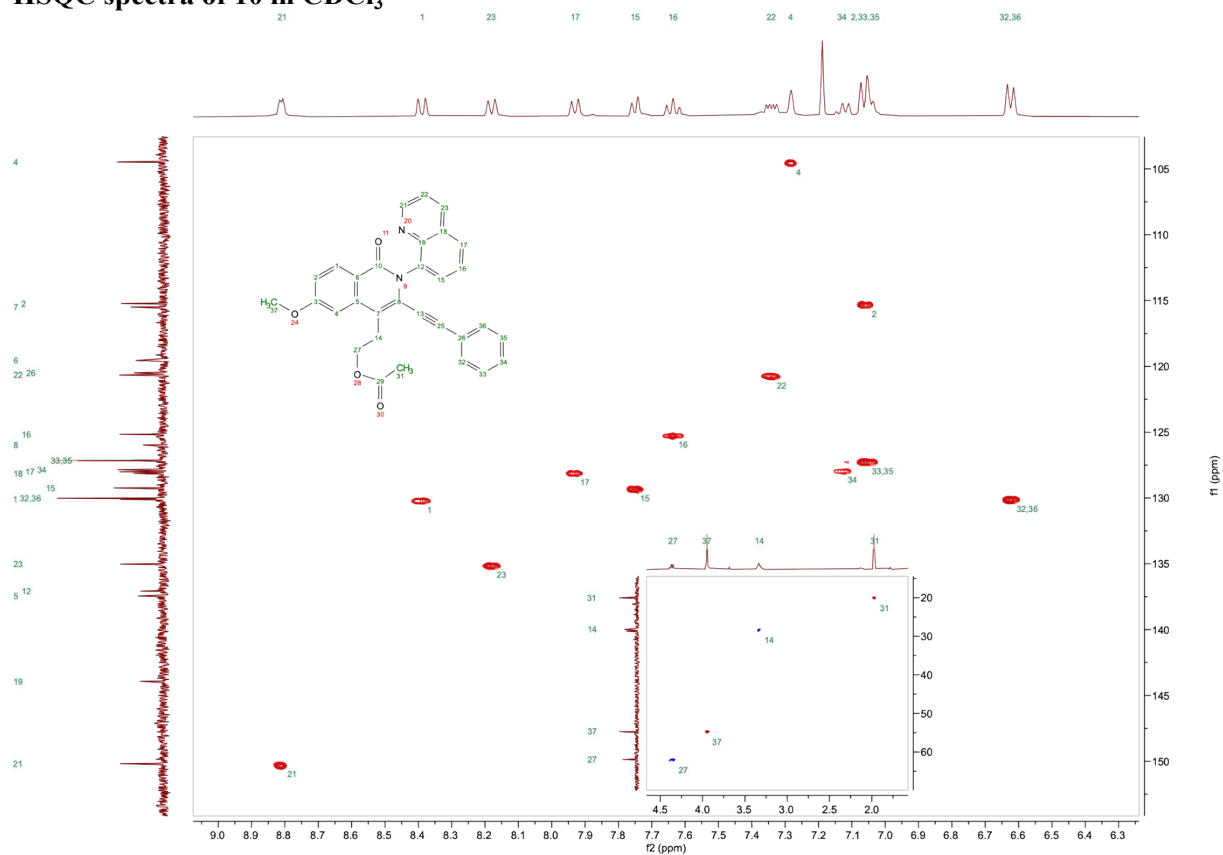

### HMBC spectra of 10 in CDCl<sub>3</sub>

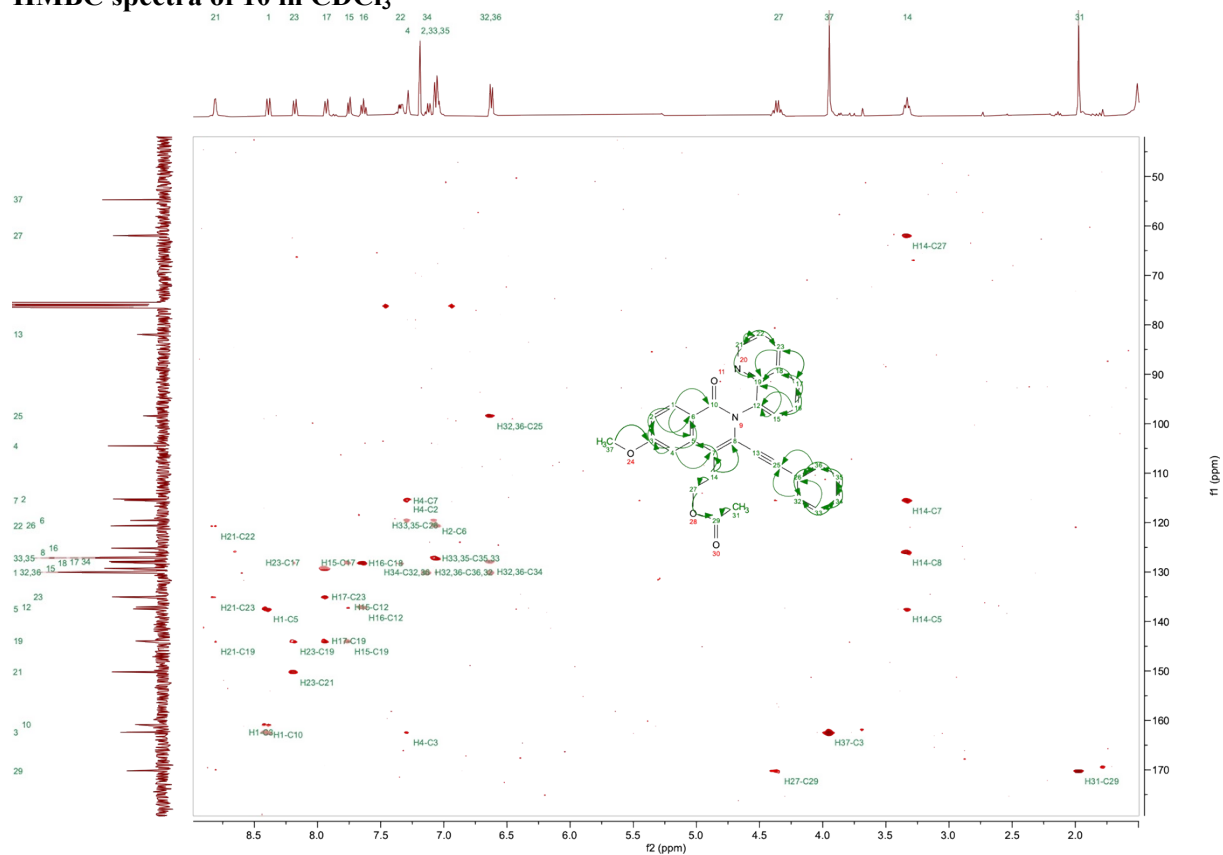



### COSY spectra of 10 in CDCl<sub>3</sub>

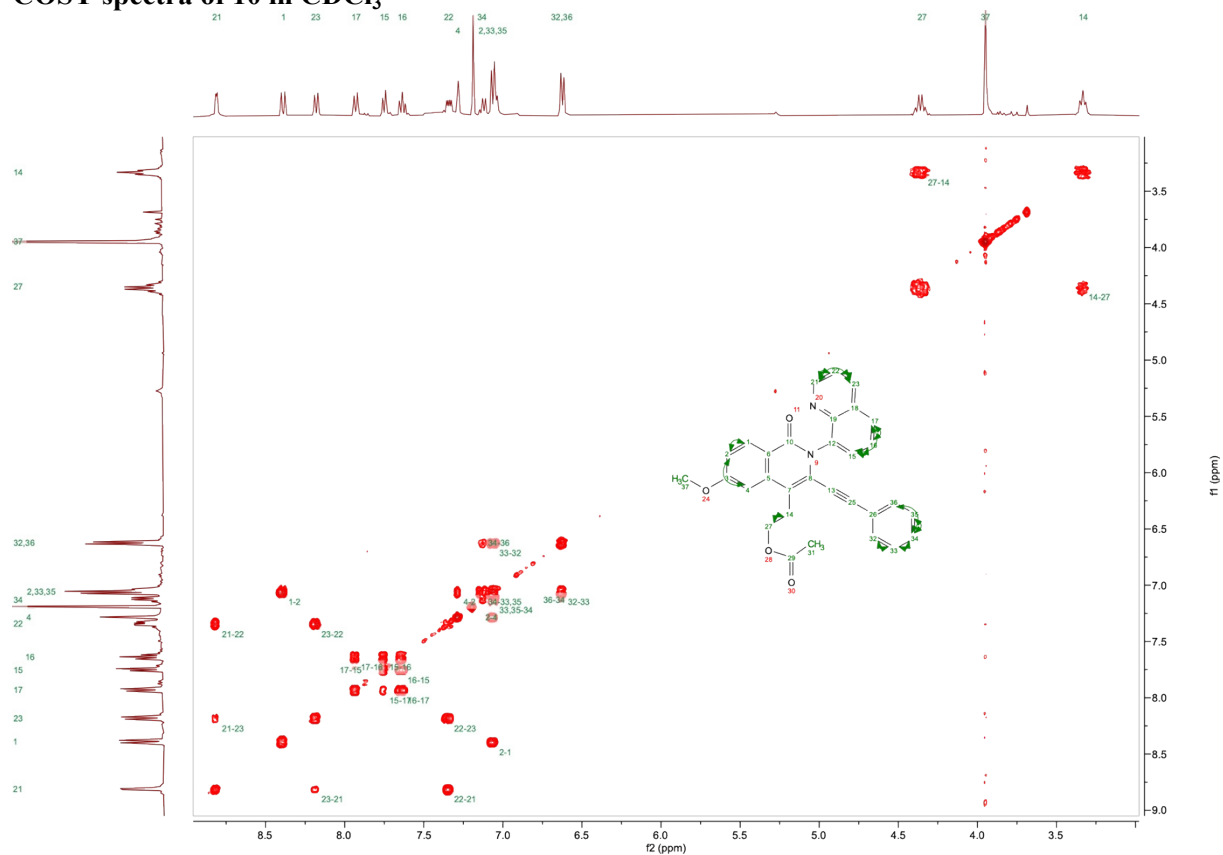

### NOESY spectra of 10 in CDCl<sub>3</sub>

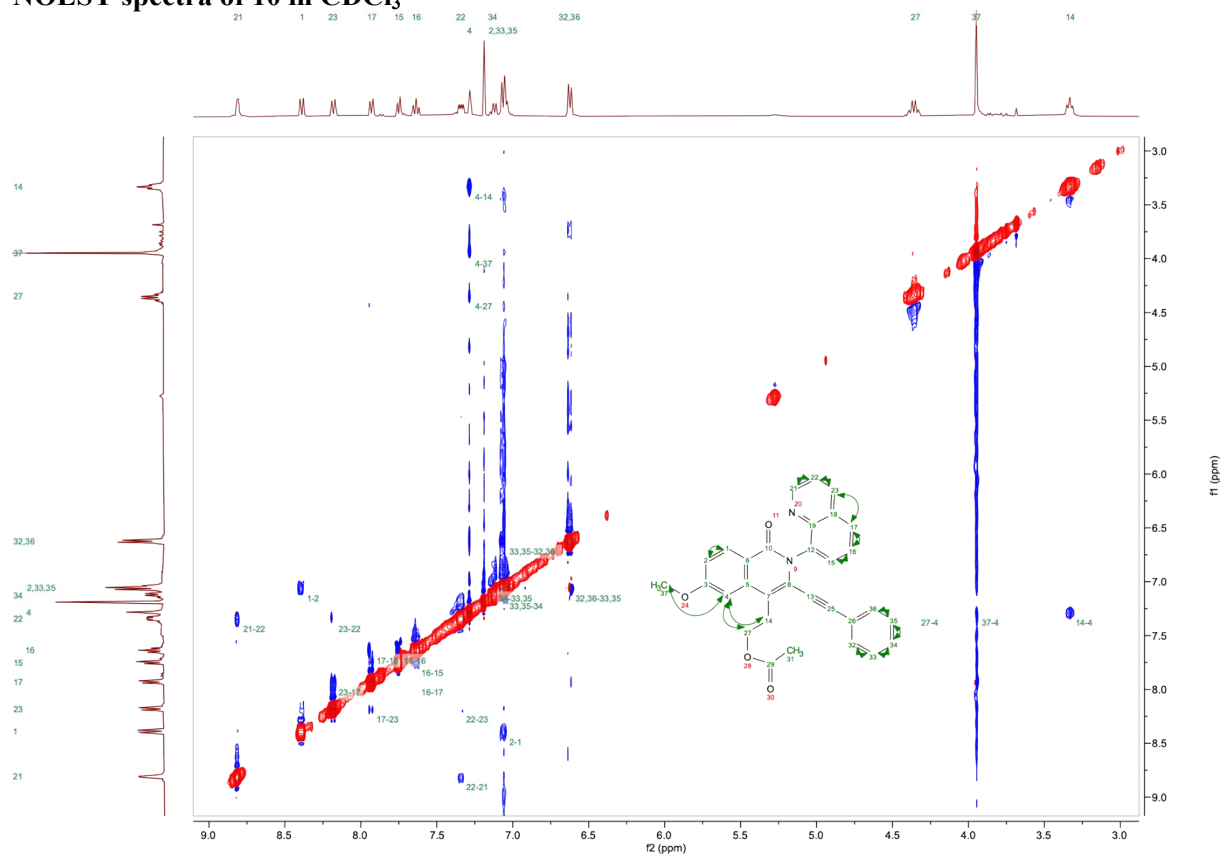

# MALDI spectra of 10 in CDCl<sub>3</sub>

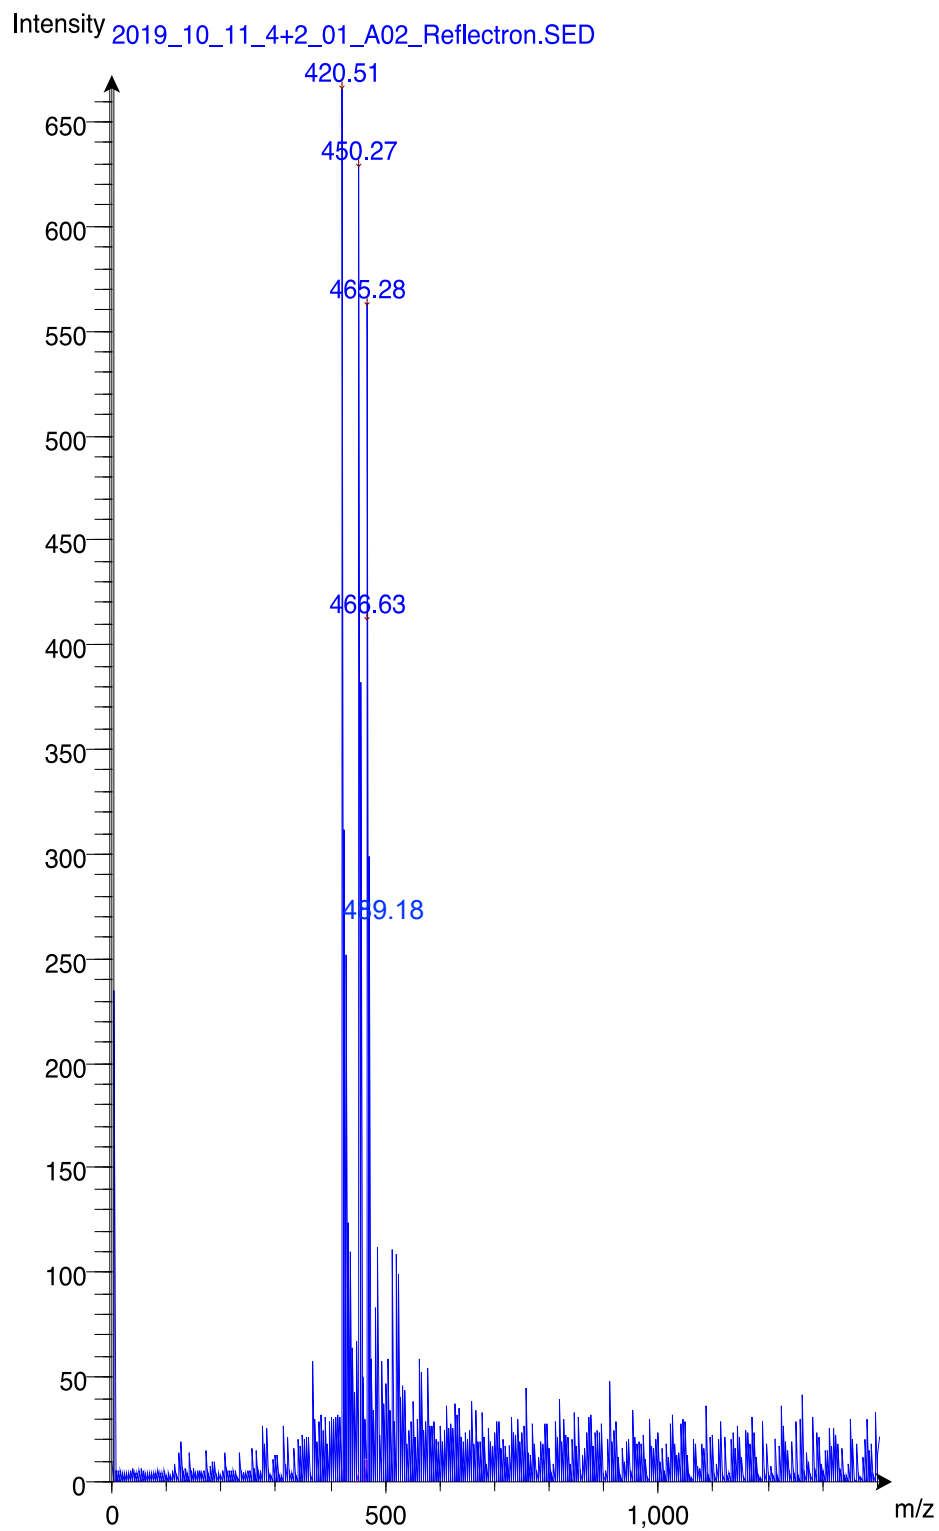

<sup>1</sup>H spectra of 13 in CDCl<sub>3</sub>

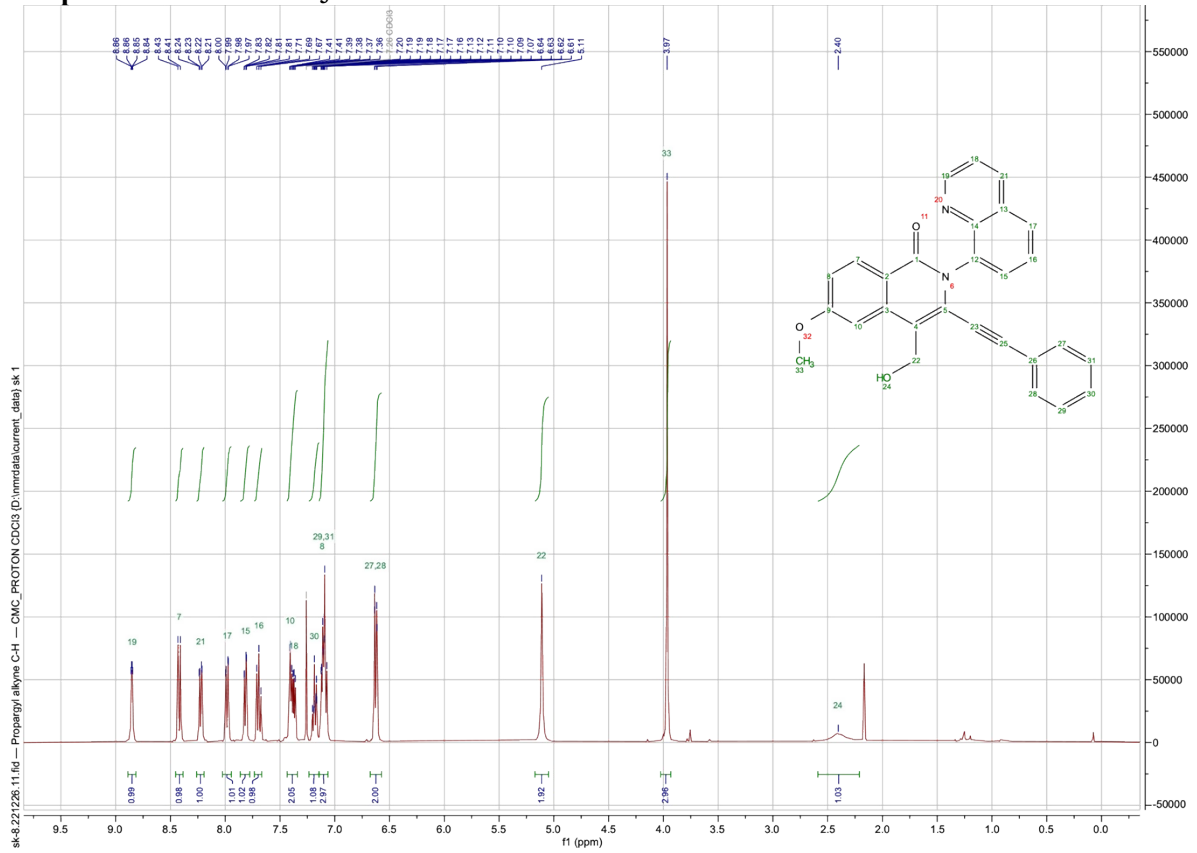

<sup>13</sup>C spectra of 13 in CDCl<sub>3</sub>

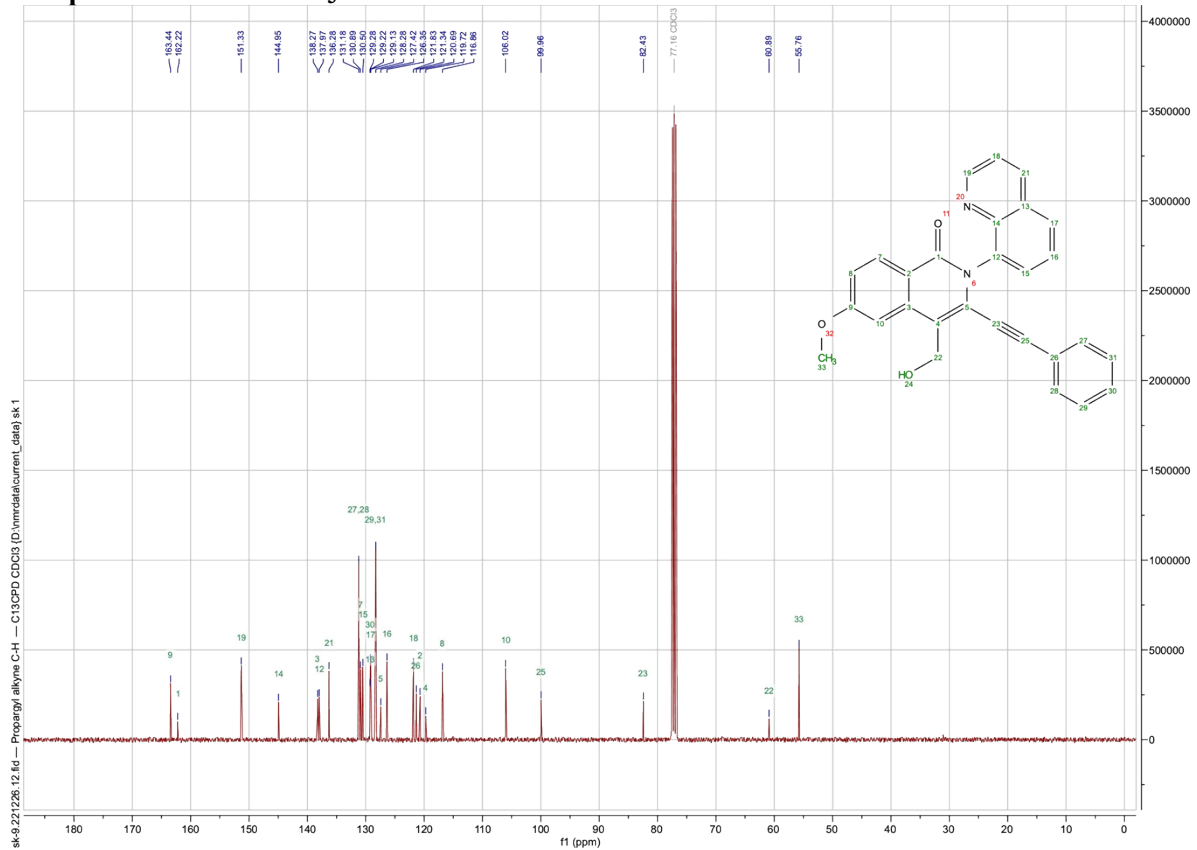

### HSQC spectra of 13 in CDCl<sub>3</sub>

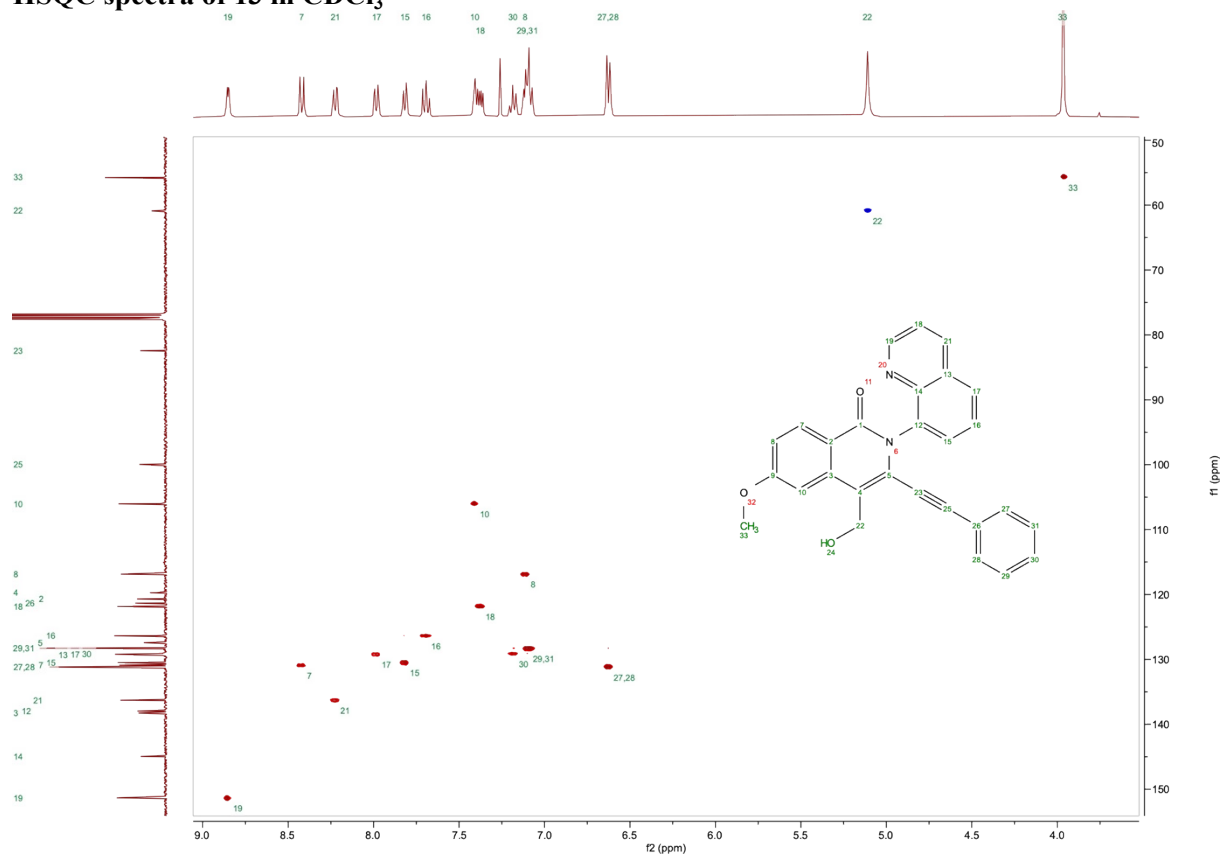

### HMBC spectra of 13 in CDCl<sub>3</sub>

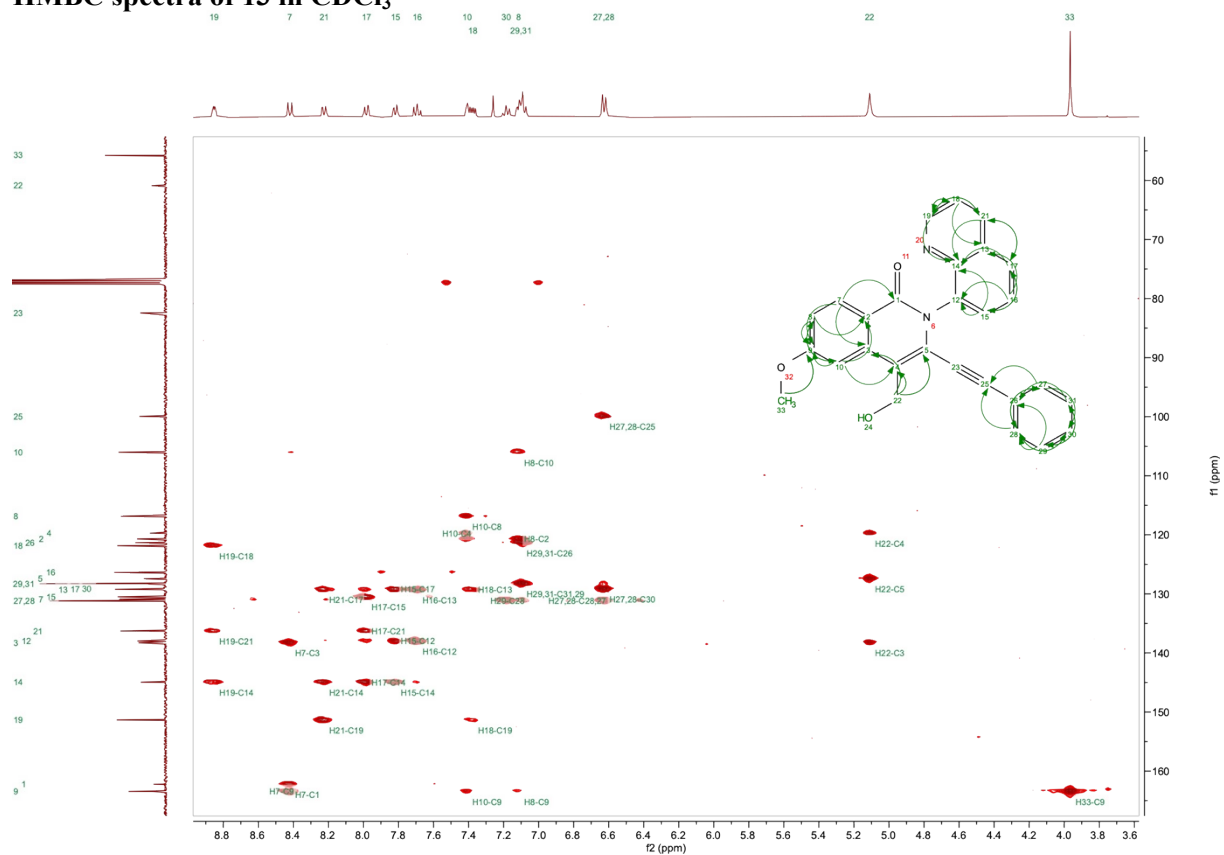

### COSY spectra of 13 in CDCl<sub>3</sub>

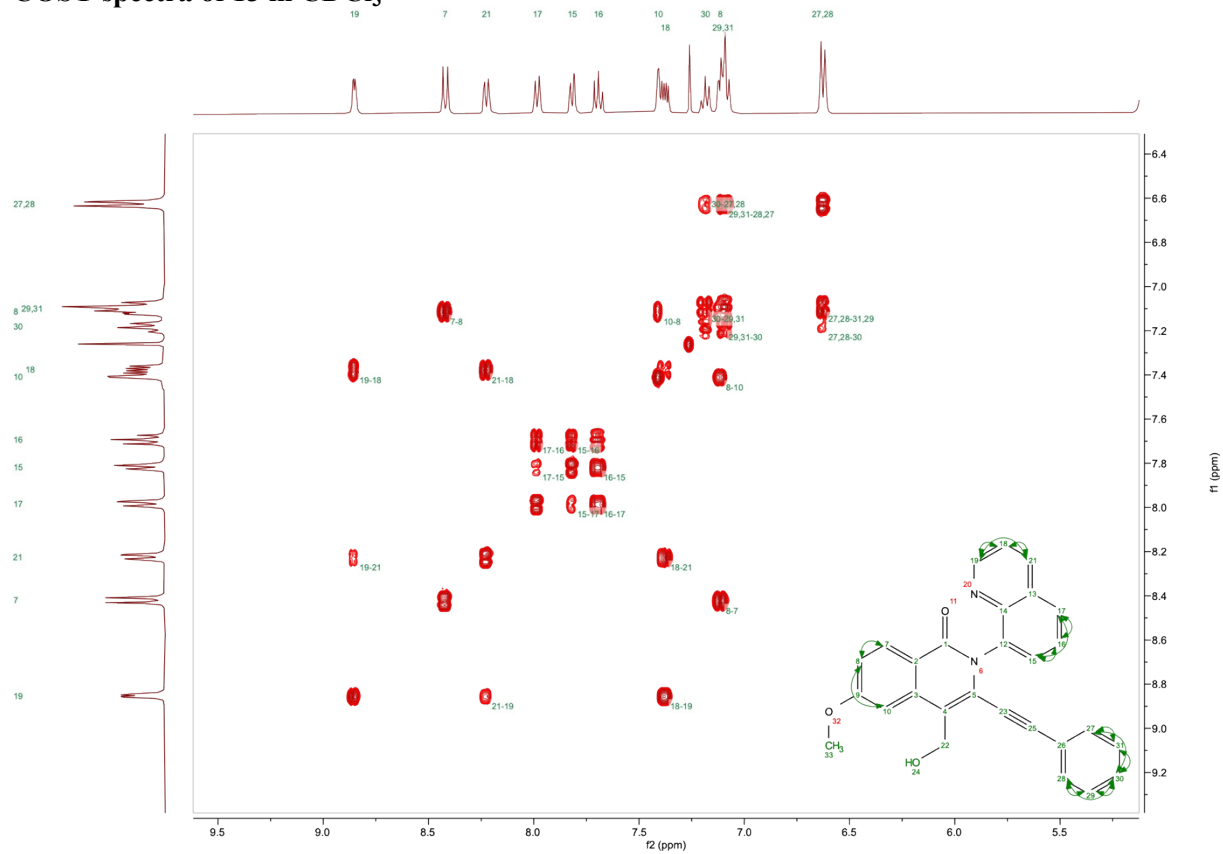

### NOESY spectra of 13 in CDCl<sub>3</sub>

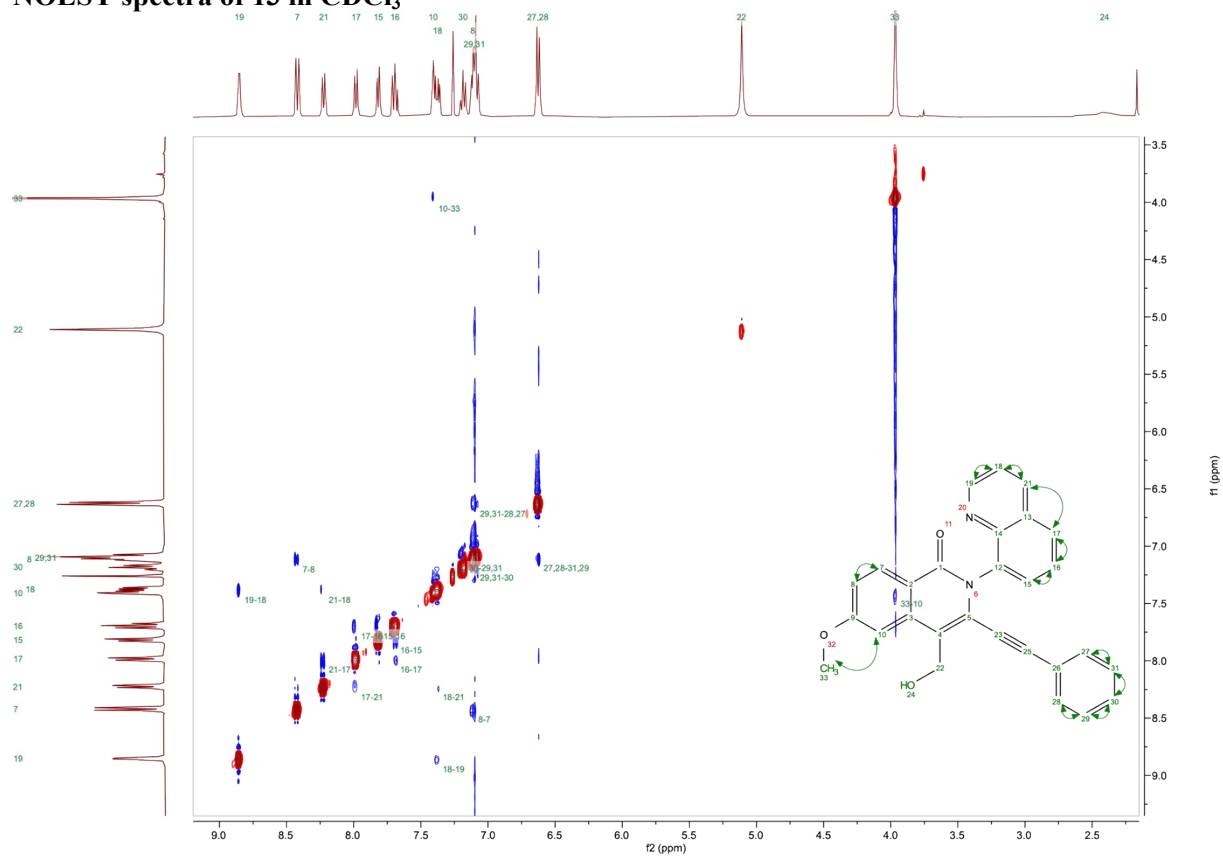

## HRMS spectra of 13

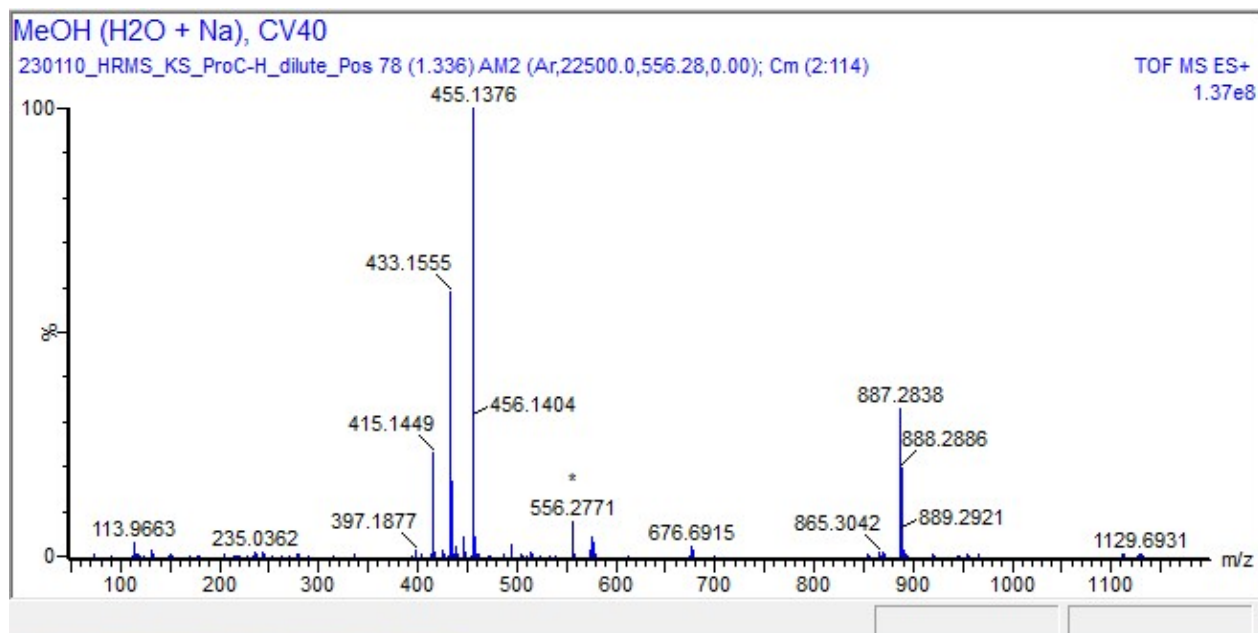

### Single Mass Analysis

Tolerance = 2.0 mDa / DBE: min = -1.5, max = 100.0

Element prediction: Off

Number of isotope peaks used for i-FIT = 2

Monoisotopic Mass, Even Electron Ions

79 formula(e) evaluated with 1 results within limits (all results (up to 1000) for each mass)

Elements Used:

C: 1-30      H: 1-22      N: 1-4      O: 1-6      Na: 0-1

| Mass     | Calc. Mass | mDa | PPM | DBE  | Formula                                                       | i... | i... | Fit Conf % | C  | H  | N | O | Na |
|----------|------------|-----|-----|------|---------------------------------------------------------------|------|------|------------|----|----|---|---|----|
| 433.1555 | 433.1552   | 0.3 | 0.7 | 19.5 | C <sub>28</sub> H <sub>21</sub> N <sub>2</sub> O <sub>3</sub> | 3... | n... | n/a        | 28 | 21 | 2 | 3 |    |

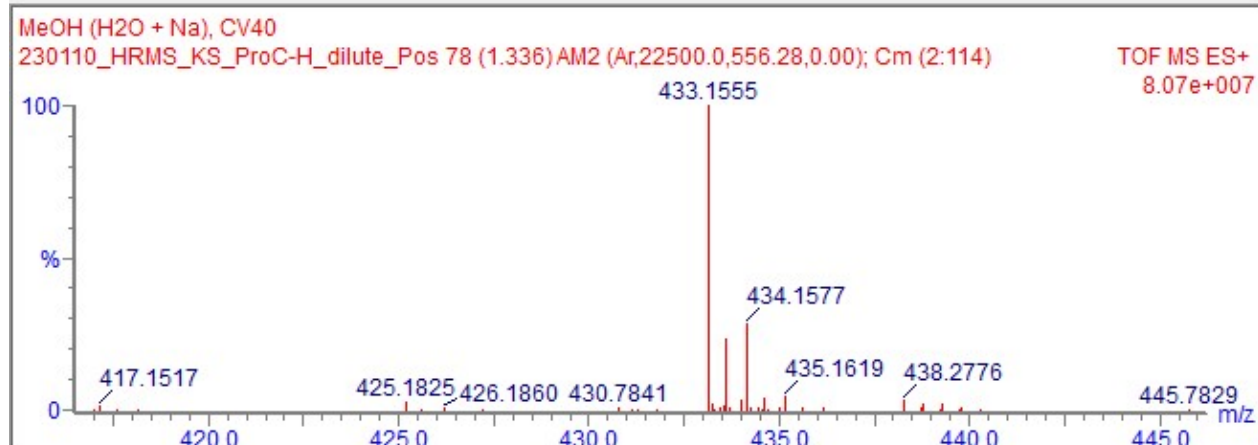

<sup>1</sup>H spectra of 14 in CDCl<sub>3</sub>

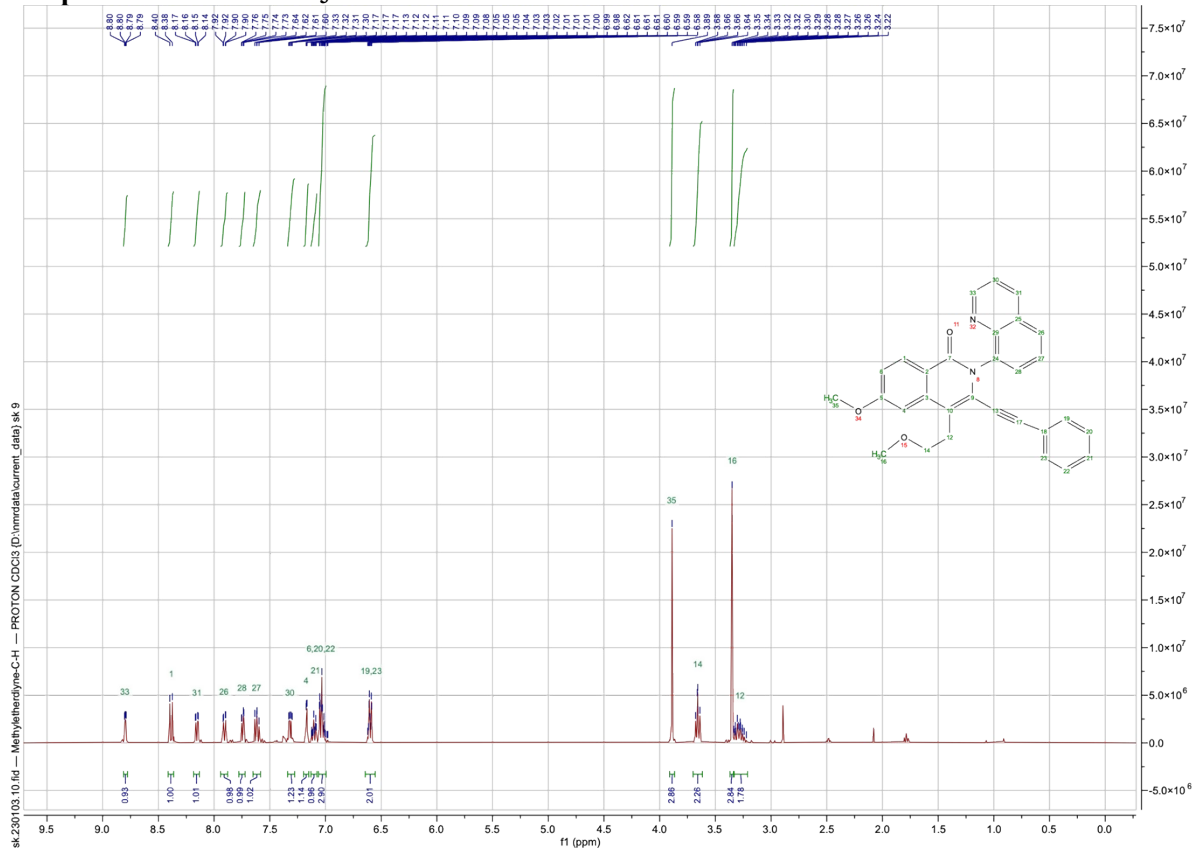

### HSQC spectra of 14 in CDCl<sub>3</sub>

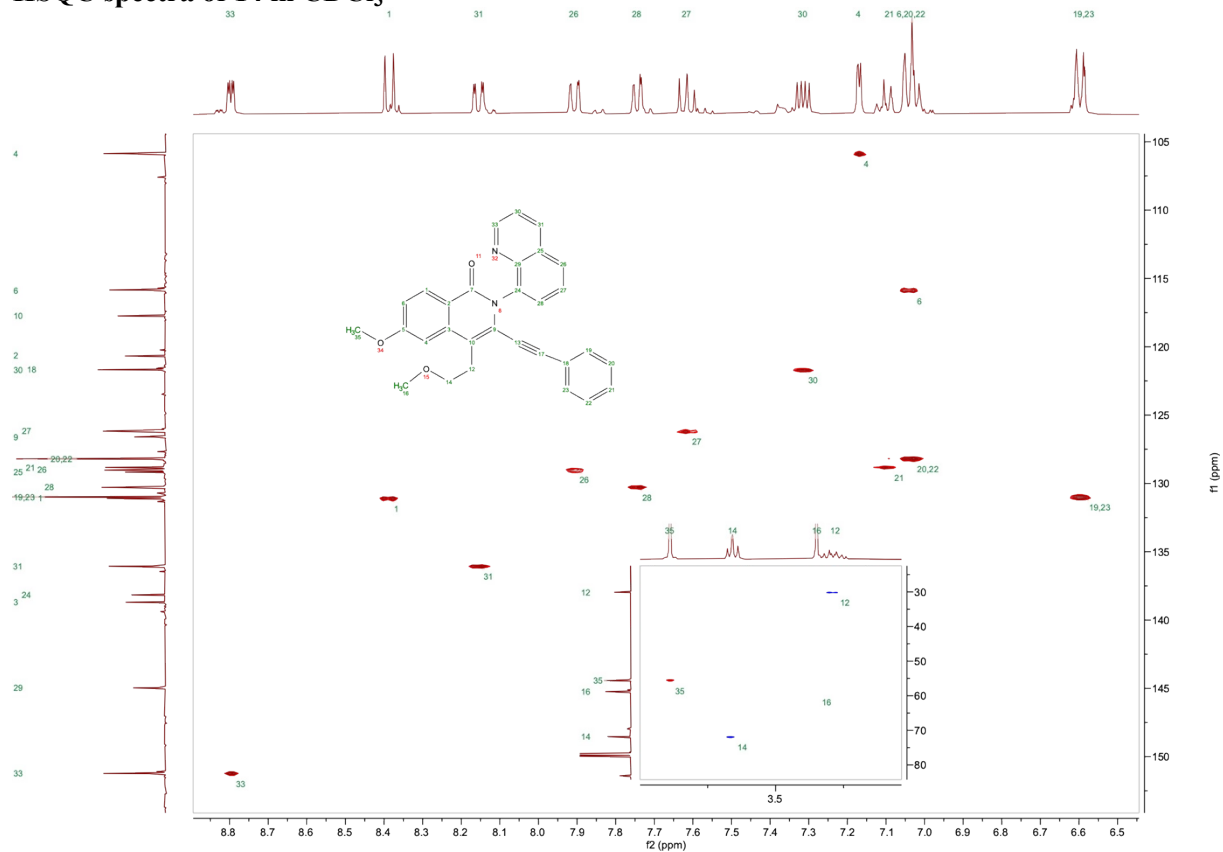

### HMBC spectra of 14 in CDCl<sub>3</sub>

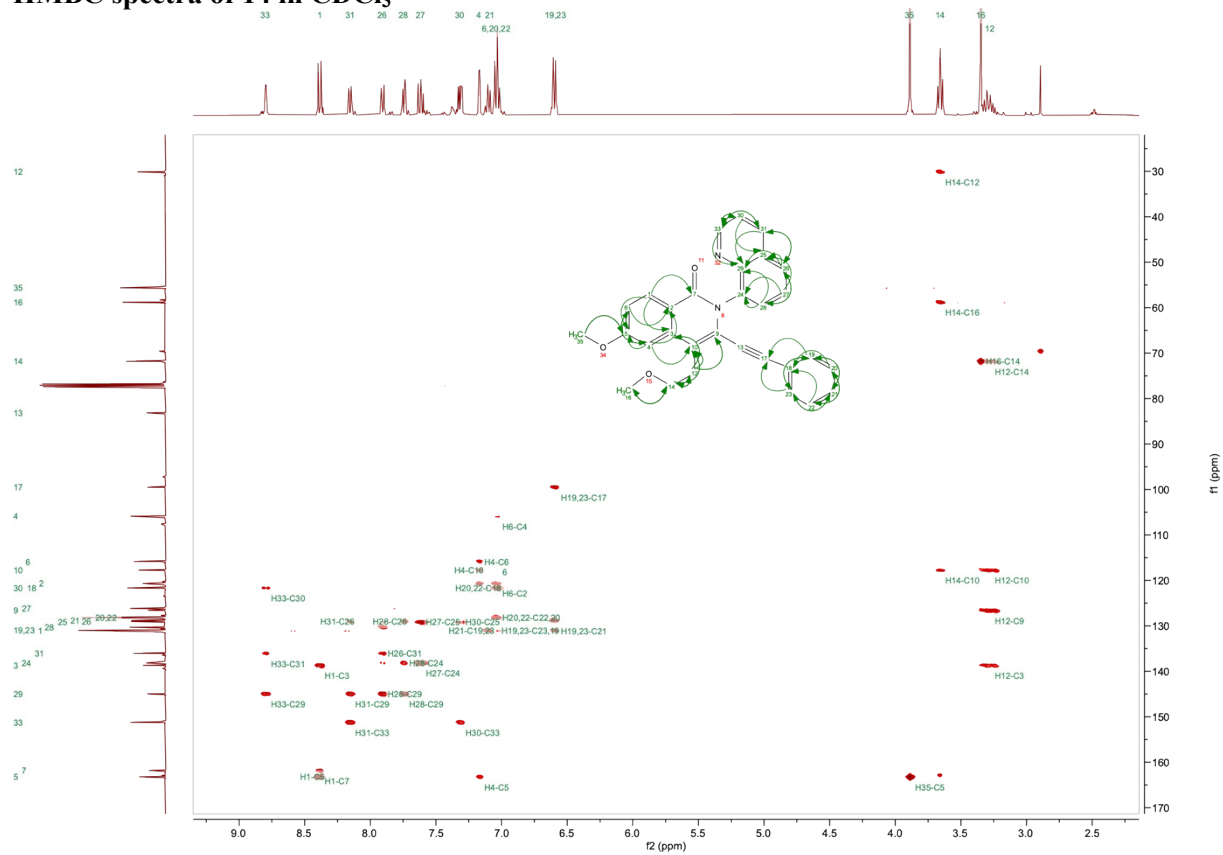



### COSY spectra of 14 in CDCl<sub>3</sub>

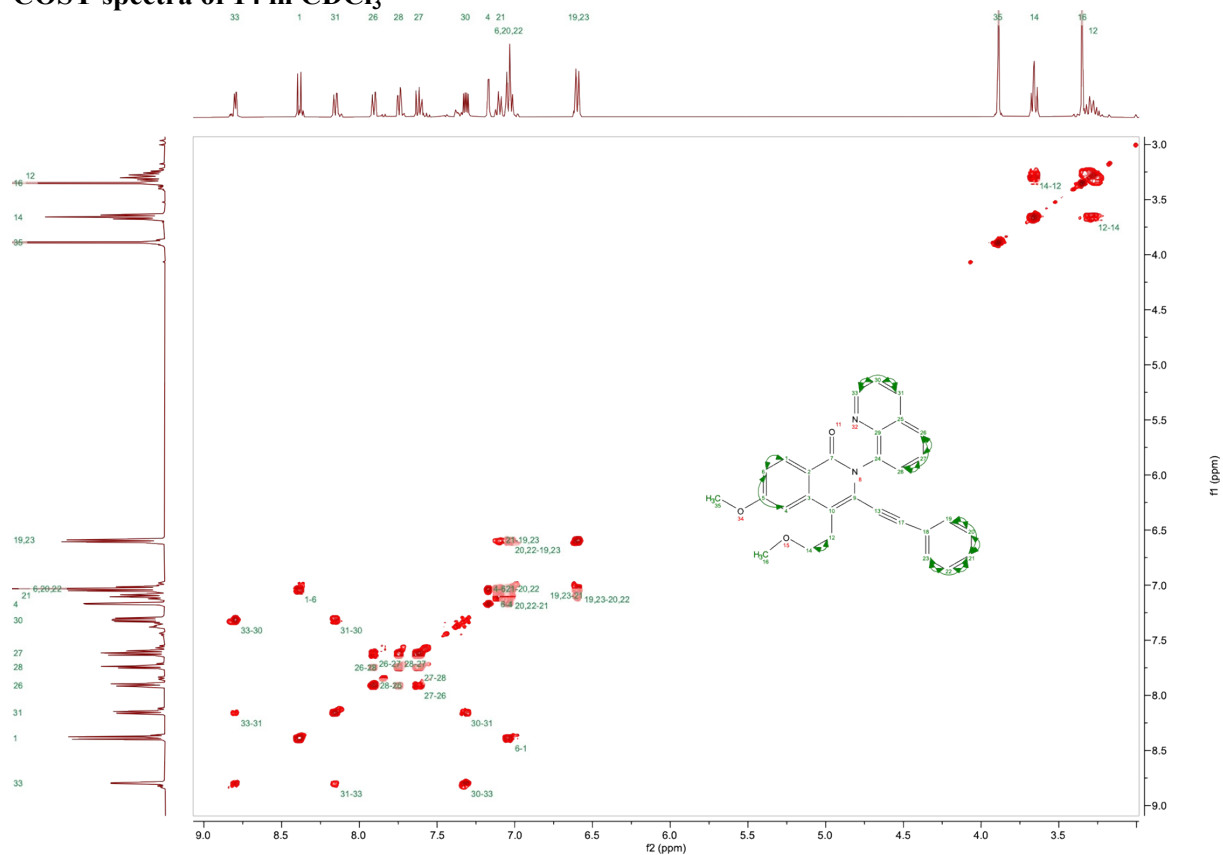

### NOESY spectra of 14 in CDCl<sub>3</sub>

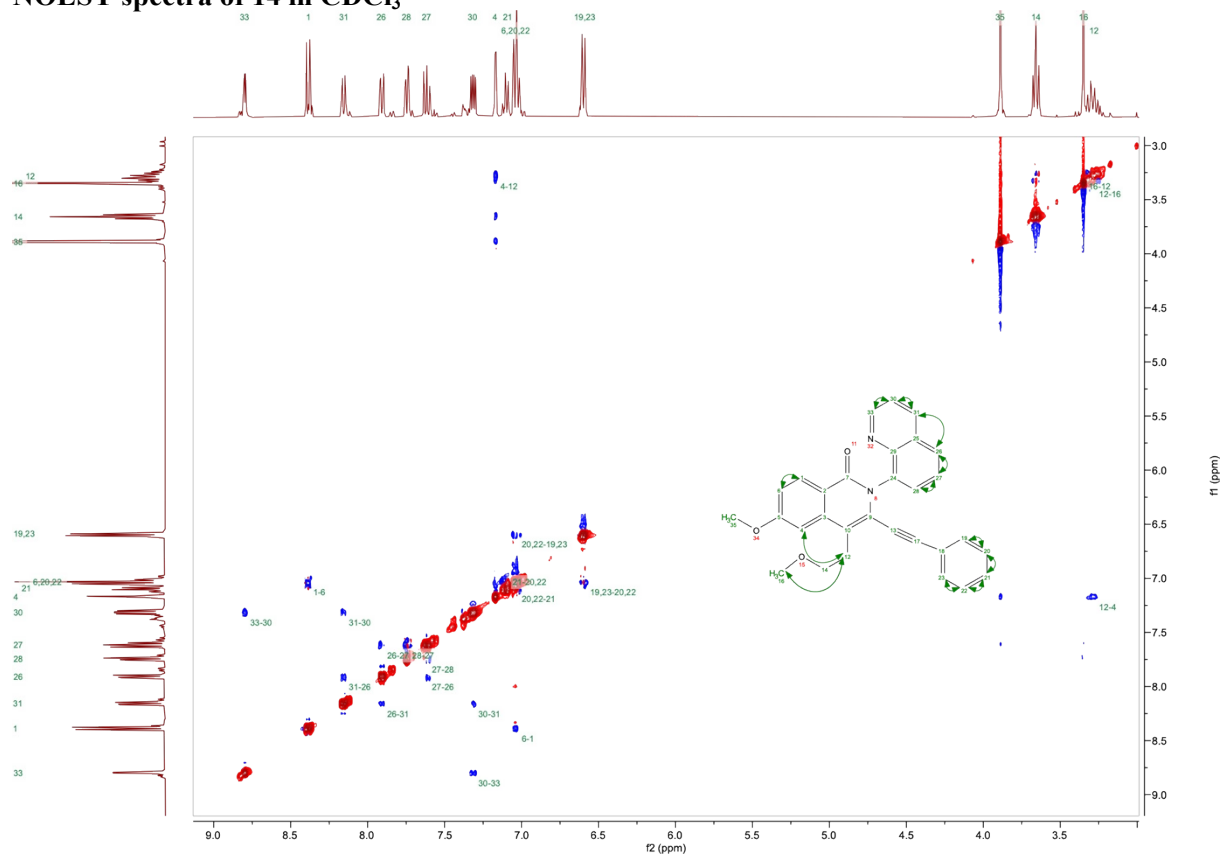

## HRMS spectra of 14

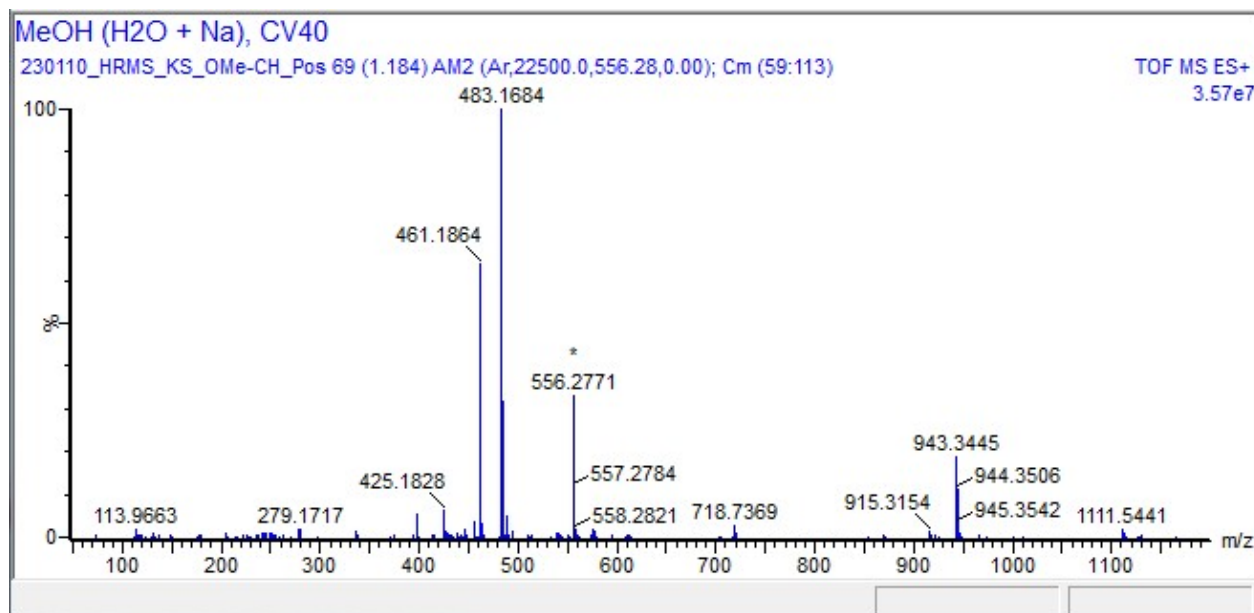

### Single Mass Analysis

Tolerance = 2.0 mDa / DBE: min = -1.5, max = 100.0

Element prediction: Off

Number of isotope peaks used for i-FIT = 2

Monoisotopic Mass, Even Electron Ions

89 formula(e) evaluated with 1 results within limits (all results (up to 1000) for each mass)

Elements Used:

C: 1-30      H: 1-30      N: 1-4      O: 1-6      Na: 0-1

| Mass     | Calc. Mass | mDa  | PPM  | DBE  | Formula                                                       | i., i.,      | Fit Conf % | C  | H  | N | O | Na |
|----------|------------|------|------|------|---------------------------------------------------------------|--------------|------------|----|----|---|---|----|
| 461.1864 | 461.1865   | -0.1 | -0.2 | 19.5 | C <sub>30</sub> H <sub>25</sub> N <sub>2</sub> O <sub>3</sub> | 3...n... n/a |            | 30 | 25 | 2 | 3 |    |

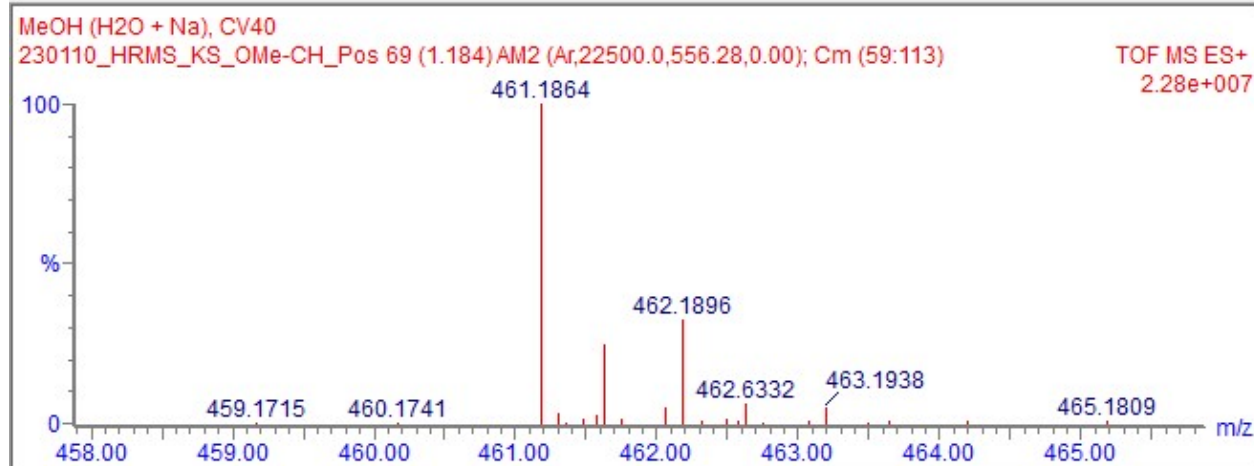



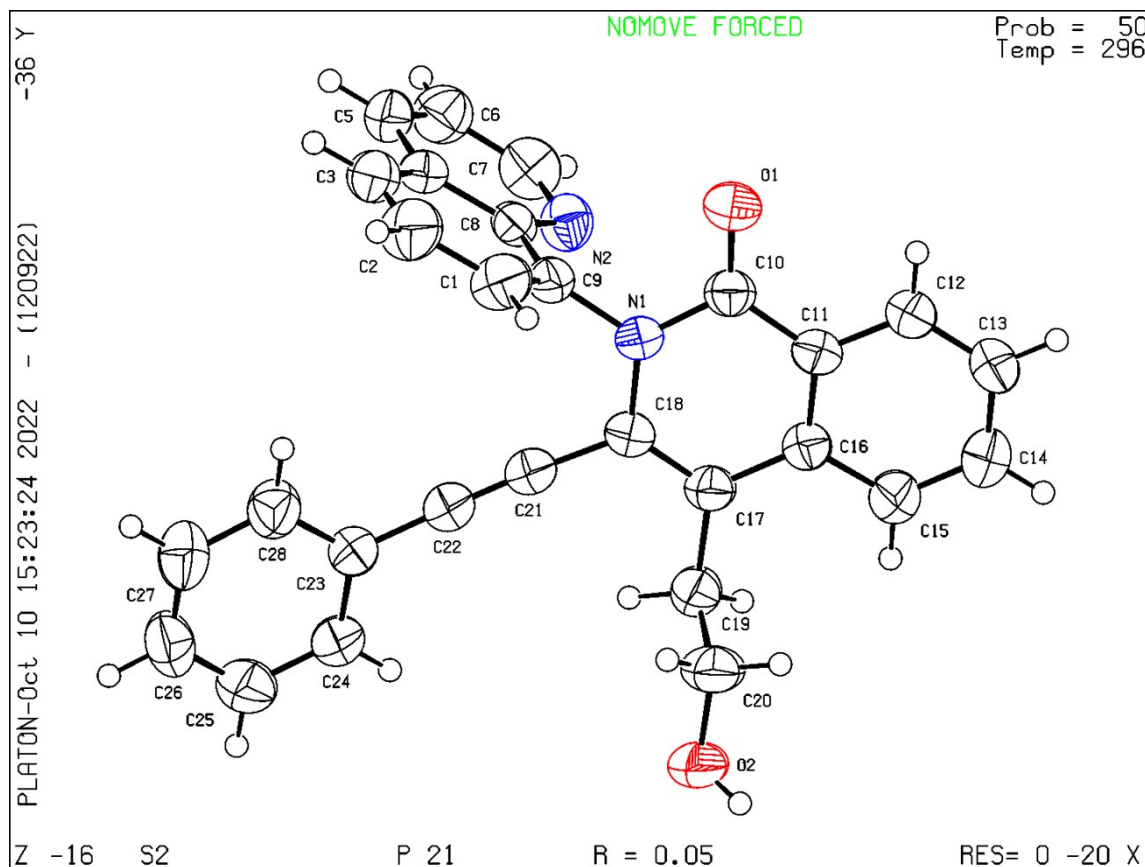

### 3da

|                 |                            |                          |                           |
|-----------------|----------------------------|--------------------------|---------------------------|
| Bond precision: | C-C = 0.0076 Å             | Wavelength=0.71073       |                           |
| Cell:           | a=18.7888 (12)<br>alpha=90 | b=10.0222 (4)<br>beta=90 | c=12.1293 (8)<br>gamma=90 |
| Temperature:    | 296 K                      |                          |                           |
|                 | Calculated                 | Reported                 |                           |
| Volume          | 2284.0 (2)                 | 2284.0 (2)               |                           |
| Space group     | P n a 21                   | P n a 21                 |                           |
| Hall group      | P 2c -2n                   | P 2c -2n                 |                           |
| Moiety formula  | C29 H22 N2 O3              | C29 H22 N2 O3            |                           |
| Sum formula     | C29 H22 N2 O3              | C29 H22 N2 O3            |                           |
| Mr              | 446.49                     | 446.48                   |                           |

|            |              |              |
|------------|--------------|--------------|
| Dx, g cm-3 | 1.298        | 1.298        |
| Z          | 4            | 4            |
| Mu (mm-1)  | 0.085        | 0.085        |
| F000       | 936.0        | 936.0        |
| F000'      | 936.41       |              |
| h, k, lmax | 22, 11, 14   | 22, 11, 14   |
| Nref       | 4029[ 2119]  | 3300         |
| Tmin, Tmax | 0.979, 0.992 | 0.979, 0.992 |
| Tmin'      | 0.979        |              |

Correction method= # Reported T Limits: Tmin=0.979 Tmax=0.992  
AbsCorr = MULTI-SCAN

Data completeness= 1.56/0.82      Theta(max)= 24.998

R(reflections)= 0.0541( 2636)      wR<sup>2</sup> (reflections)=  
0.1438( 3300)

S = 1.033      Npar= 309

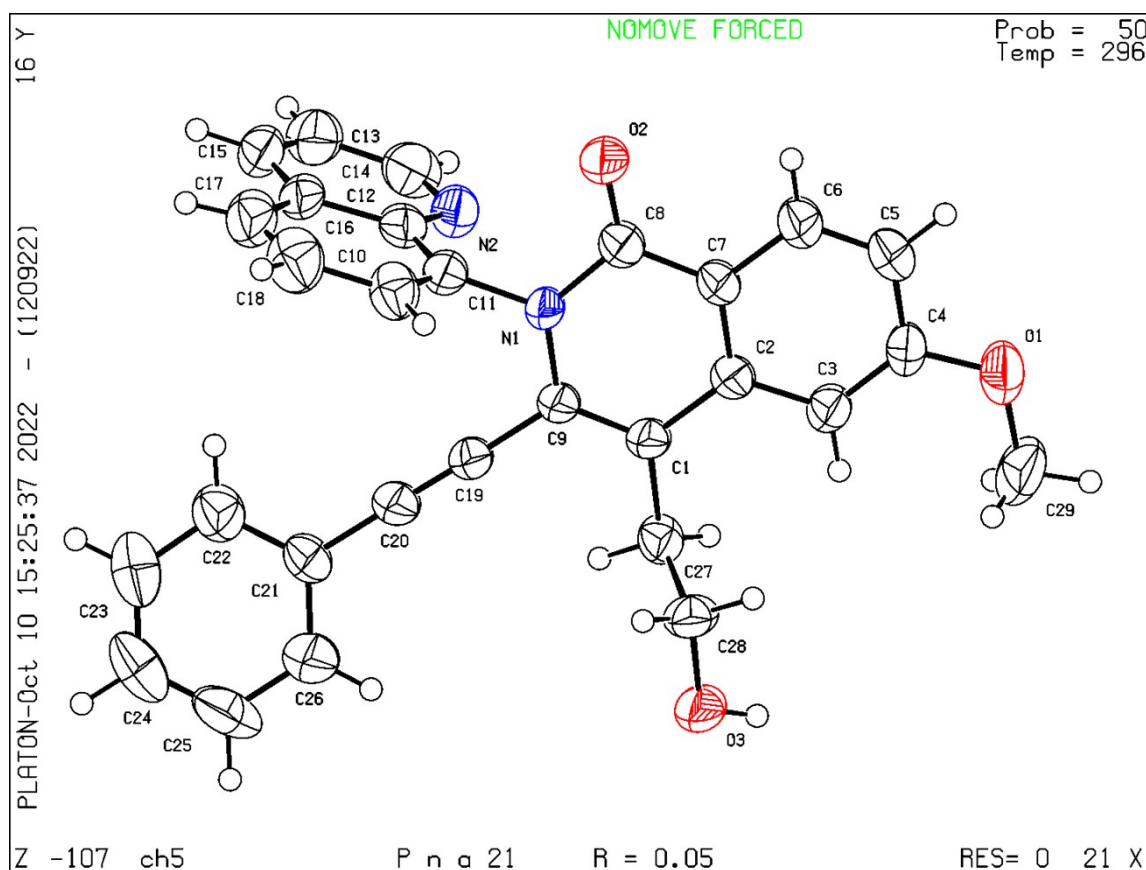

### 3ga

Bond precision: C-C = 0.0037 Å

Wavelength=0.71073



4ab

Bond precision: C-C = 0.0049 Å

Wavelength=0.71073

Cell: a=9.1585(3) b=10.7347(4) c=11.6344(5)  
 alpha=93.7241(17) beta=98.7149(18) gamma=99.1029(17)  
 Temperature: 296 K

|                        | Calculated    | Reported      |
|------------------------|---------------|---------------|
| Volume                 | 1111.73(7)    | 1111.73(7)    |
| Space group            | P -1          | P -1          |
| Hall group             | -P 1          | -P 1          |
| Moiety formula         | C29 H22 N2 O2 | C29 H22 N2 O2 |
| Sum formula            | C29 H22 N2 O2 | C29 H22 N2 O2 |
| Mr                     | 430.49        | 430.48        |
| Dx, g cm <sup>-3</sup> | 1.286         | 1.286         |
| Z                      | 2             | 2             |
| Mu (mm <sup>-1</sup> ) | 0.081         | 0.081         |
| F000                   | 452.0         | 452.0         |
| F000'                  | 452.19        |               |
| h, k, lmax             | 10, 12, 13    | 10, 12, 13    |
| Nref                   | 3909          | 3903          |
| Tmin, Tmax             | 0.980, 0.987  | 0.980, 0.987  |
| Tmin'                  | 0.980         |               |

Correction method= # Reported T Limits: Tmin=0.980  
 Tmax=0.987 AbsCorr = MULTI-SCAN

Data completeness= 0.998

Theta(max)= 24.998

R(reflections)= 0.0654( 2286)

wR2(reflections)=  
 0.2109( 3903)

S = 1.057

Npar= 302

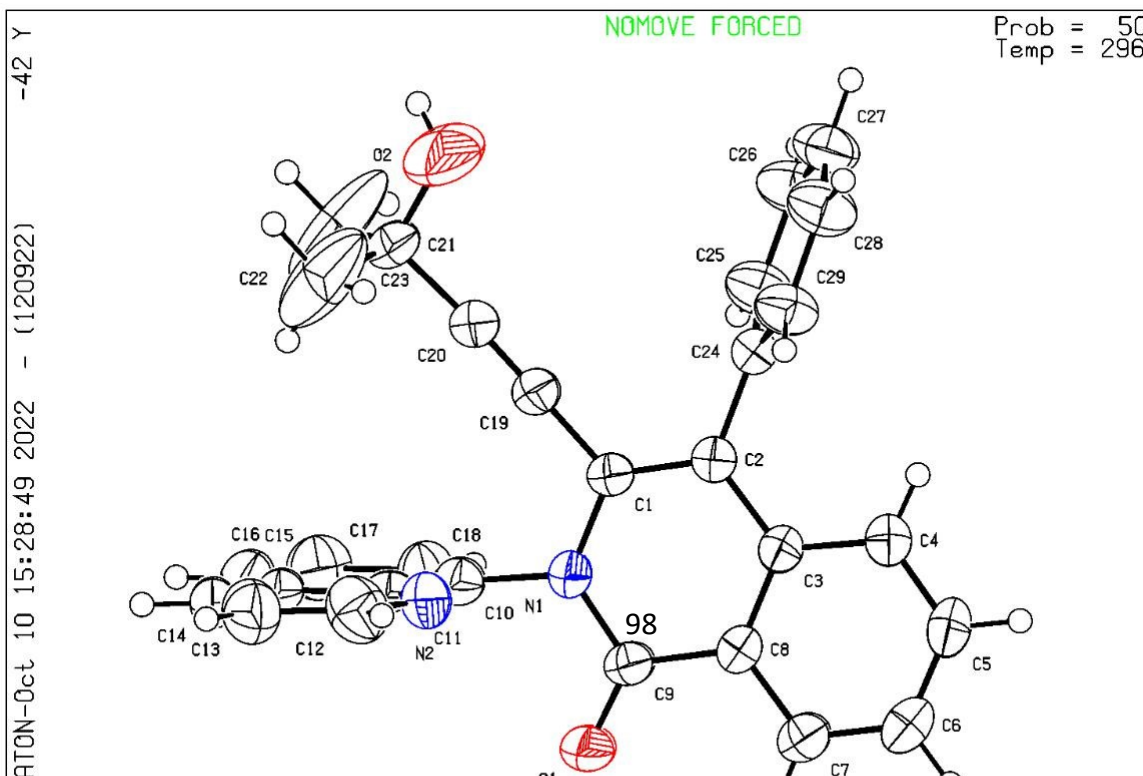

#### 4db

---

|                        |                |                    |               |
|------------------------|----------------|--------------------|---------------|
| Bond precision:        | C-C = 0.0033 Å | Wavelength=0.71073 |               |
| Cell:                  | a=12.6907 (7)  | b=16.3431 (9)      | c=13.3615 (9) |
|                        | alpha=90       | beta=118.292 (2)   | gamma=90      |
| Temperature:           | 296 K          |                    |               |
|                        | Calculated     | Reported           |               |
| Volume                 | 2440.2 (3)     | 2440.2 (3)         |               |
| Space group            | P 21/n         | P 21/n             |               |
| Hall group             | -P 2yn         | -P 2yn             |               |
| Moiety formula         | C30 H24 N2 O3  | C30 H24 N2 O3      |               |
| Sum formula            | C30 H24 N2 O3  | C30 H24 N2 O3      |               |
| Mr                     | 460.51         | 460.51             |               |
| Dx, g cm <sup>-3</sup> | 1.253          | 1.253              |               |
| Z                      | 4              | 4                  |               |
| Mu (mm <sup>-1</sup> ) | 0.081          | 0.081              |               |
| F000                   | 968.0          | 968.0              |               |
| F000'                  | 968.42         |                    |               |
| h, k, lmax             | 15, 19, 16     | 15, 19, 16         |               |
| Nref                   | 4403           | 4393               |               |
| Tmin, Tmax             | 0.992, 0.996   | 0.686, 0.745       |               |
| Tmin'                  | 0.992          |                    |               |



Correction method= # Reported T Limits: Tmin=0.686  
Tmax=0.745 AbsCorr = MULTI-SCAN

Data completeness= 0.998

Theta(max)= 25.233

R(reflections)=  
0.0441 (2922)

wR<sup>2</sup>(reflections)=

0.1210 (4393)

s = 1.006

Npar= 323

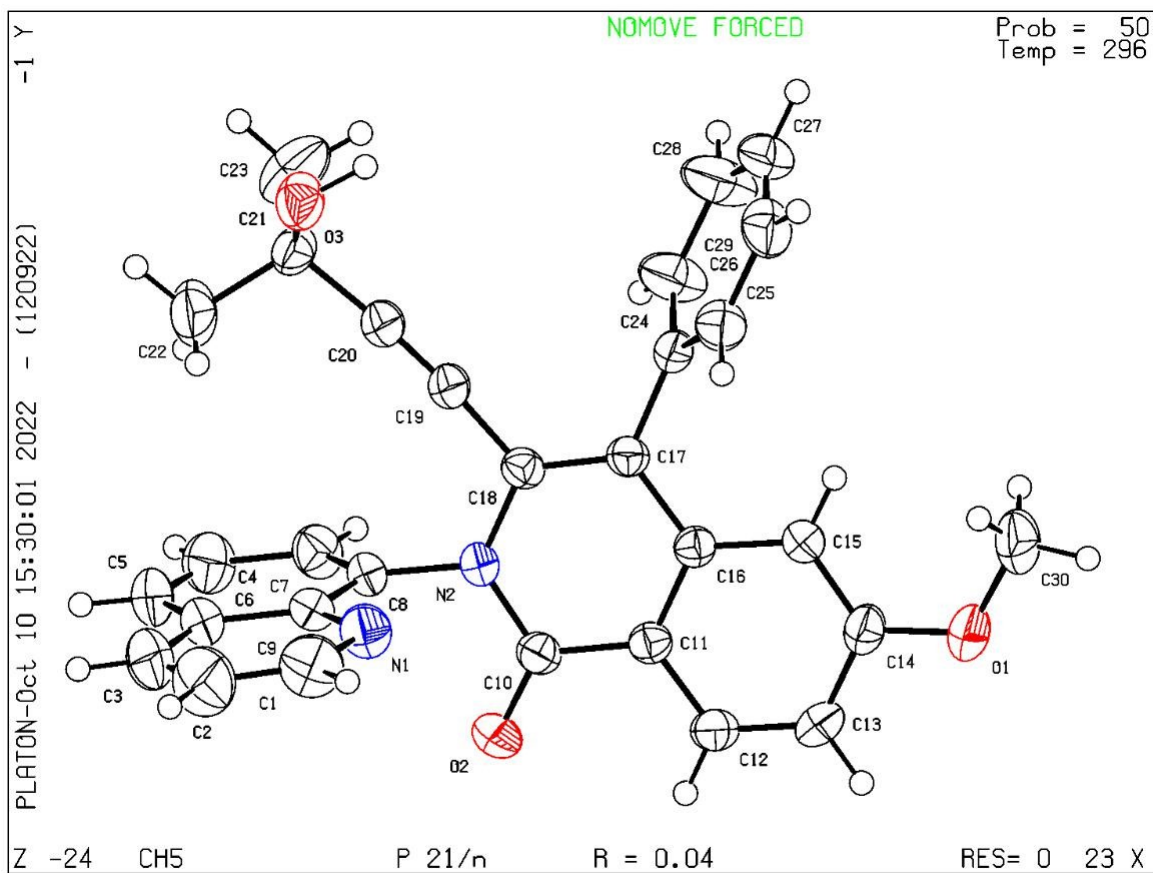

## References

1. Kathiravan, S.; Nicholls, I. A., Cobalt Catalyzed, Regioselective C(sp<sup>2</sup>)-H Activation of Amides with 1,3-Diynes. *Organic Letters* **2017**, *19* (18), 4758-4761.
2. Montierth, J. M.; DeMario, D. R.; Kurth, M. J.; Schore, N. E., The polymer-supported Cadiot-Chodkiewicz coupling of acetylenes to produce unsymmetrical diynes. *Tetrahedron* **1998**, *54* (39), 11741-11748.
3. Sanz-Marco, A.; Blay, G.; Muñoz, M. C.; Pedro, J. R., Highly enantioselective copper(I)-catalyzed conjugate addition of 1,3-diynes to  $\alpha,\beta$ -unsaturated trifluoromethyl ketones. *Chemical Communications* **2015**, *51* (43), 8958-8961.
